# Supplementary material for: CD161 Expression Defines a Th1/Th17 Polyfunctional Subset of Resident Memory T Lymphocytes in Bronchoalveolar Cells
Source: PubMed Central journal article supplement (PMC4408072; doi:10.1371/journal.pone.0123591), 2015-04-23

## S2 Fig. Individual flow cytometry plots.

| <b>Content</b>                                                                                                | <b>Page</b> |
|---------------------------------------------------------------------------------------------------------------|-------------|
| 1.-Individual flow cytometry results of every experiment of CXCR6 expression.                                 | 2           |
| 2.-Individual flow cytometry results of every experiment of CD161 expression on CD3 peripheral lymphocytes.   | 11          |
| 3.-Individual flow cytometry results of every experiment of CD161 expression on CD3 alveolar lymphocytes.     | 16          |
| 4.-Individual flow cytometry results of every experiment of CD45RO expression on CD161+ alveolar lymphocytes. | 22          |
| 5.-Cytokines produced by CD161+ alveolar and peripheral cells.                                                | 25          |
| 6.-Individual polyfunctional CD3+CD161+ cells.                                                                | 51          |

## **PLOS ONE**

CD161 expression defines a Th1/Th17 polyfunctional subset of resident memory T lymphocytes in bronchoalveolar cells

Gonzalez Y. et al.

1.-Individual flow cytometry results of every experiment of CXCR6 expression.

# Sample ID: PTCH11

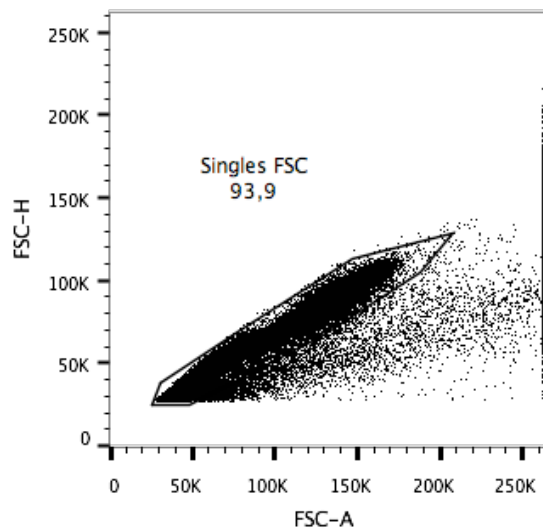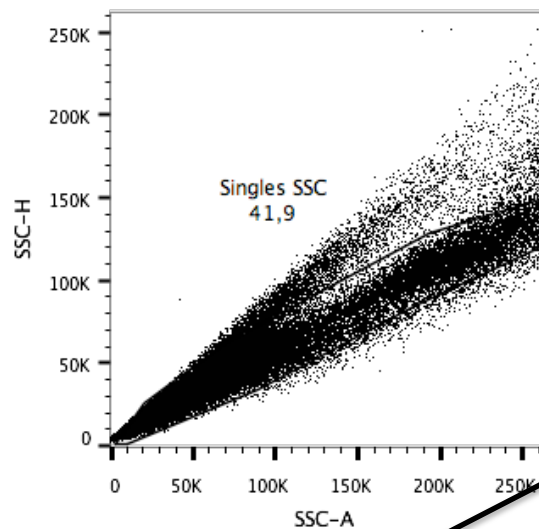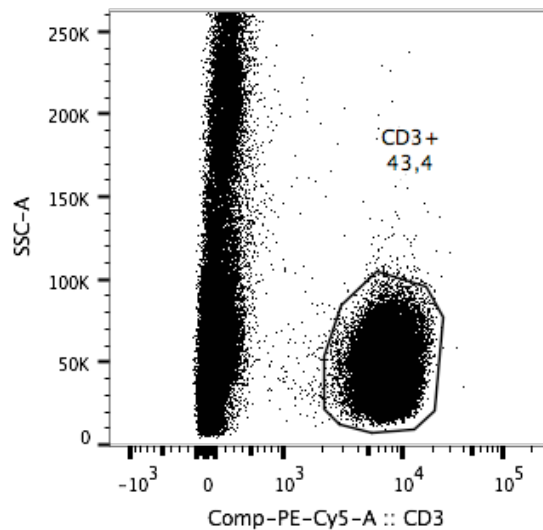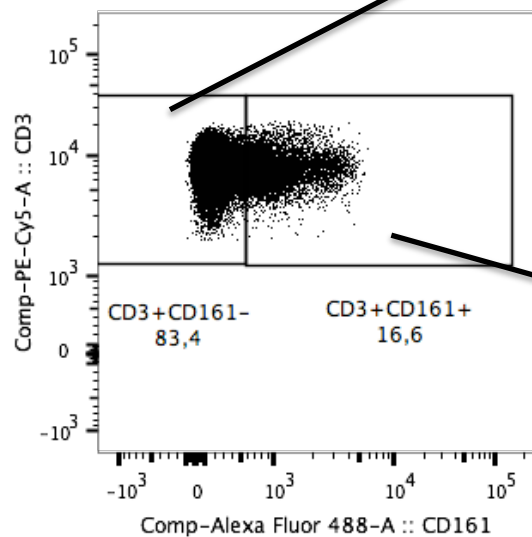

## CD3+CD161-CD45RO+CXCR6+

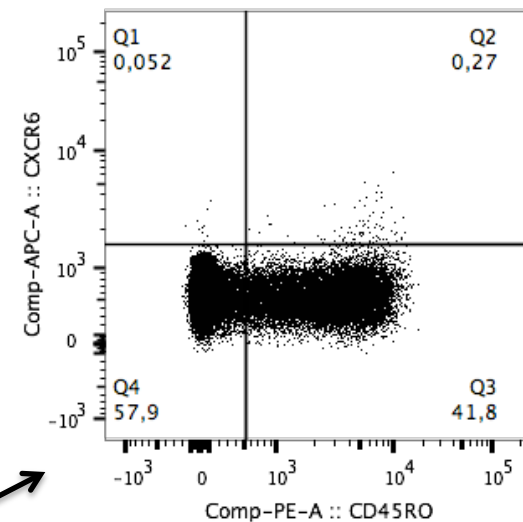

## CD3+CD161+CD45RO+CXCR6+

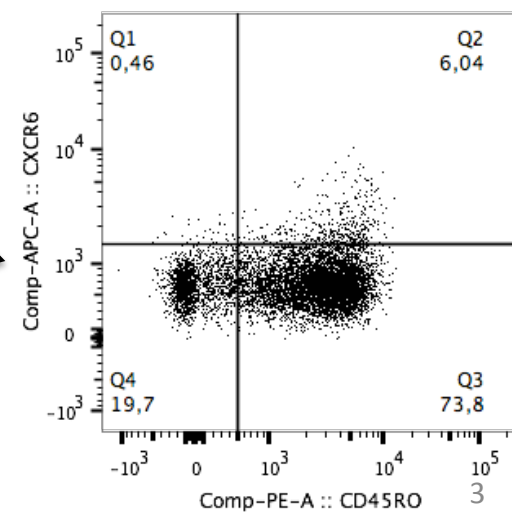

# FMO control

Sample ID: PTCH11

CD3+CD161-CD45RO+FMO

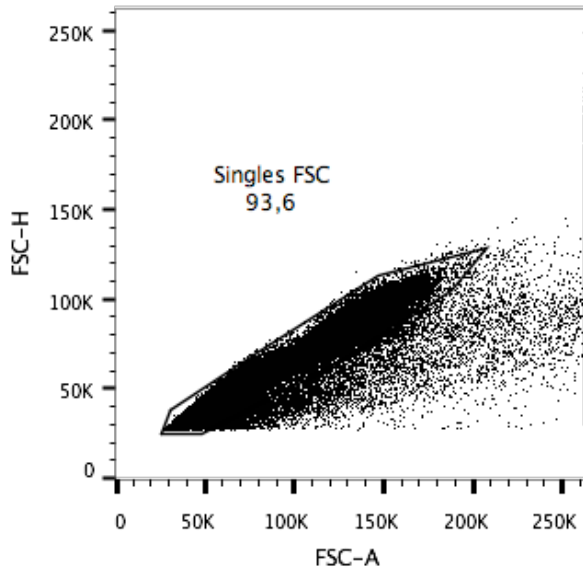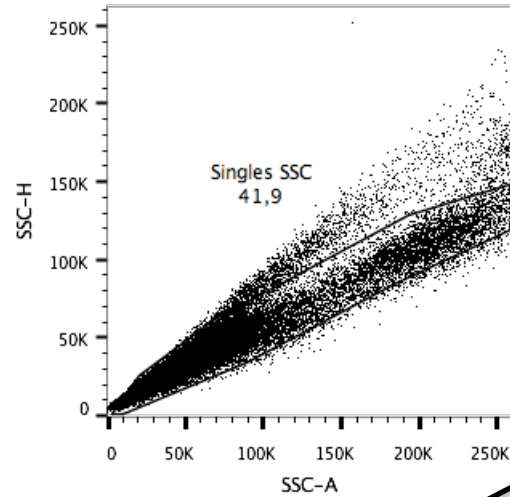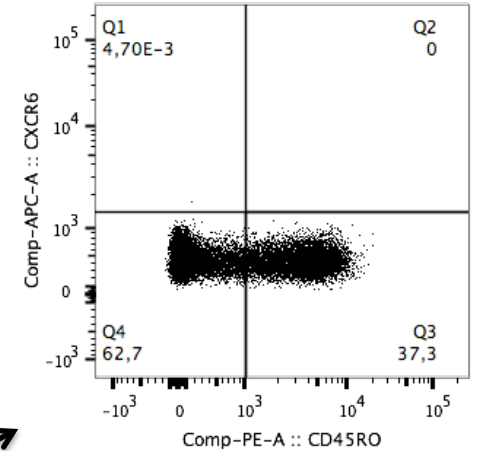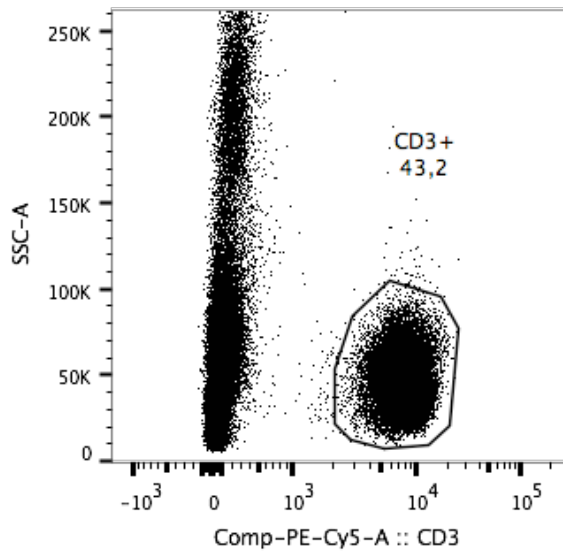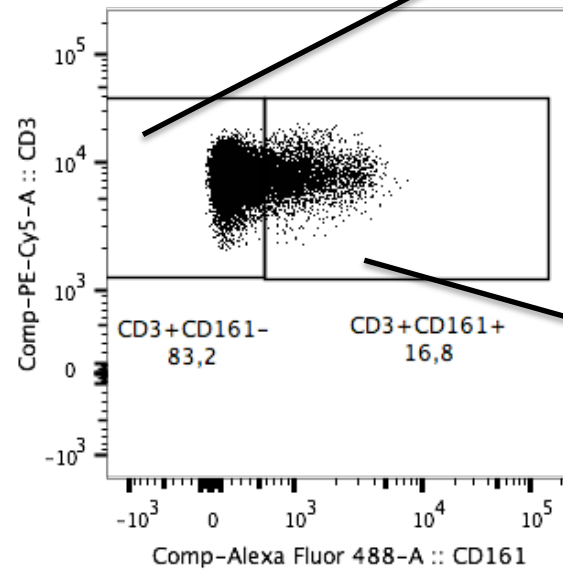

CD3+CD161+CD45RO+FMO

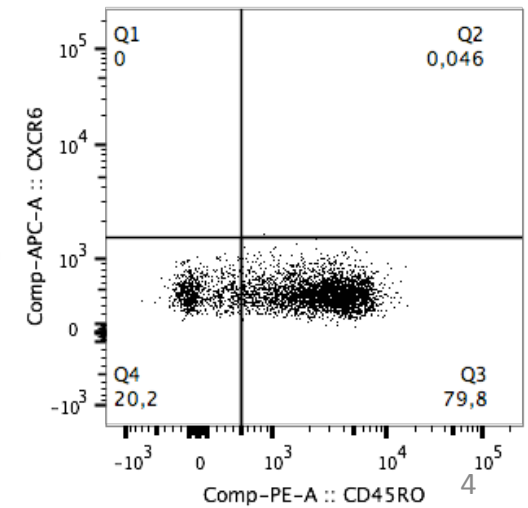

Sample ID: PTCH12

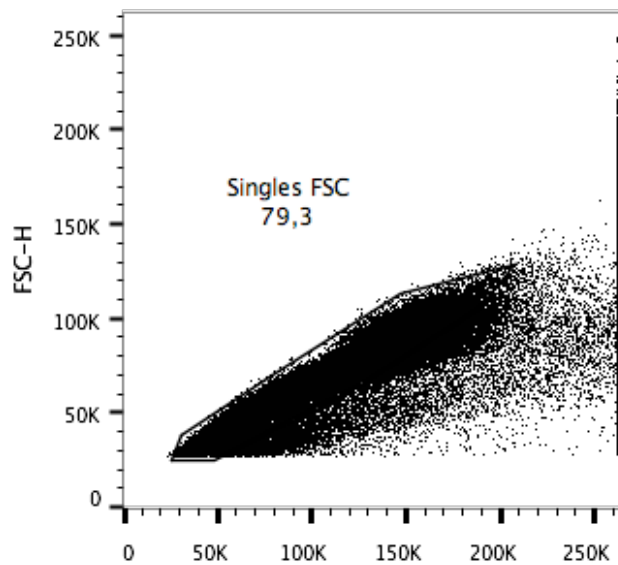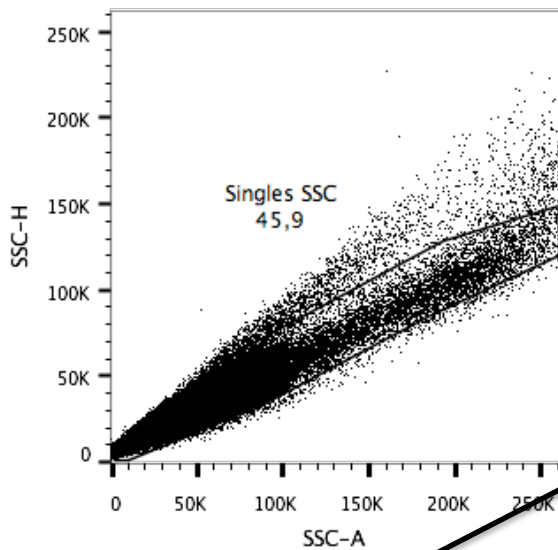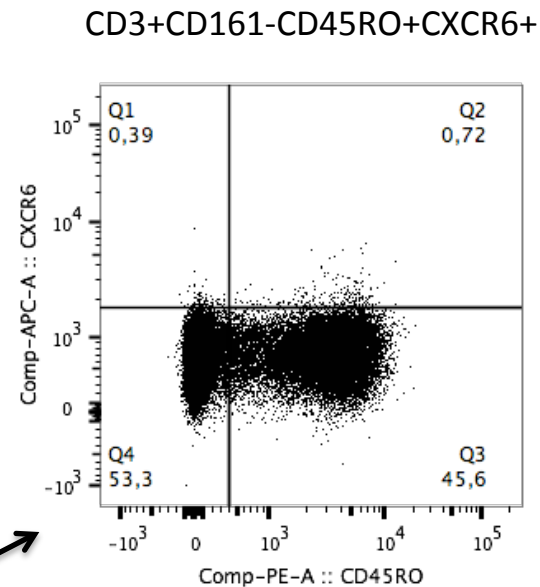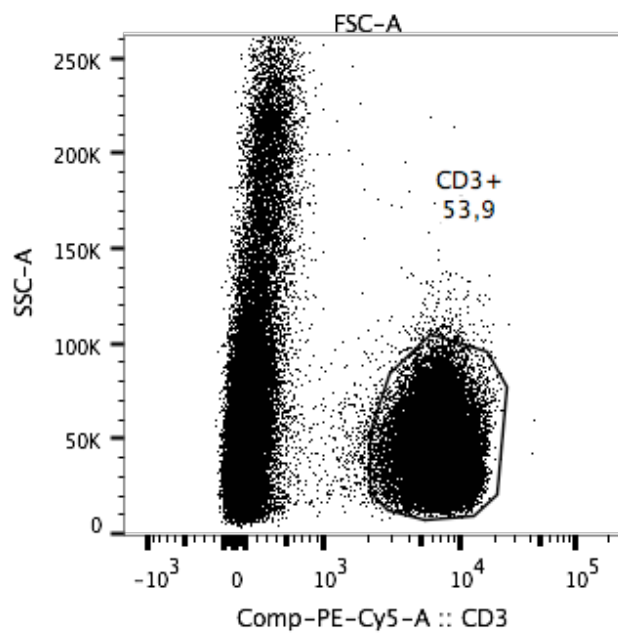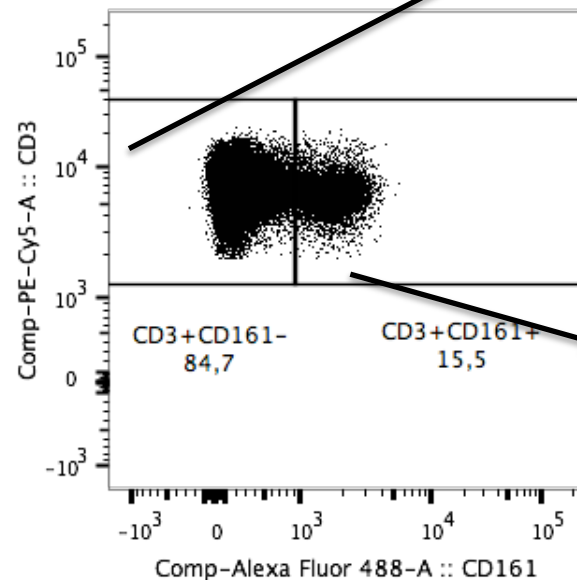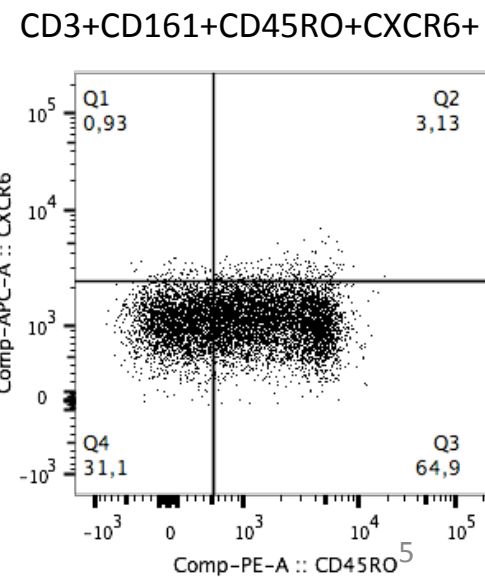

Sample ID: PTCH12

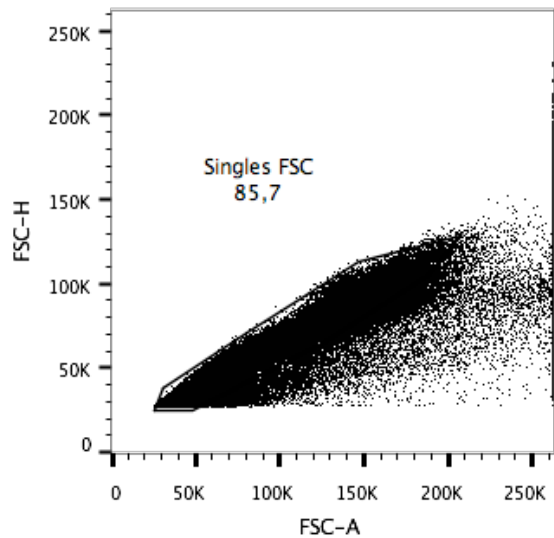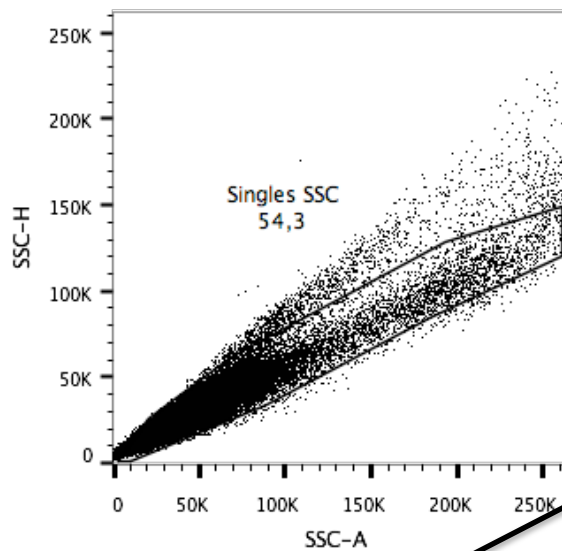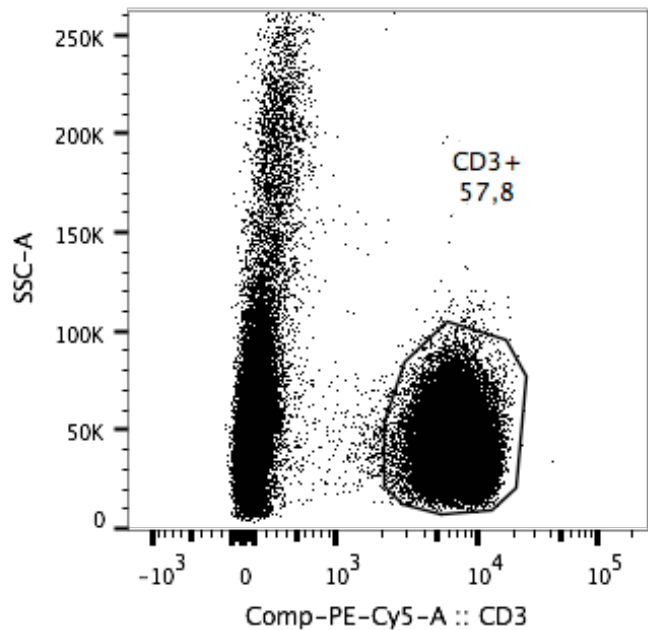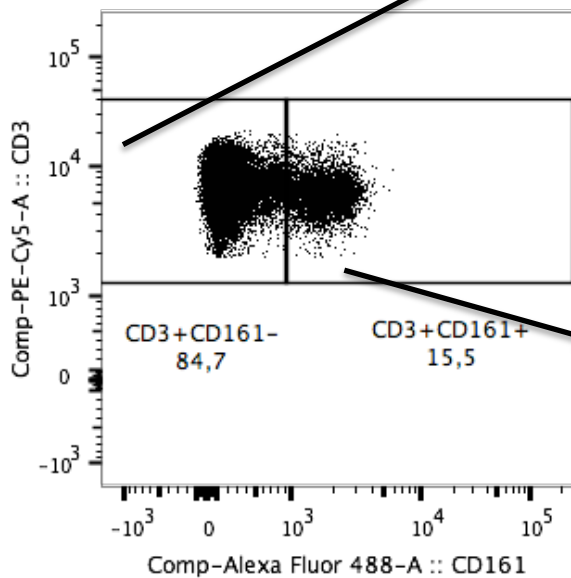

# FMO control

CD3+CD161-CD45RO+FMO

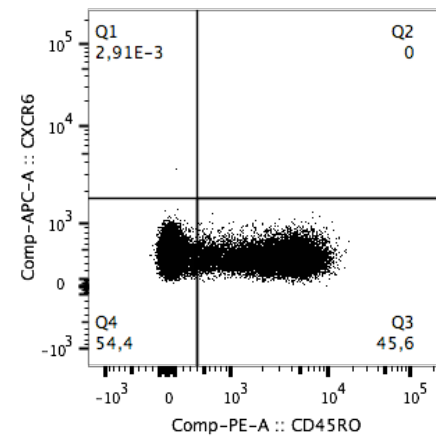

CD3+CD161+CD45RO+FMO

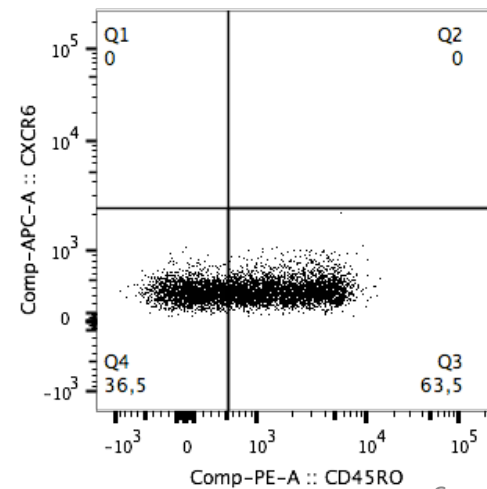

# Sample ID: PTCH13

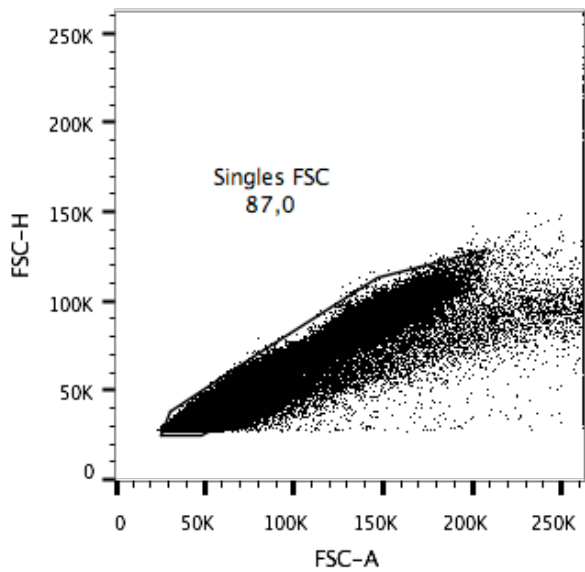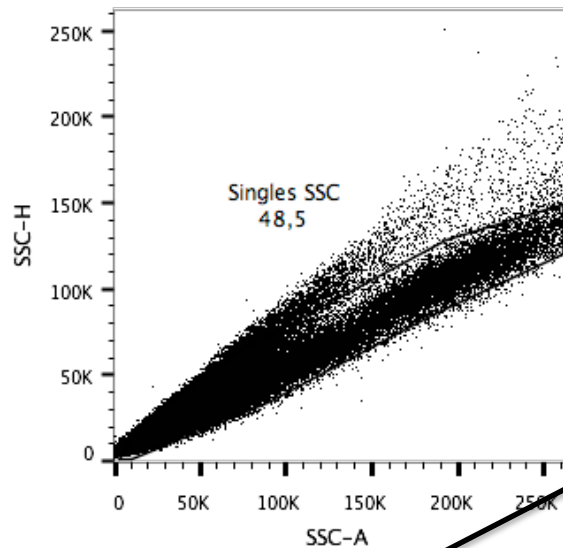

## CD3+CD161-CD45RO+CXCR6+

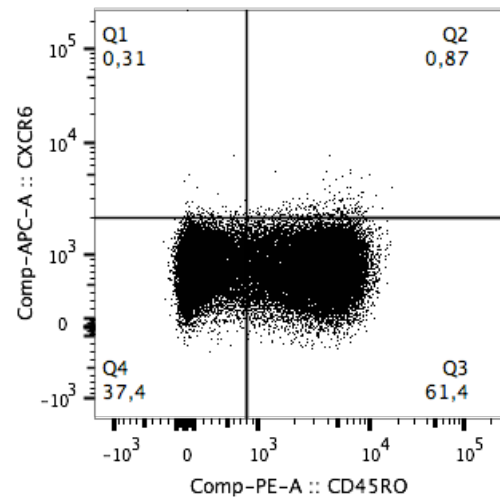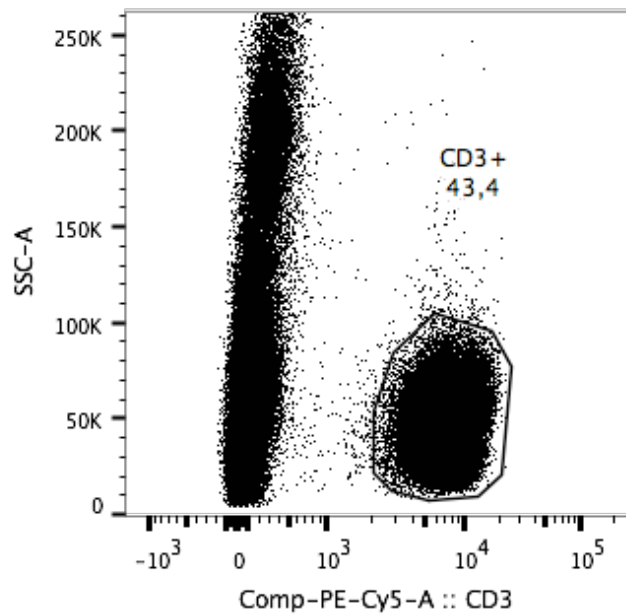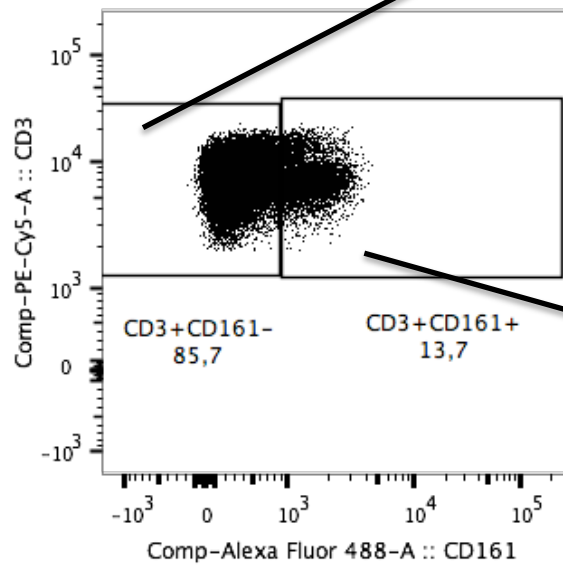

## CD3+CD161+CD45RO+CXCR6+

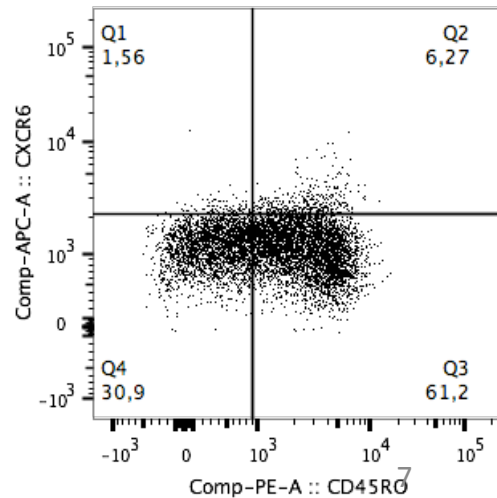

Sample ID: PTCH13

# FMO control

CD3+CD161-CD45RO+FMO

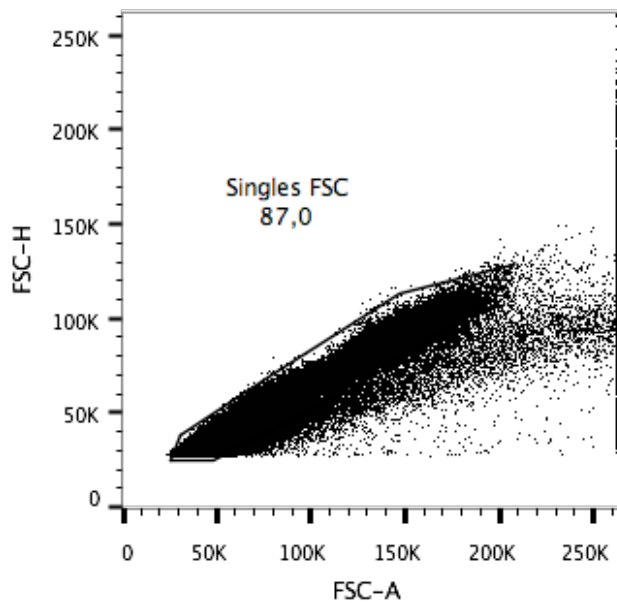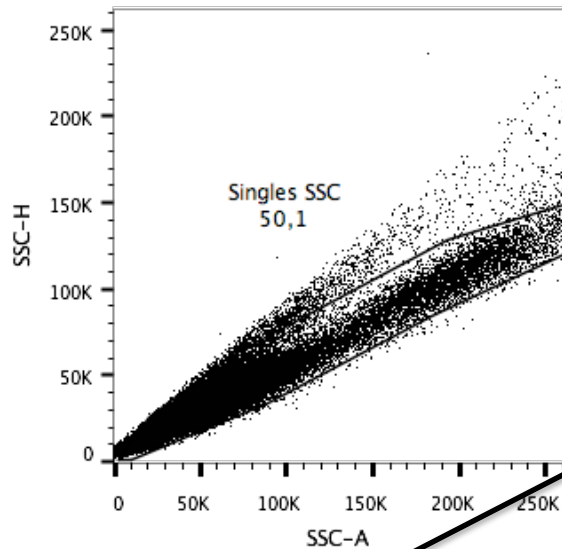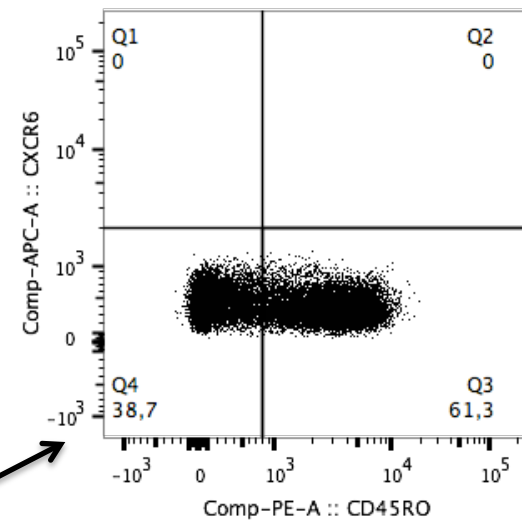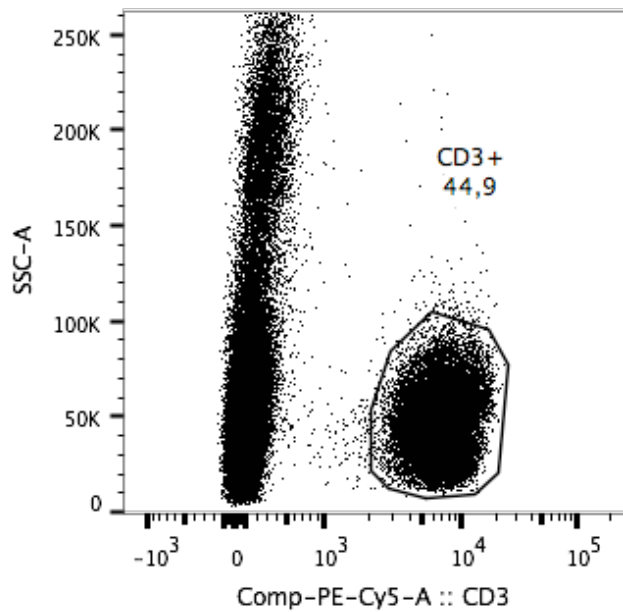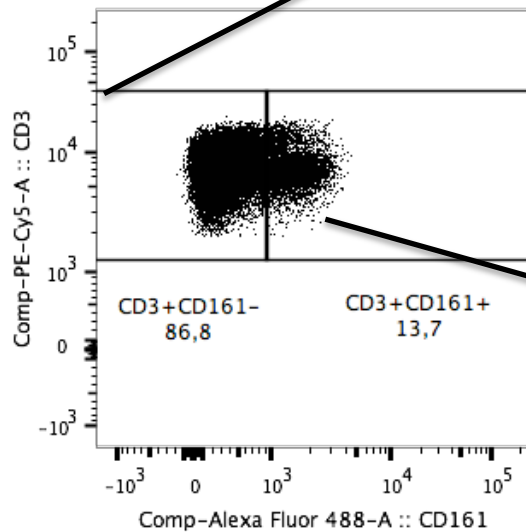

CD3+CD161+CD45RO+FMO

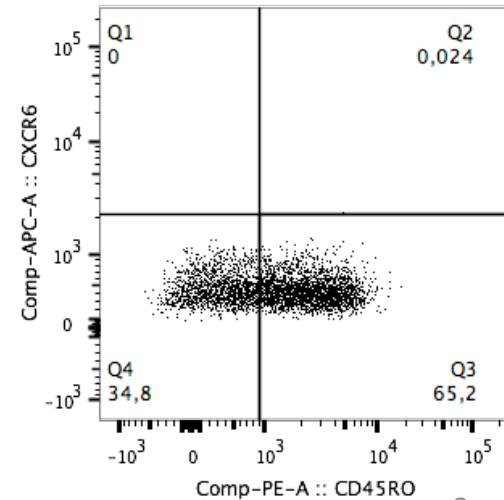



Sample ID: PTCH14

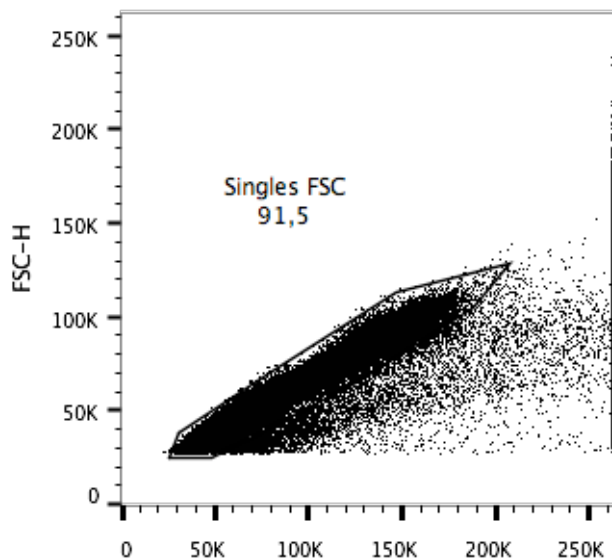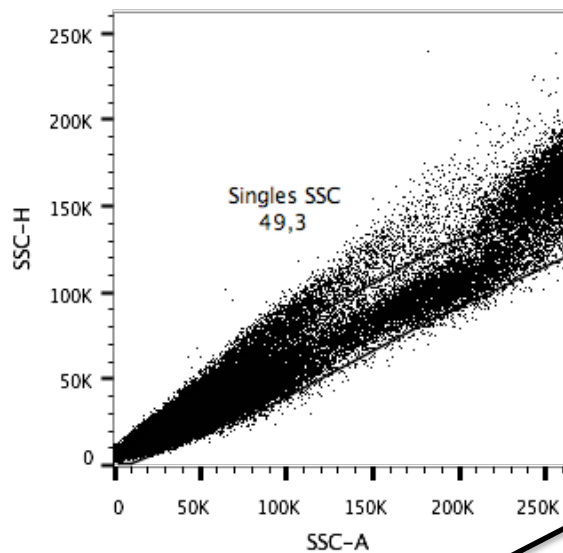

CD3+CD161-CD45RO+CXCR6+

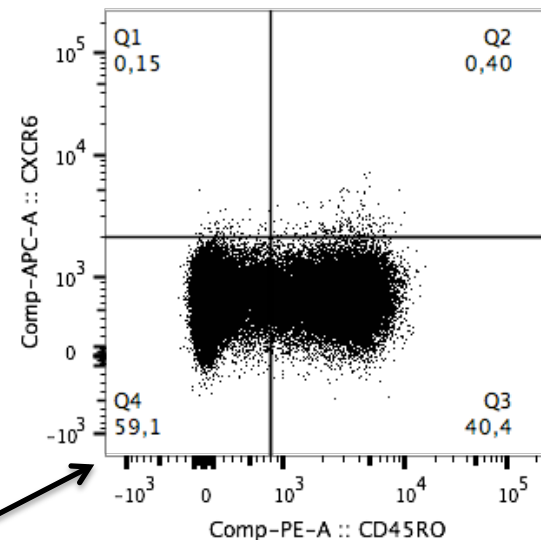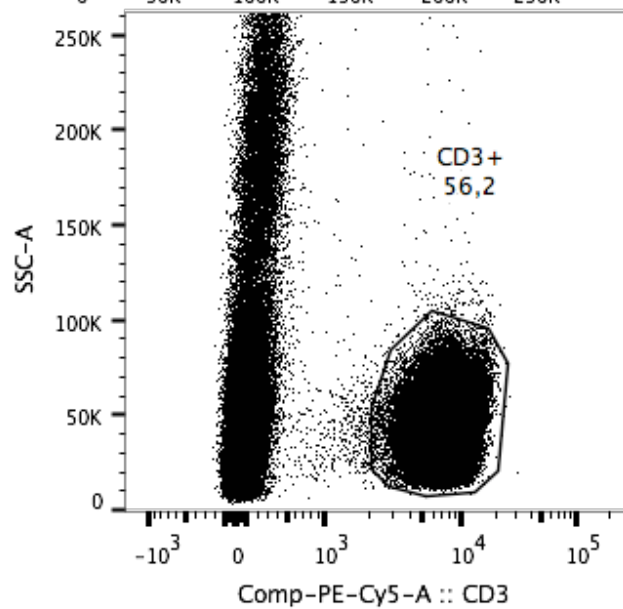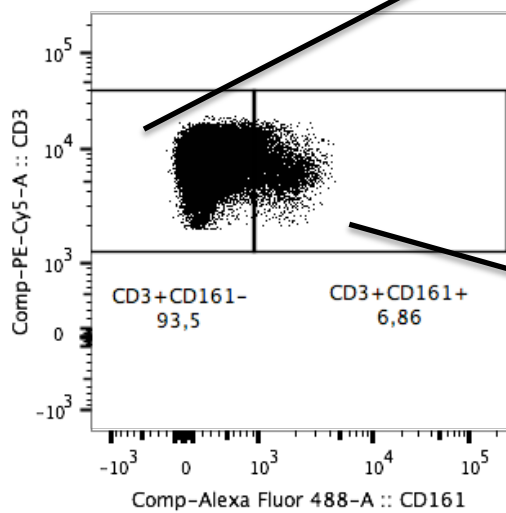

CD3+CD161+CD45RO+CXCR6+

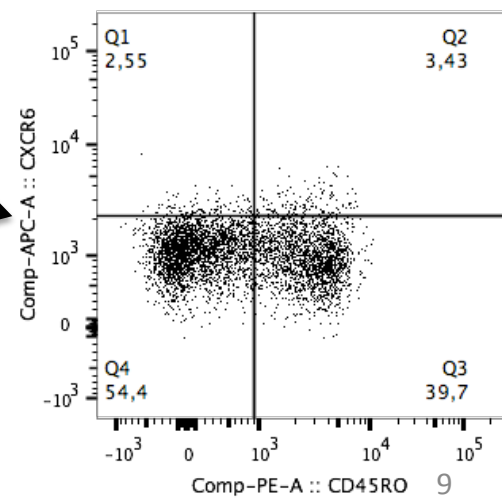

Sample ID: PTCH14

# FMO control

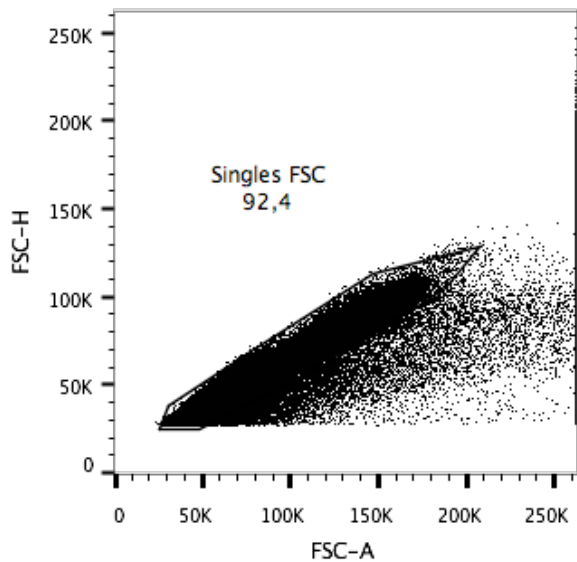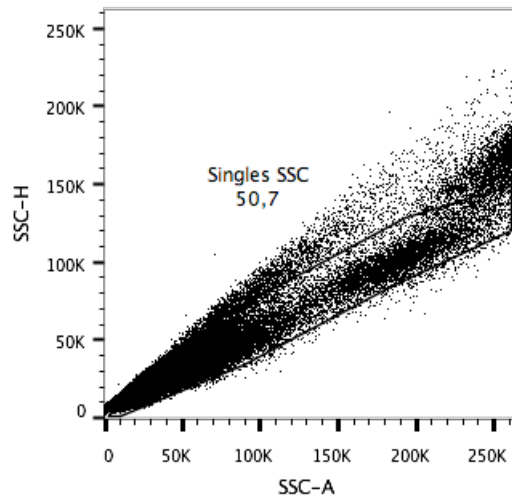

CD3+CD161-CD45RO+FMO

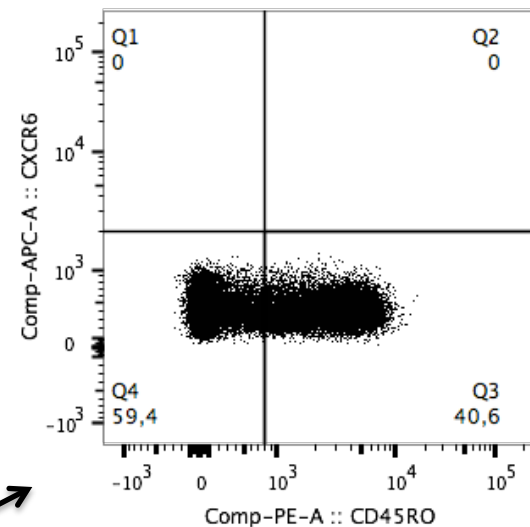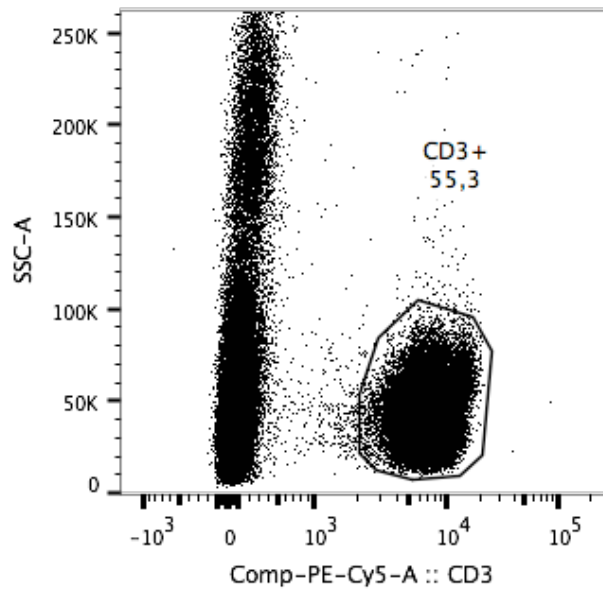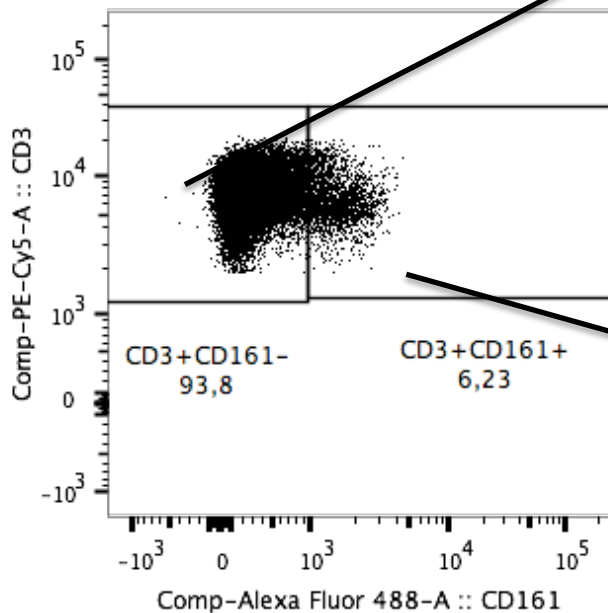

CD3+CD161+CD45RO+FMO

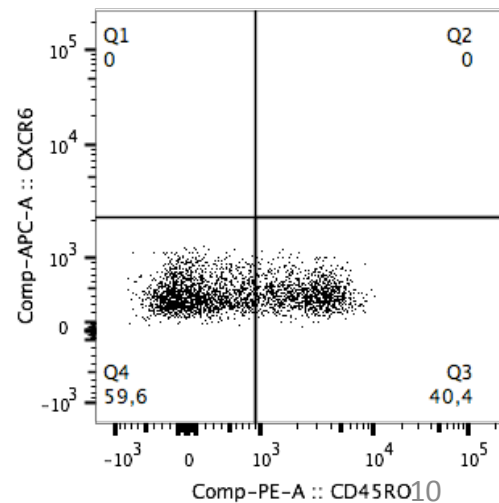

## **PLOS ONE**

CD161 expression defines a Th1/Th17 polyfunctional subset of resident memory T lymphocytes in bronchoalveolar cells

Gonzalez Y. et al.

2.-Individual flow cytometry results of every experiment of CD161 expression on CD3 peripheral lymphocytes.

SSC-Height

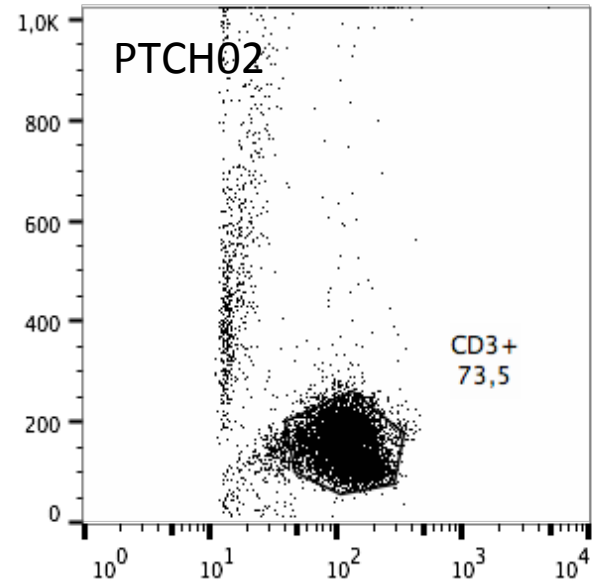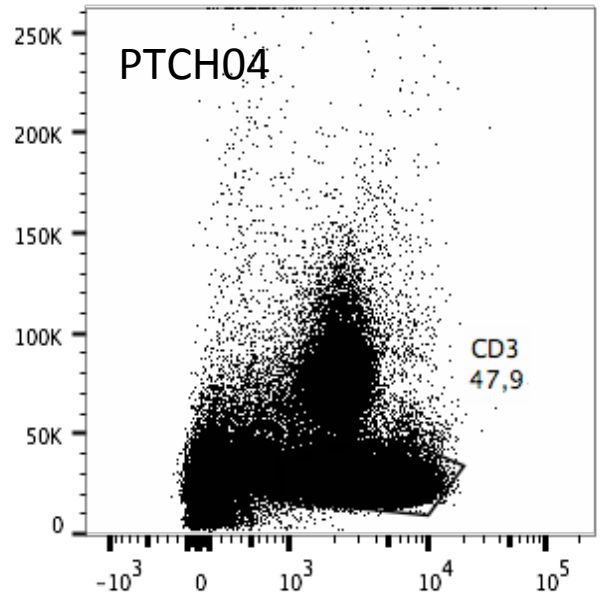

CD3

CD3

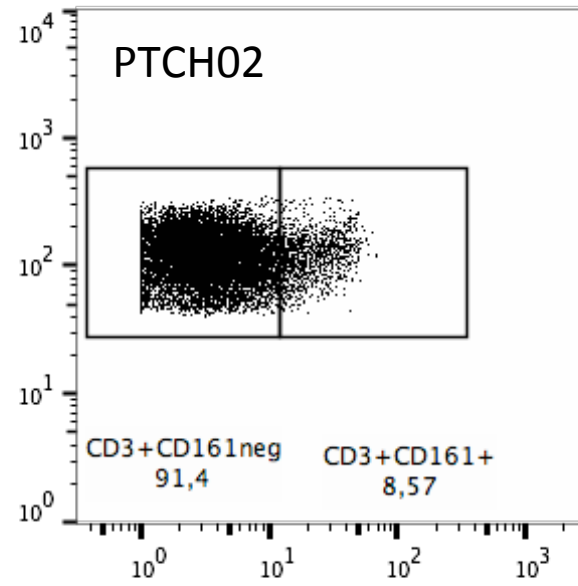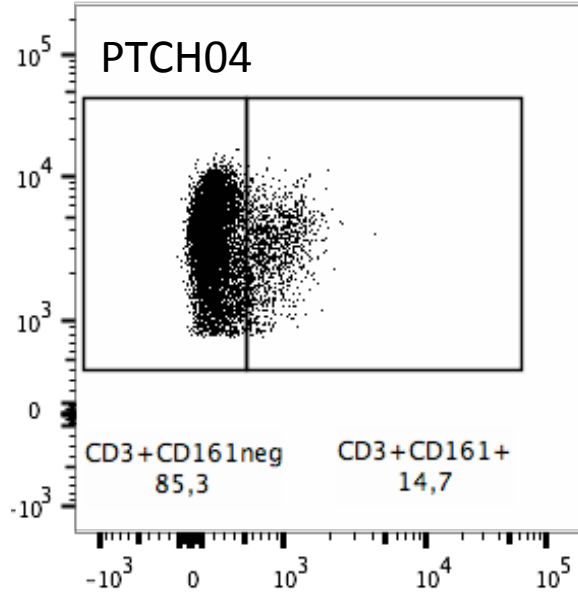

CD161

Isotype controls

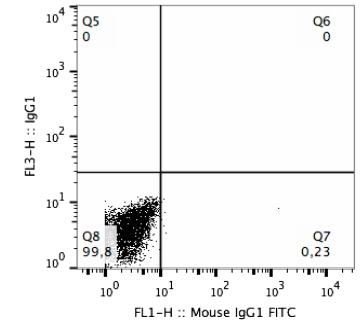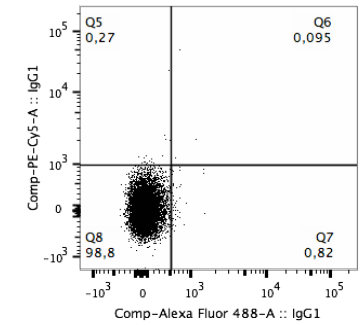

SSC-Height

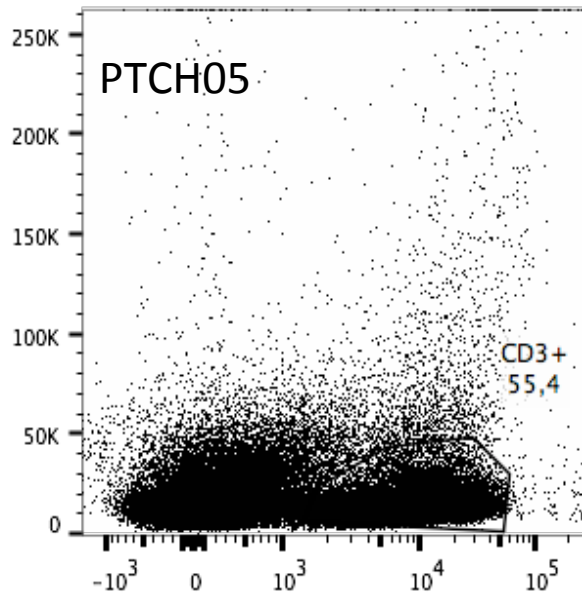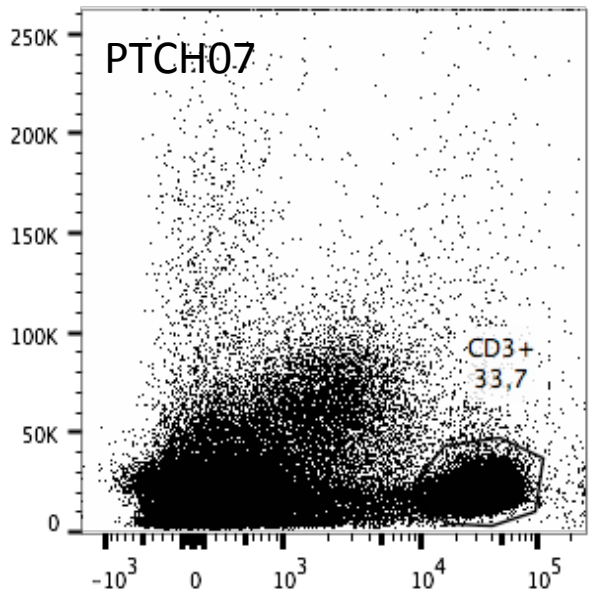

CD3

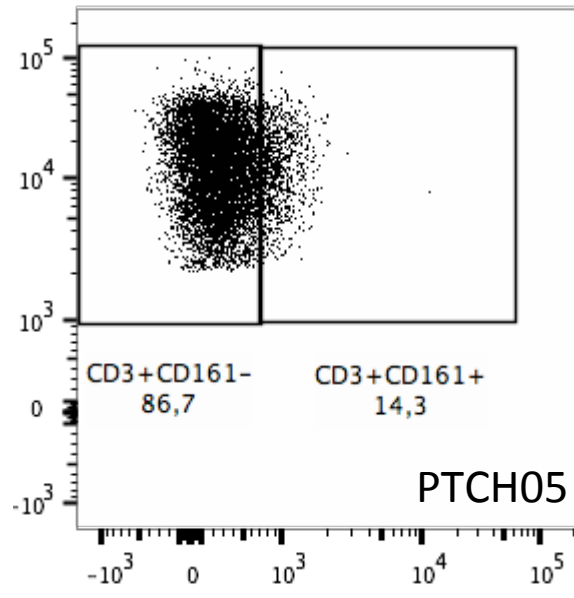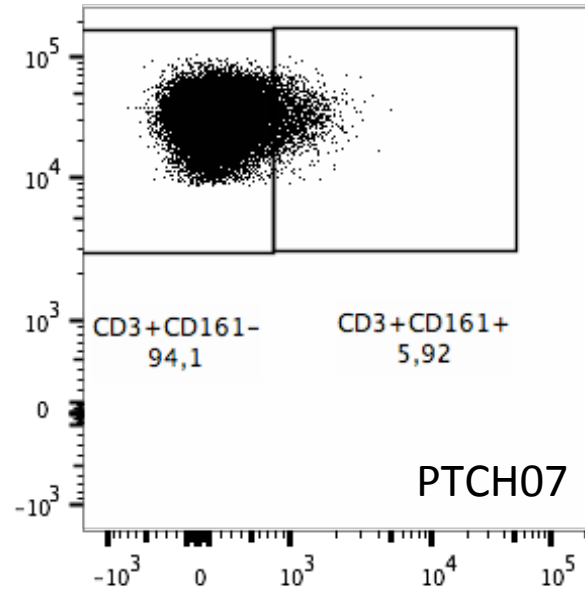

CD161

Isotype controls

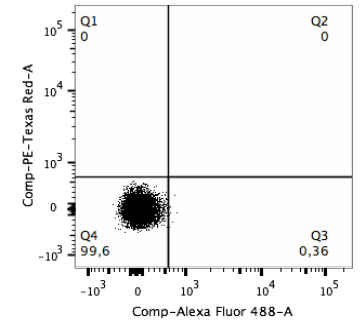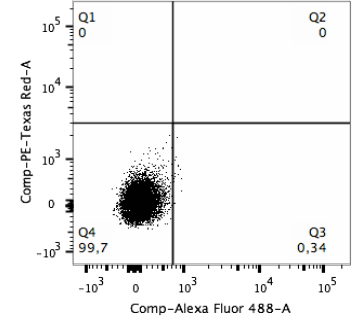

SSC-Height

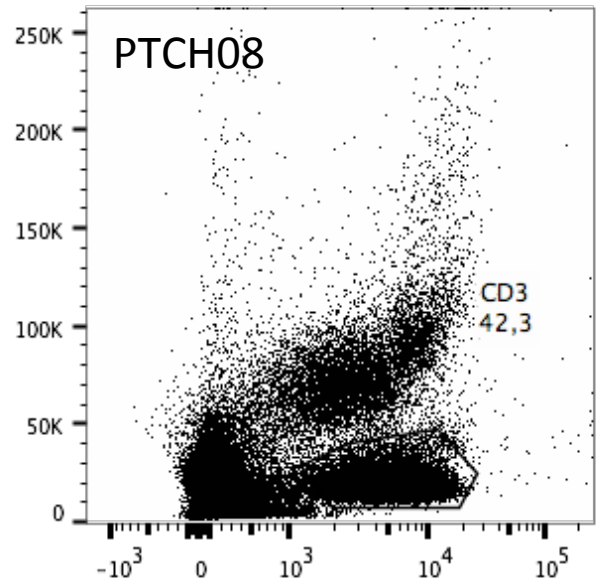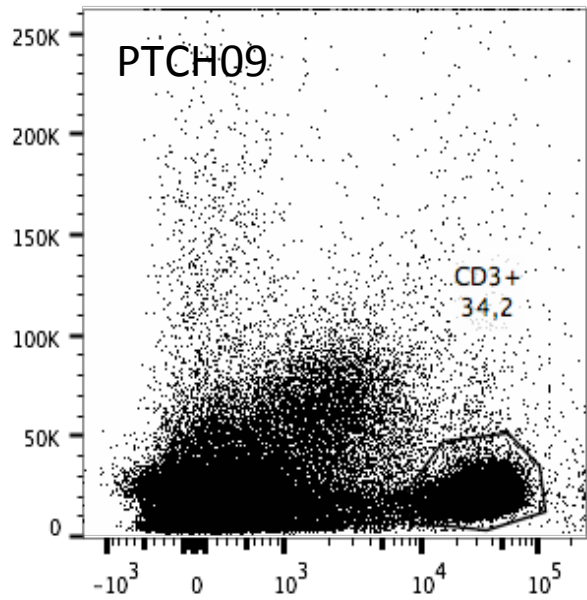

CD3

CD3

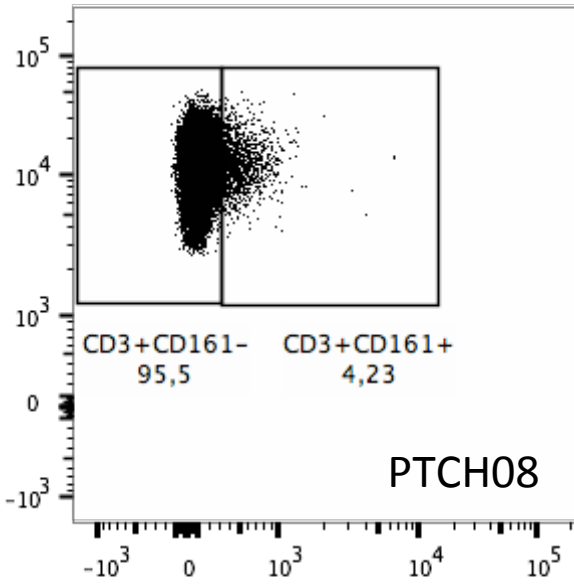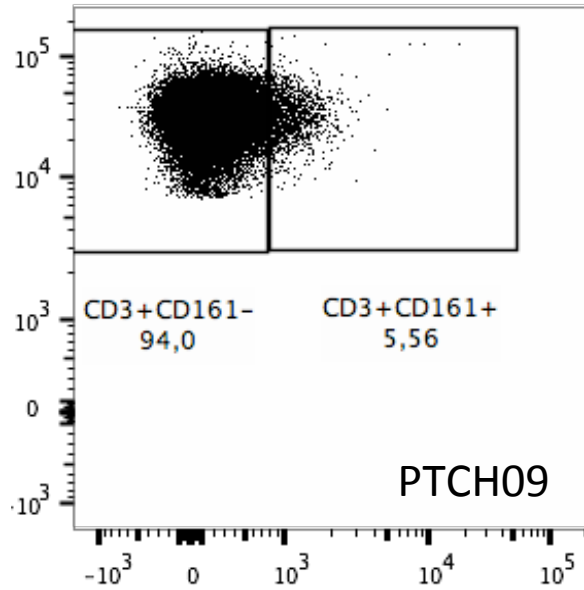

CD161

Isotype controls

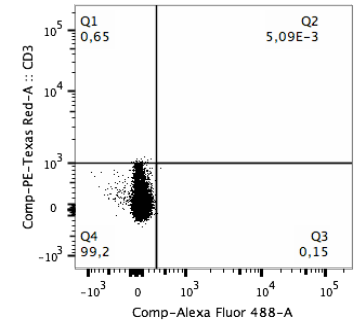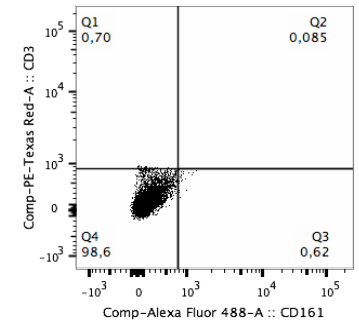

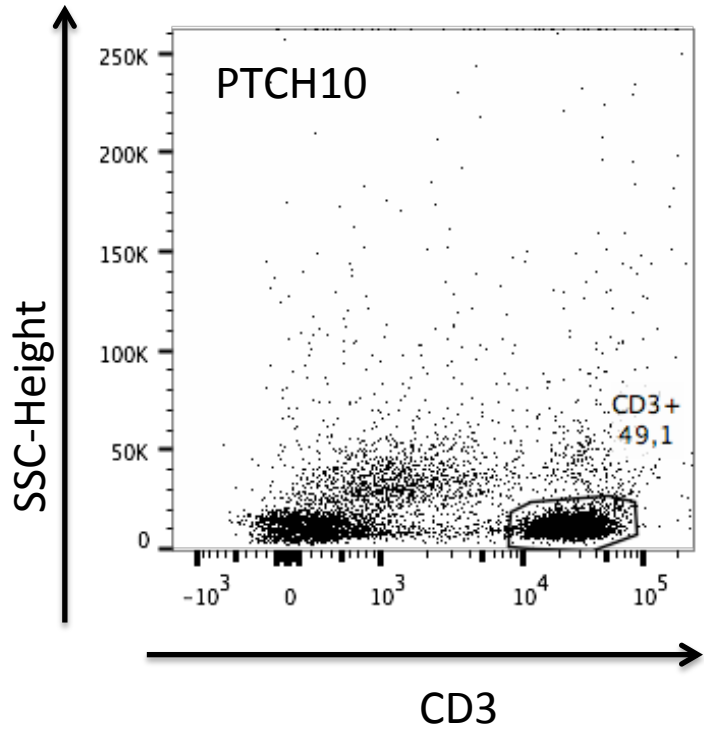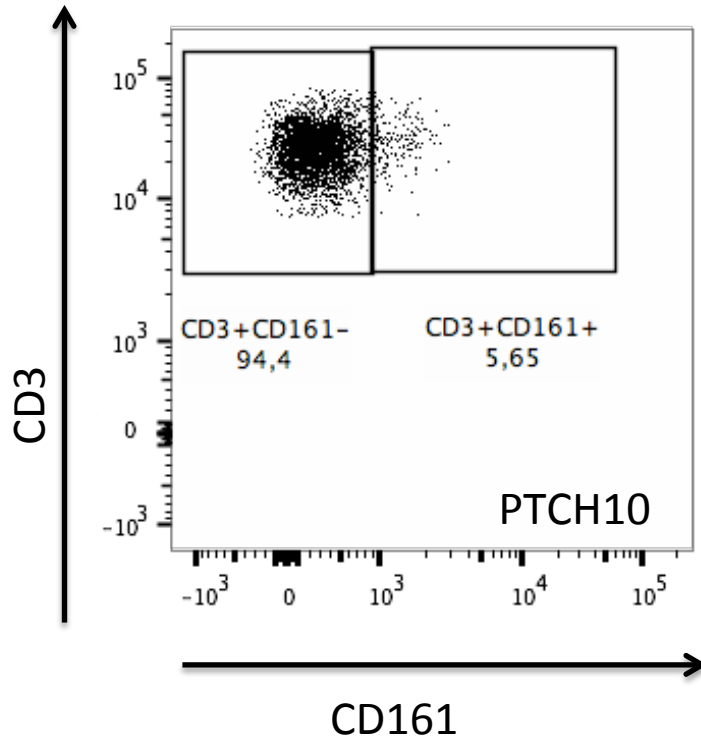

### Isotype controls

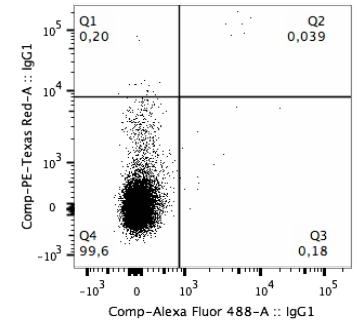

## **PLOS ONE**

CD161 expression defines a Th1/Th17 polyfunctional subset of resident memory T lymphocytes in bronchoalveolar cells

Gonzalez Y. et al.

3.-Individual flow cytometry results of every experiment of CD161 expression on CD3 alveolar lymphocytes.



Isotype controls

SSC-Height

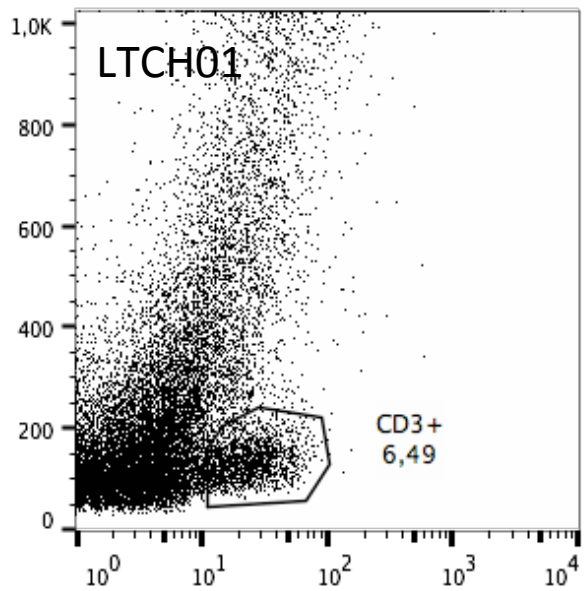

CD3

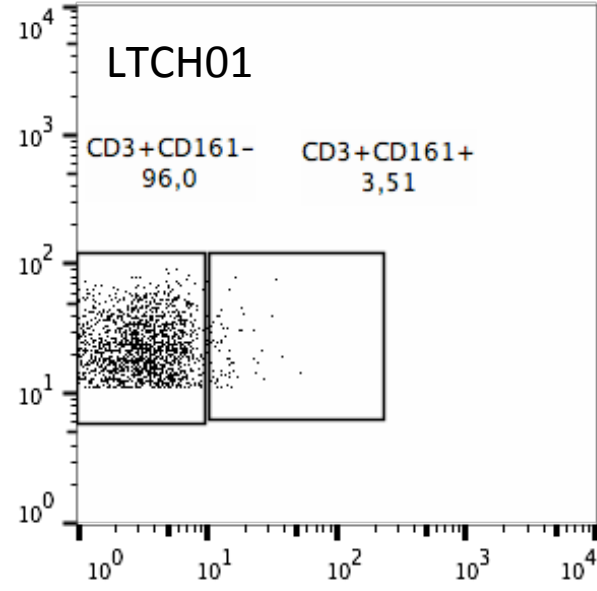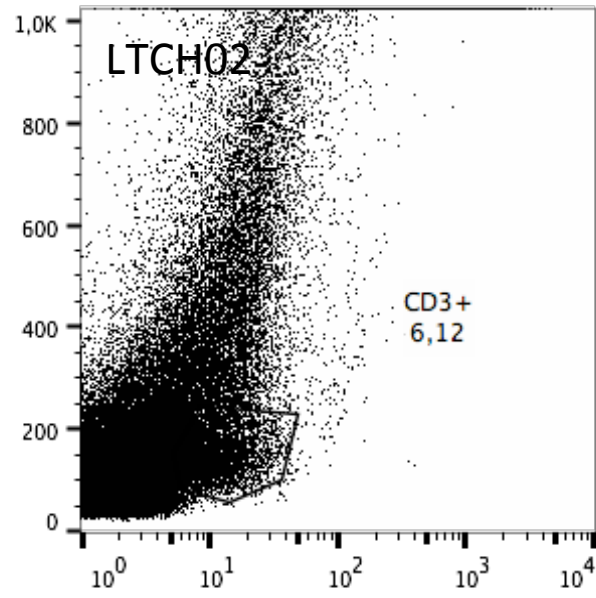

CD3

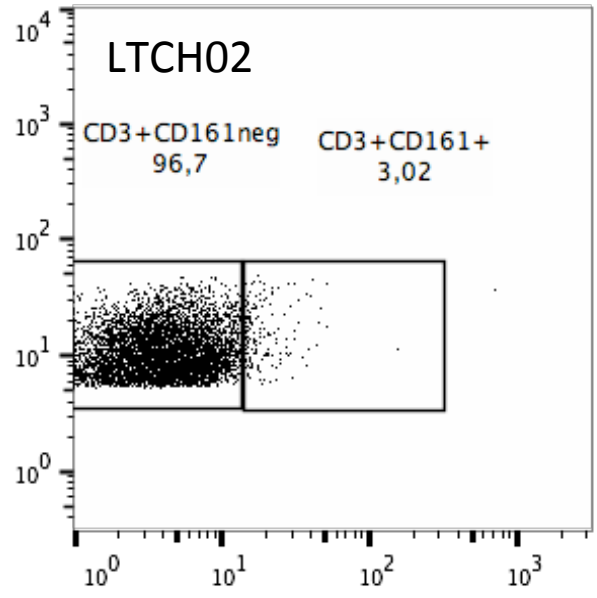

CD161

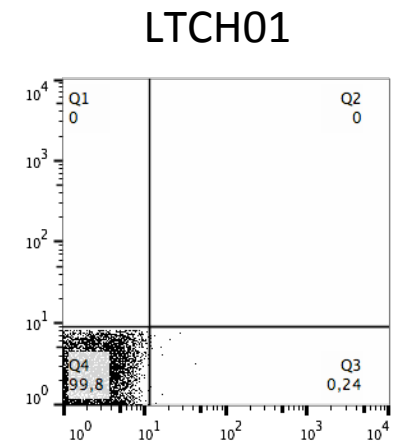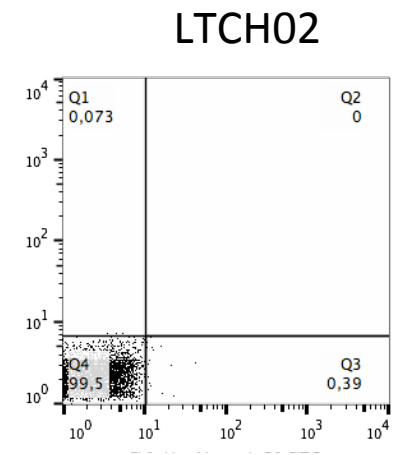

SSC-Height

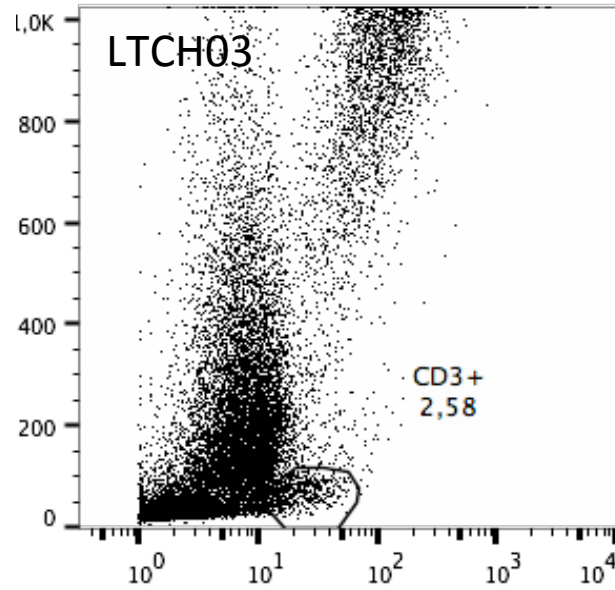

CD3

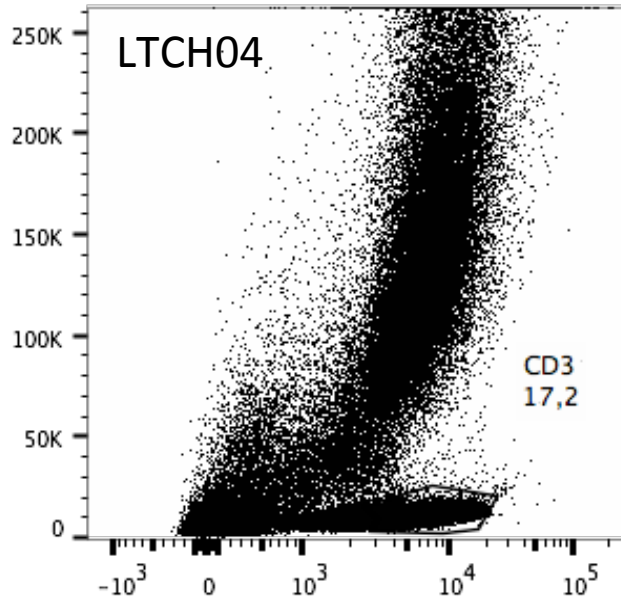

CD3

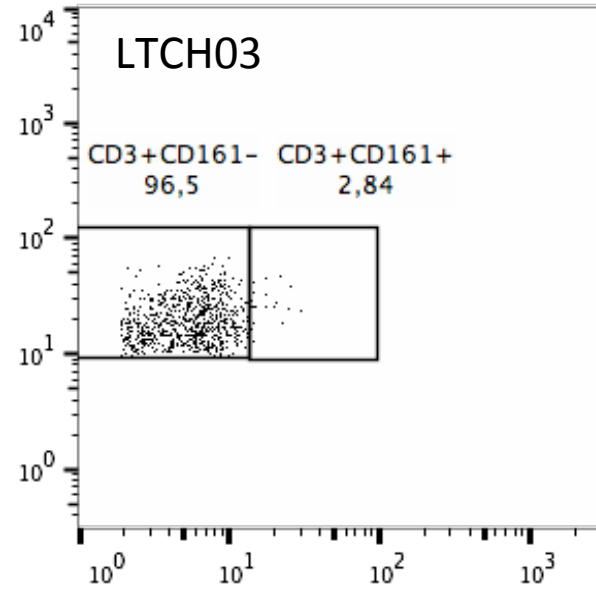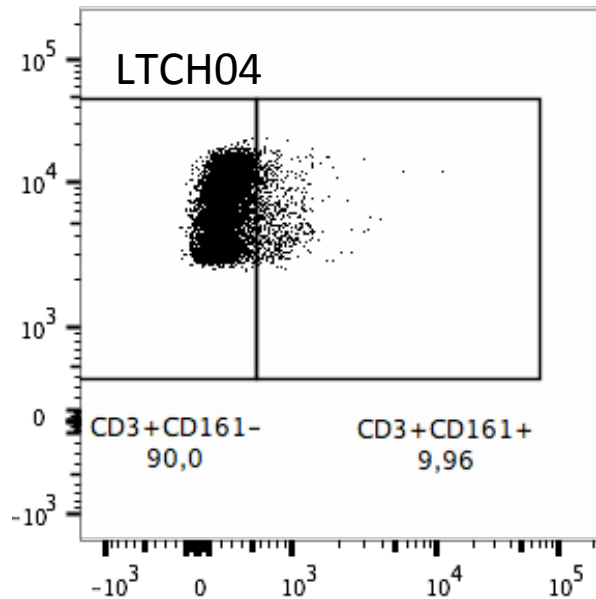

CD161

Isotype controls

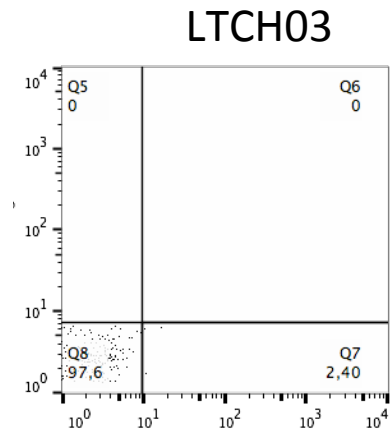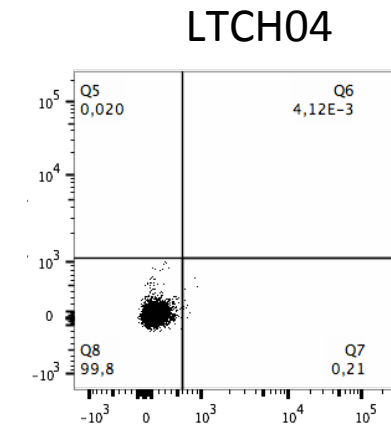

SSC-Height

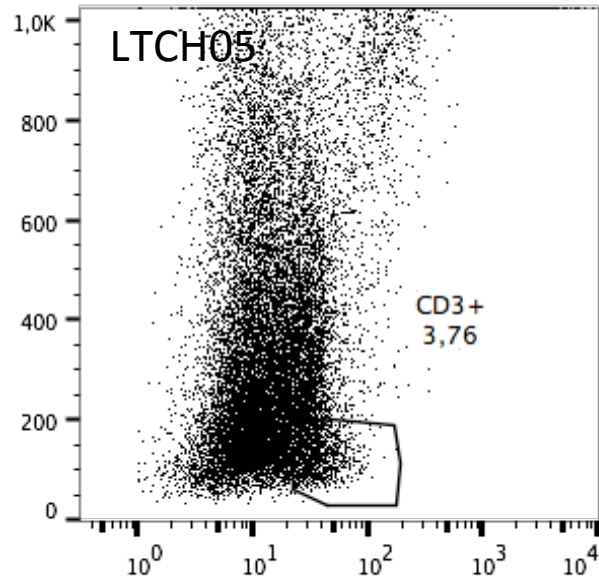

CD3

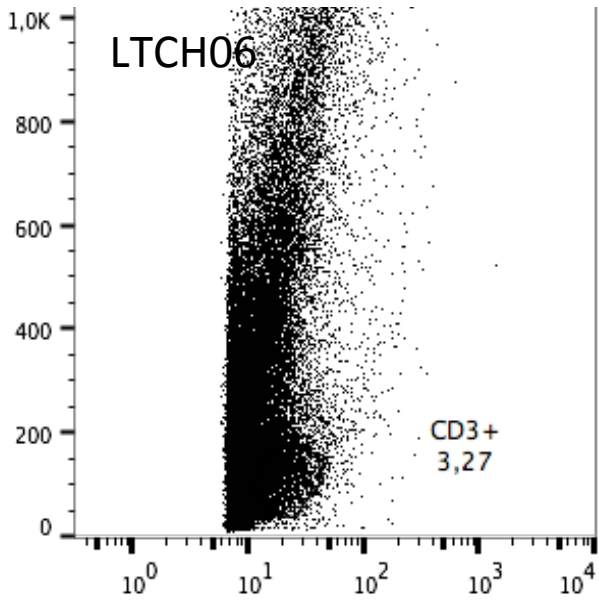

CD3

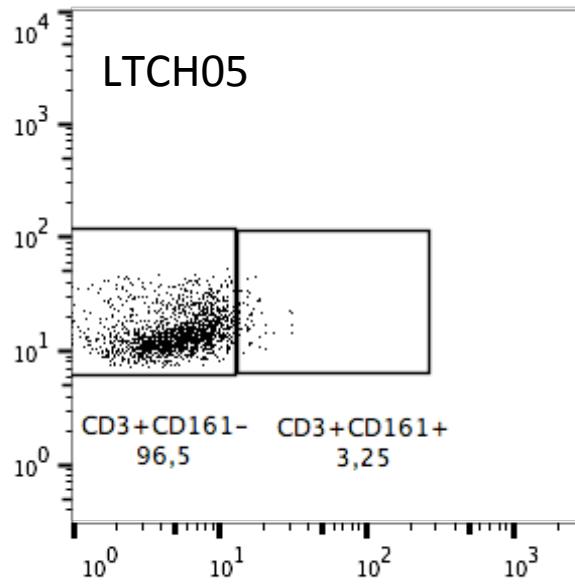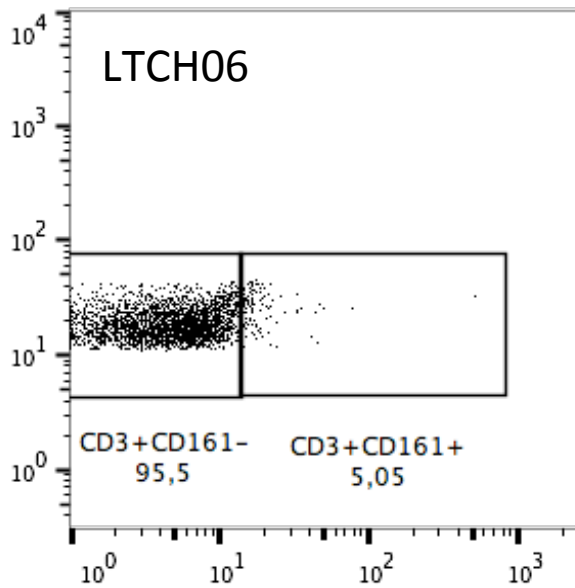

CD161

Isotype controls

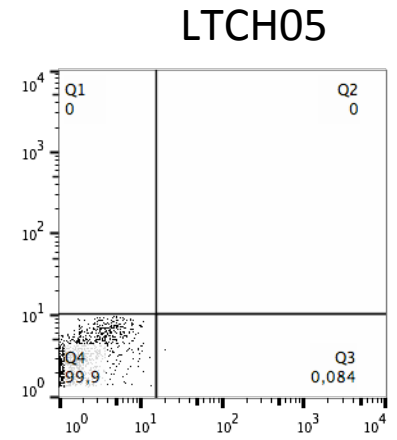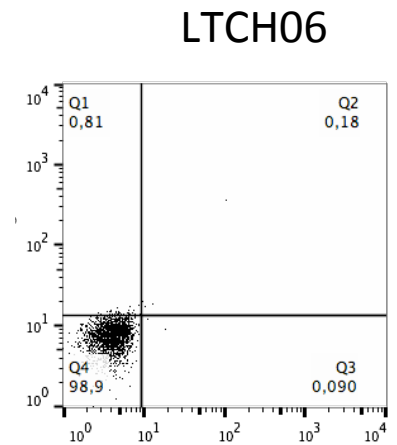

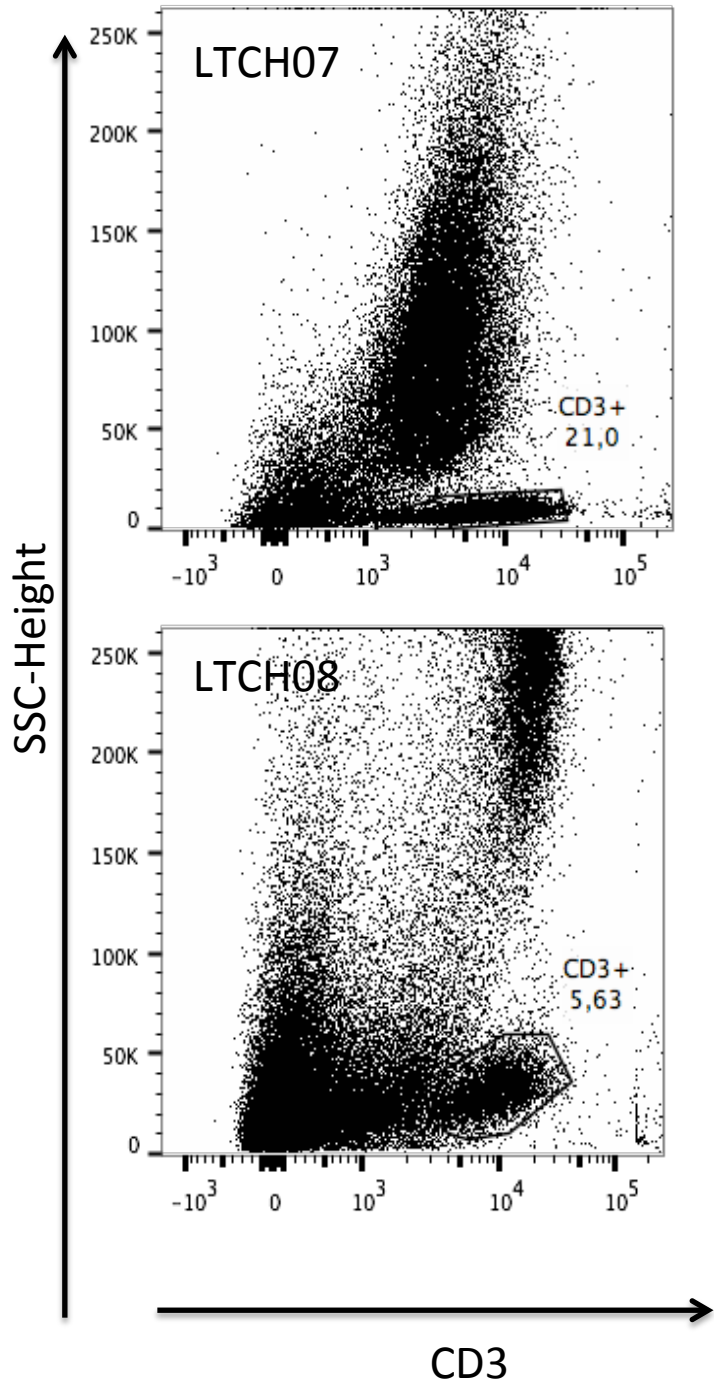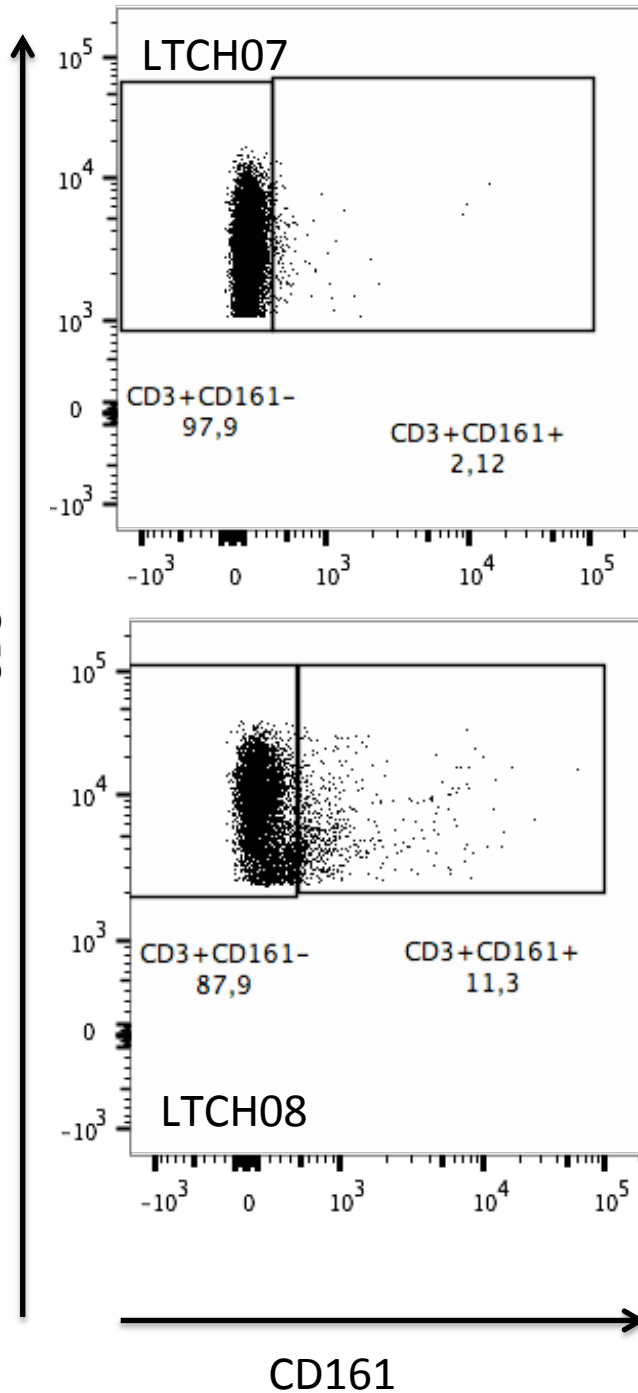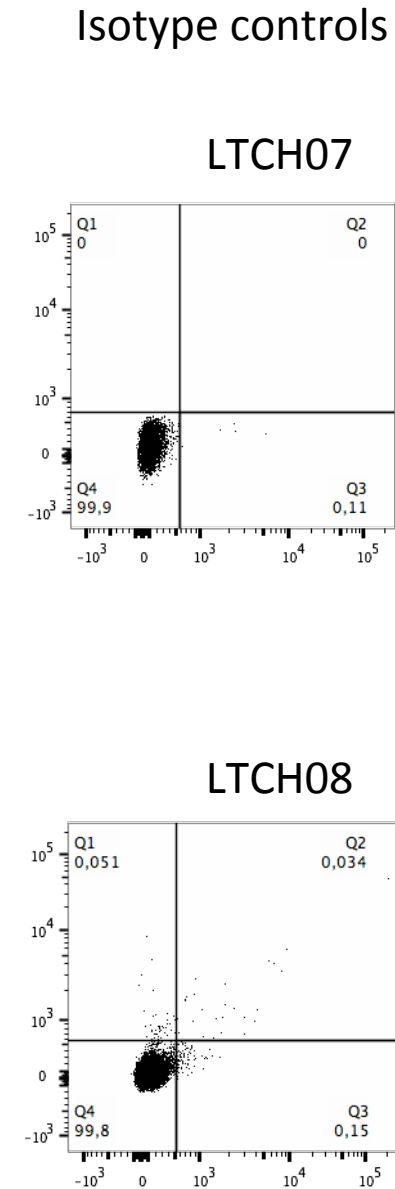

SSC-Height

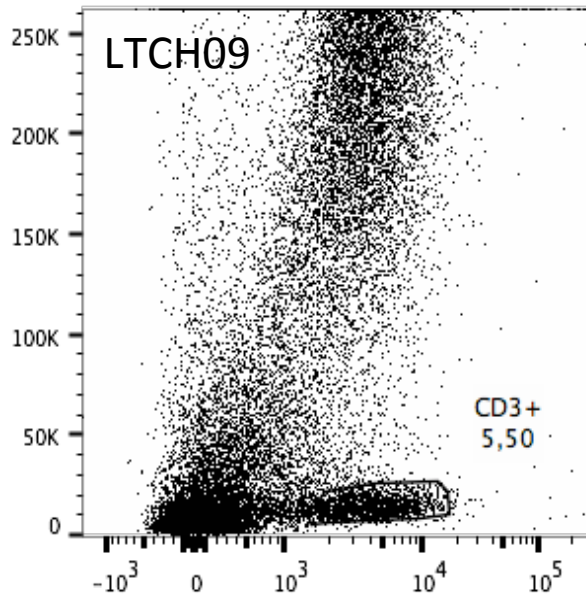

CD3

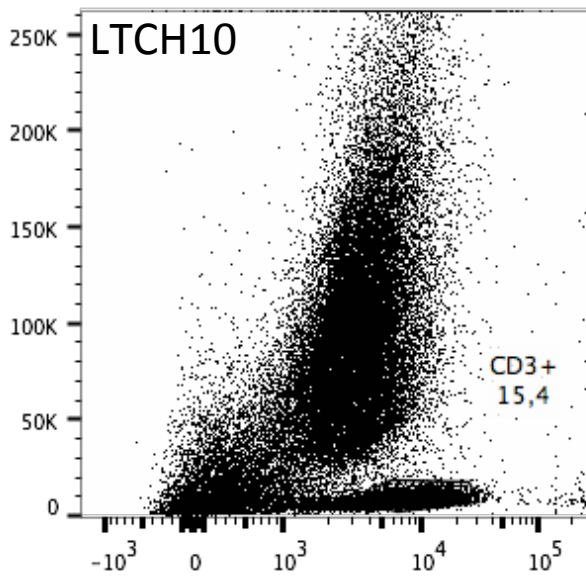

CD3

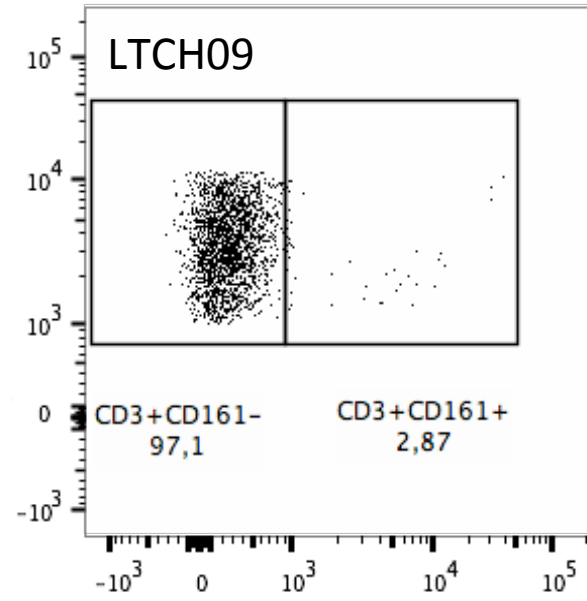

CD161

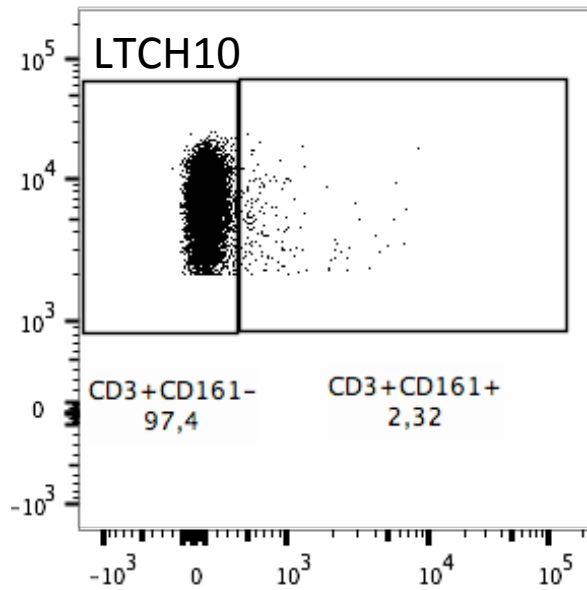

Isotype controls

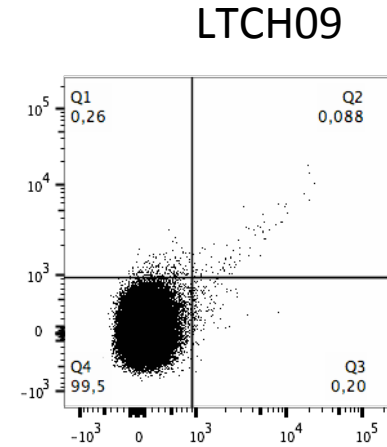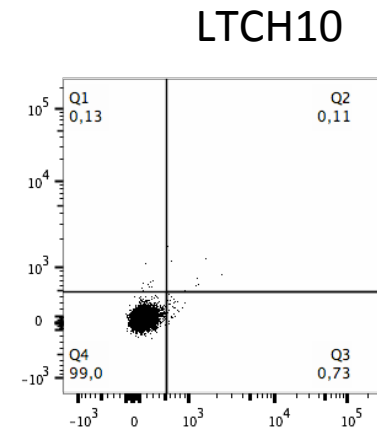

## **PLOS ONE**

CD161 expression defines a Th1/Th17 polyfunctional subset of resident memory T lymphocytes in bronchoalveolar cells

Gonzalez Y. et al.

4.-Individual flow cytometry results of every experiment of CD45RO expression on CD161+ alveolar lymphocytes.

# Isotype control

LTCH06

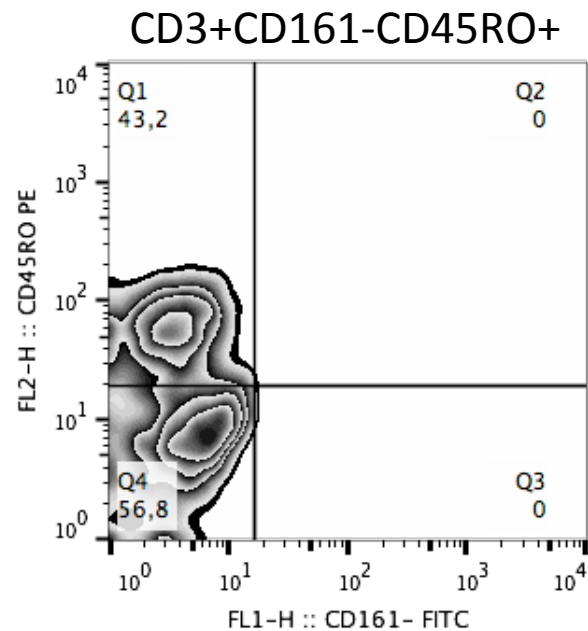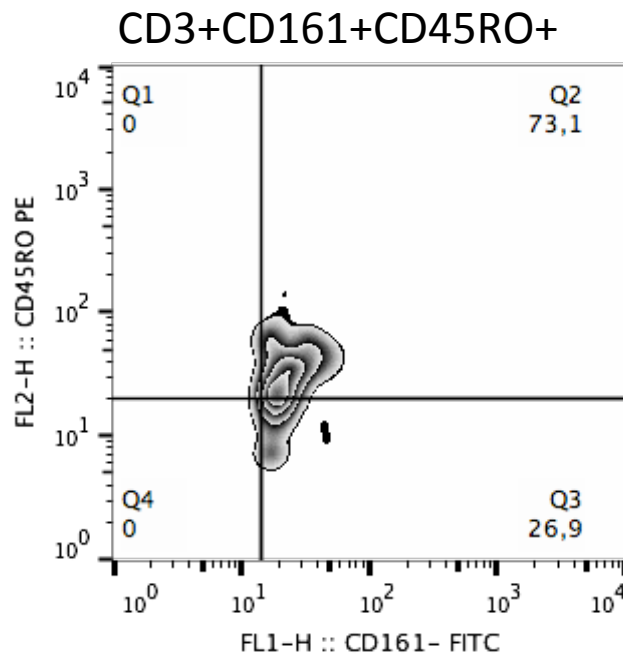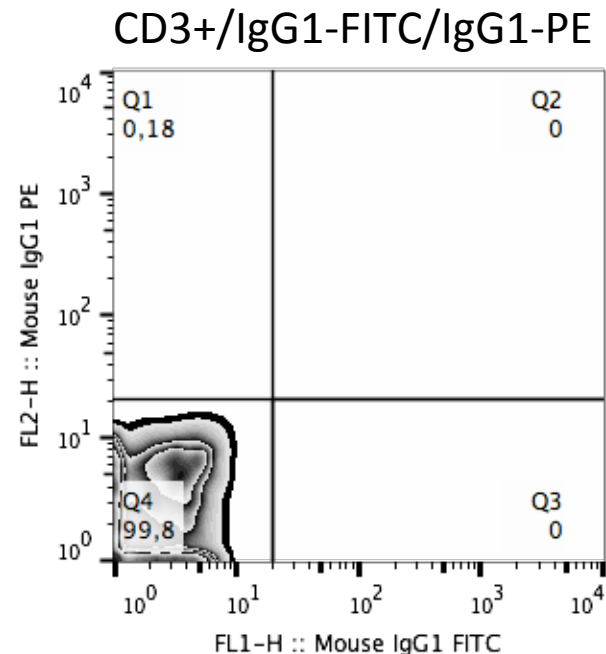

LTCH07

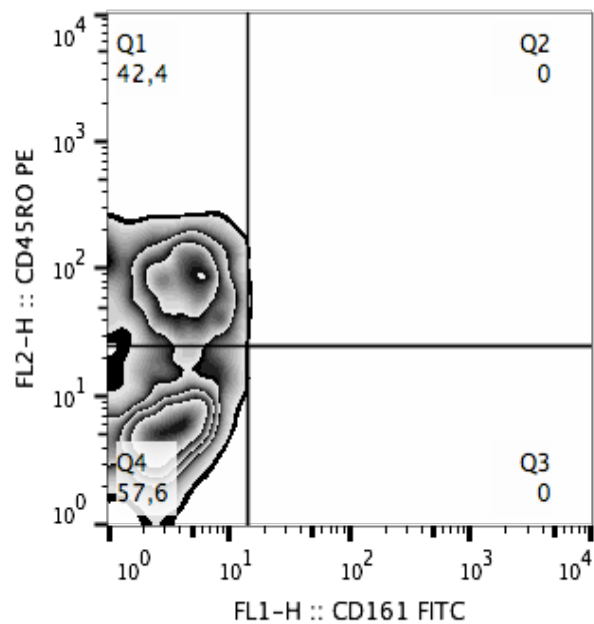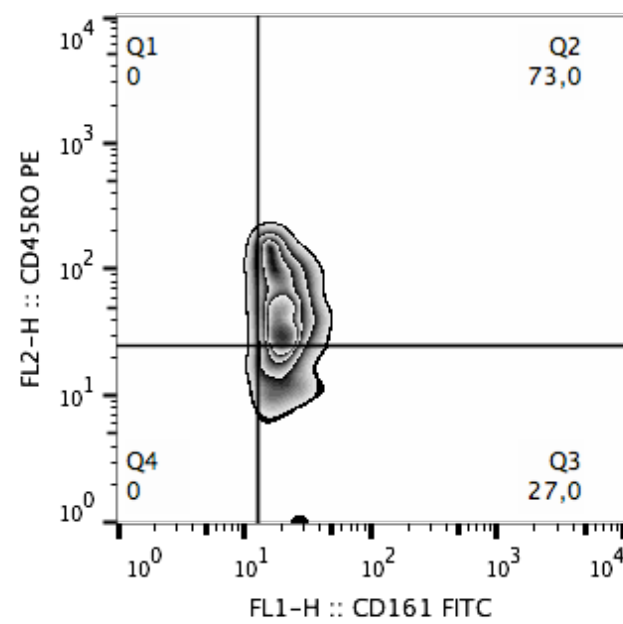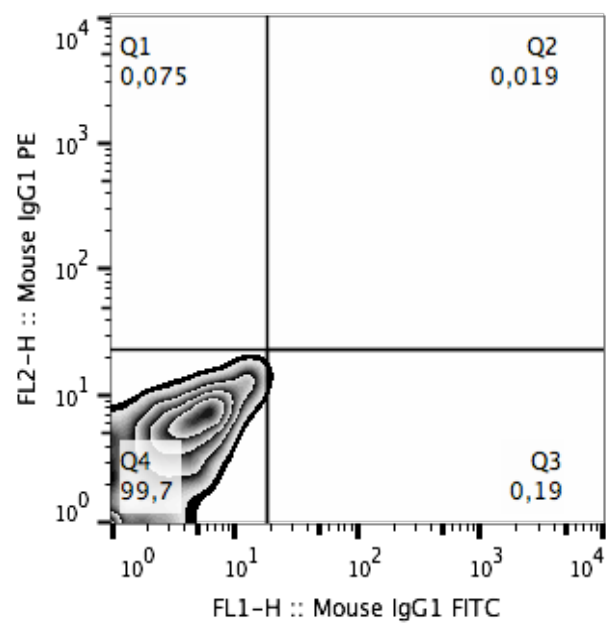

LTCH08

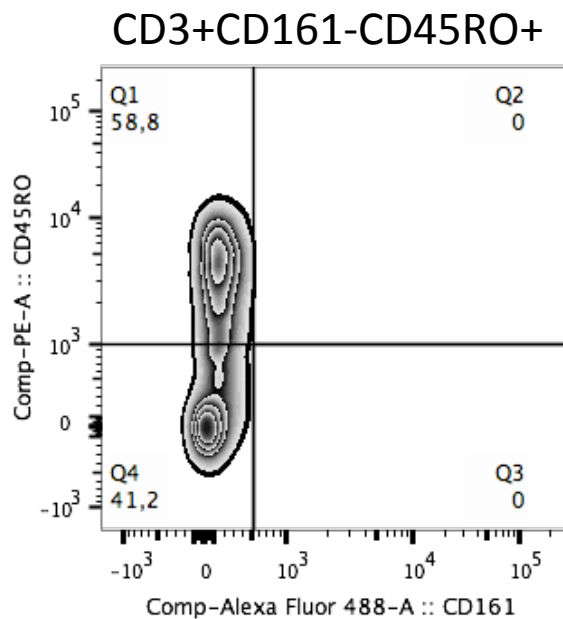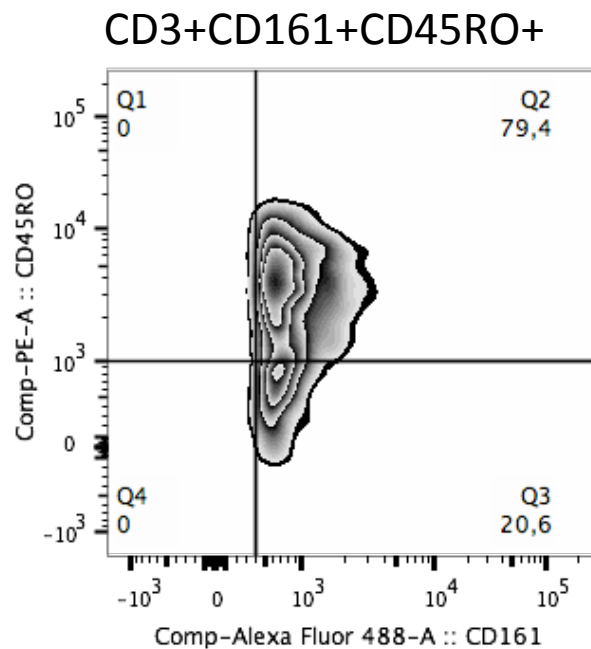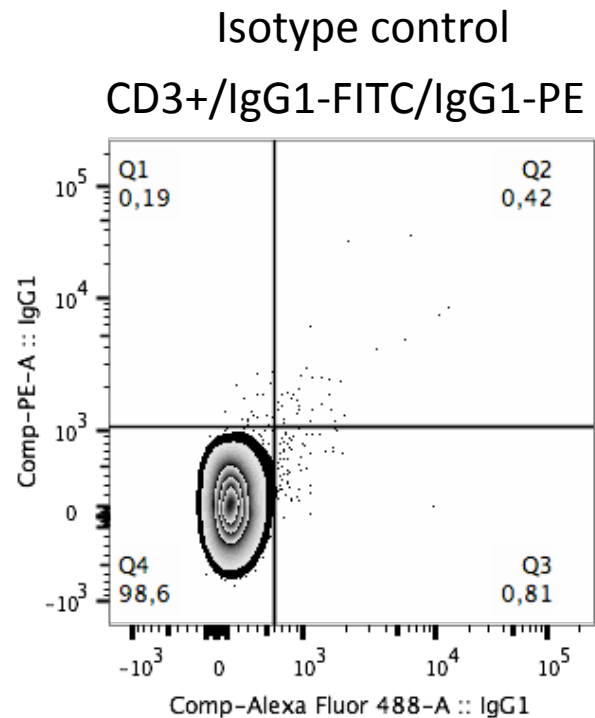

LTCH09

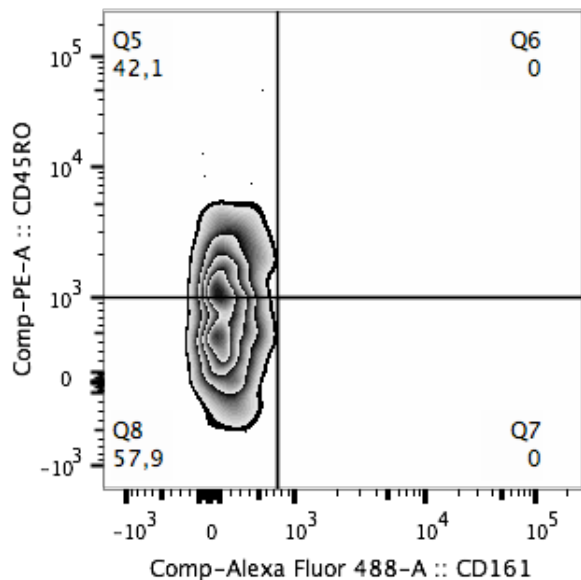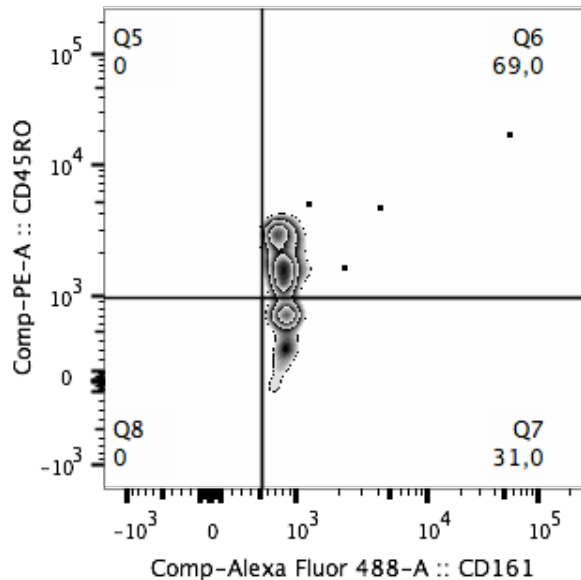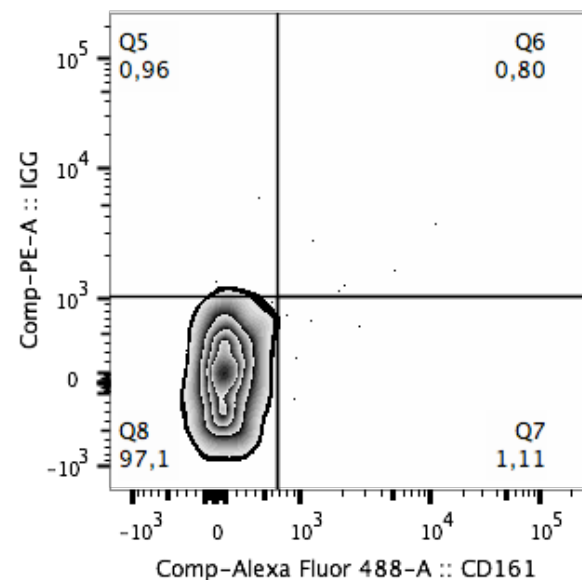



5.-Cytokines produced by CD161+ alveolar and peripheral cells.

Sample ID: LTCH04

CD3+CD161-IFN $\gamma$ +

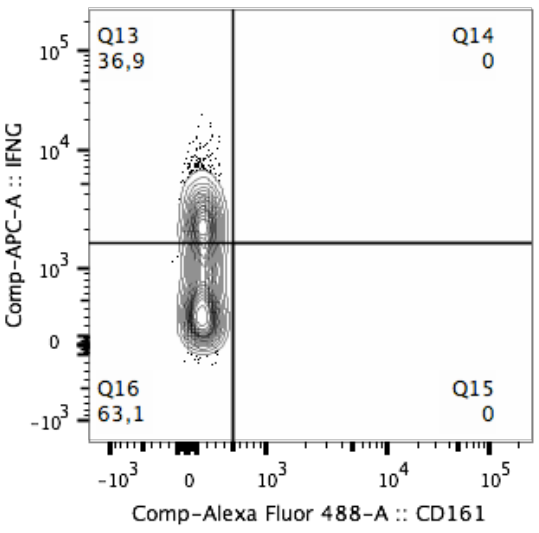

CD3+CD161+IFN $\gamma$ +

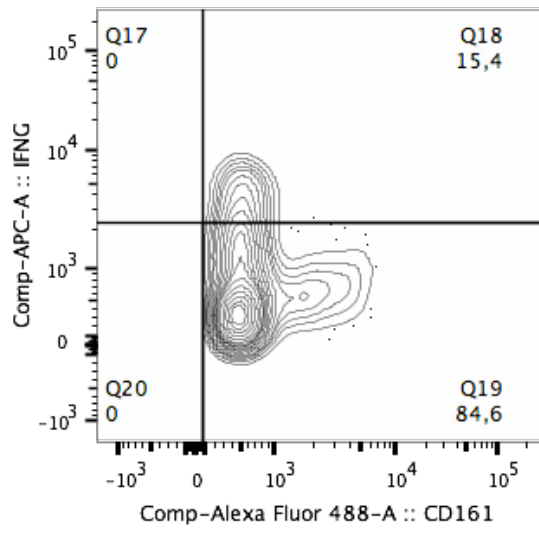

Isotype controls

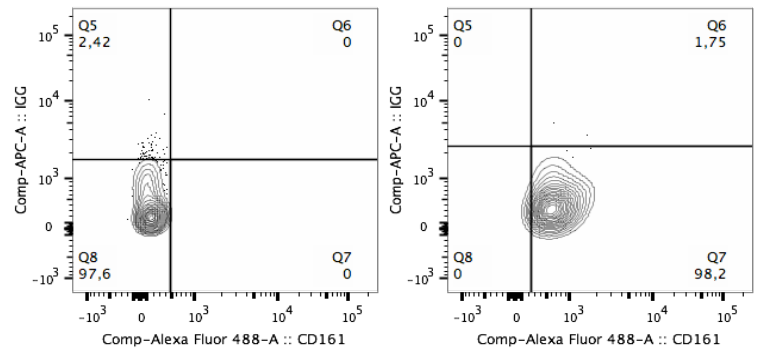

CD3+CD161-TNF $\alpha$ +

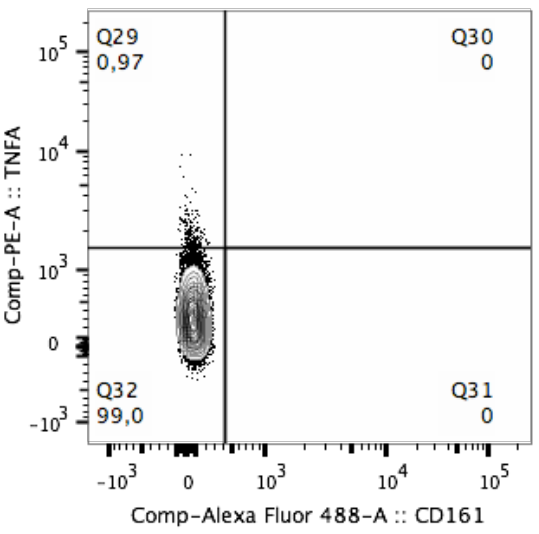

CD3+CD161+TNF $\alpha$ +

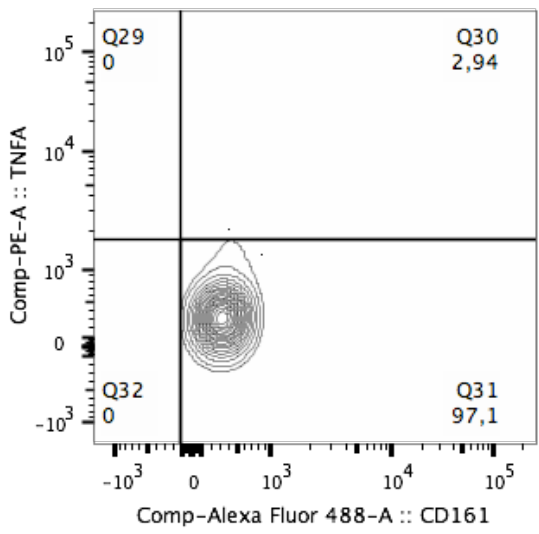

Isotype controls

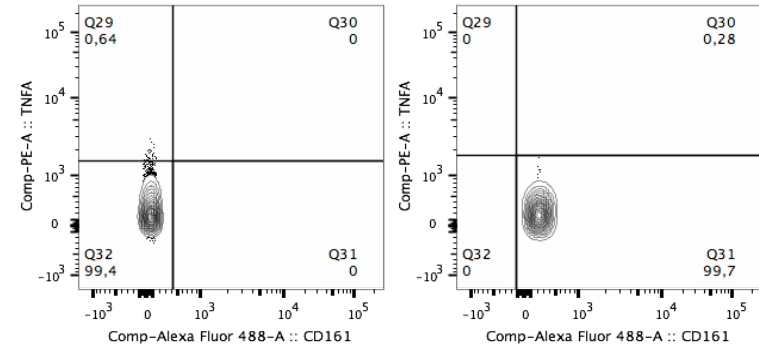

Sample ID: LTCH04

CD3+CD161-IL-17+

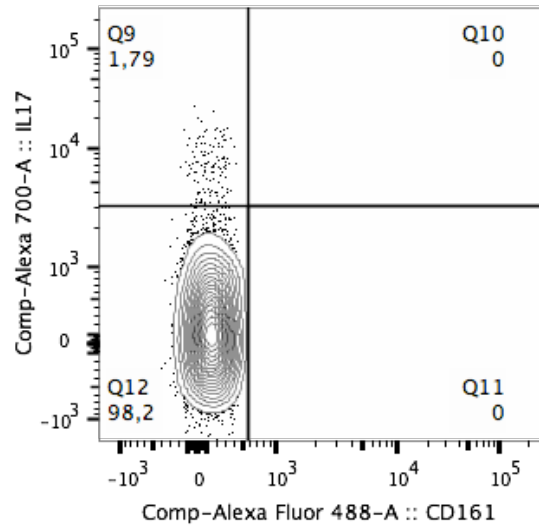

CD3+CD161+IL-17+

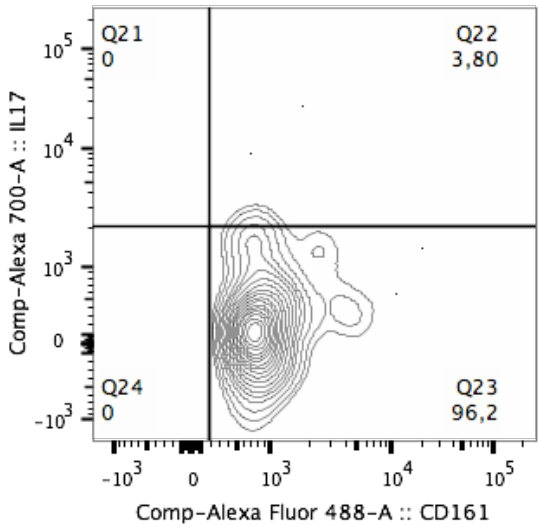

Isotype controls

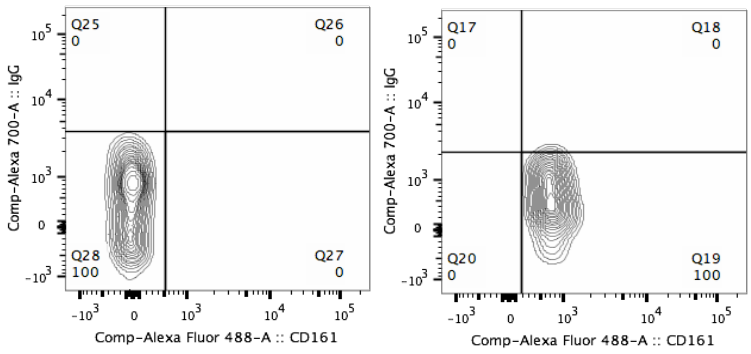

Sample ID: PTCH04

CD3+CD161-IFN $\gamma$ +

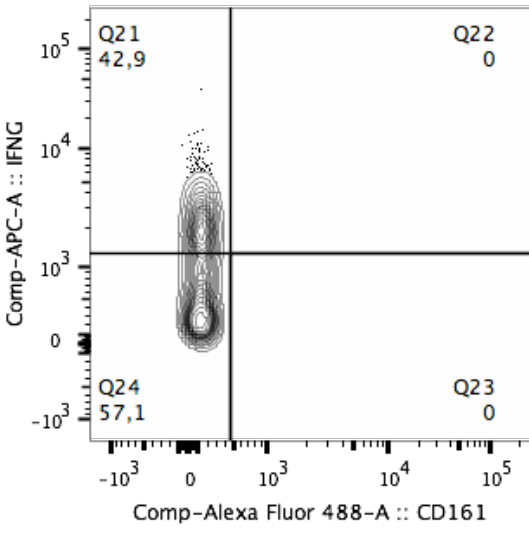

CD3+CD161+IFN $\gamma$ +

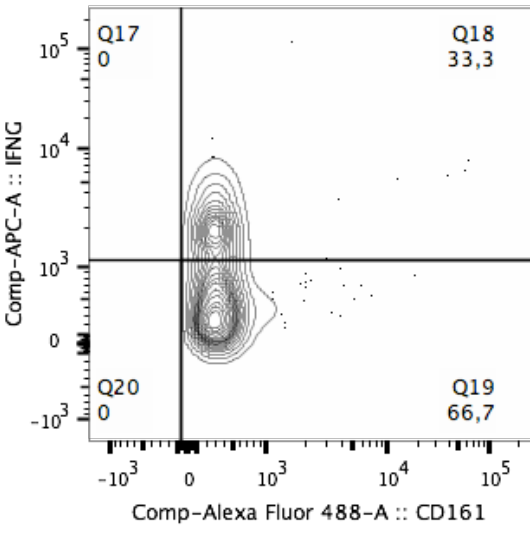

Isotype controls

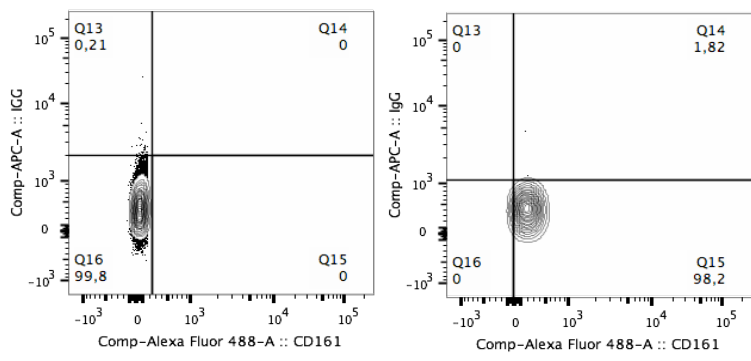

CD3+CD161-TNF $\alpha$ +

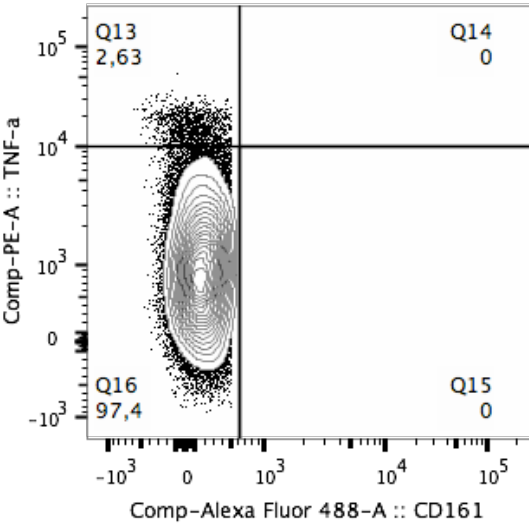

CD3+CD161+TNF $\alpha$ +

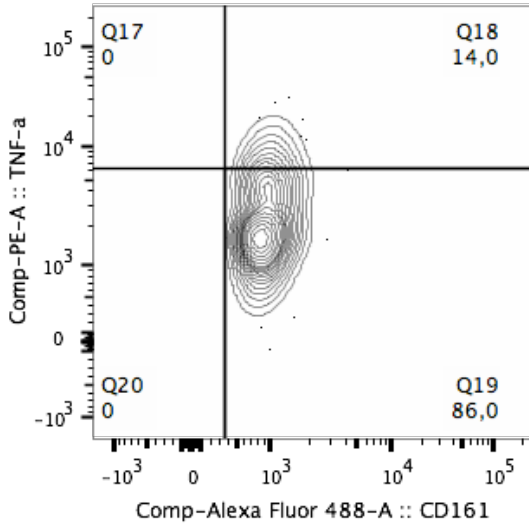

Isotype controls

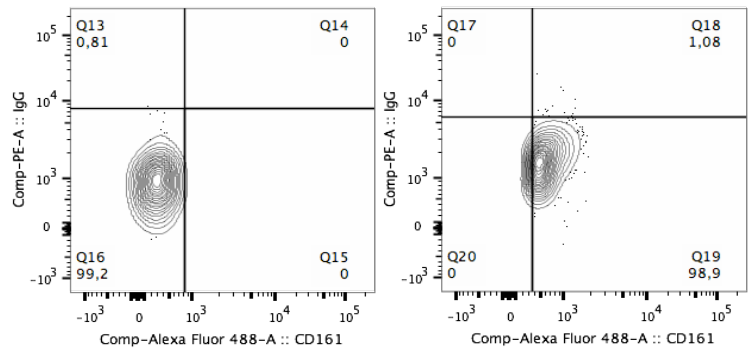

Sample ID: PTCH04

CD3+CD161-IL-17+

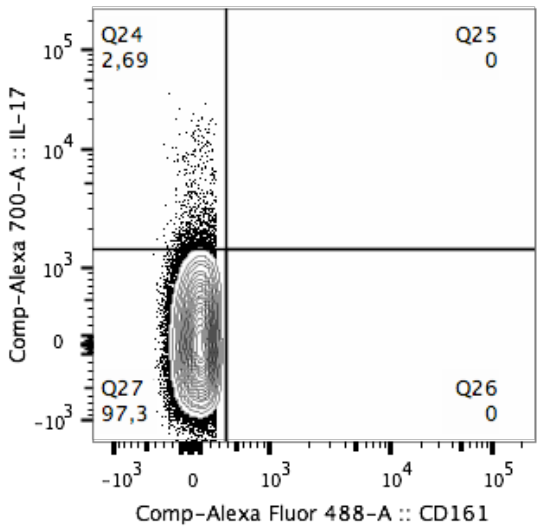

CD3+CD161+IL-17+

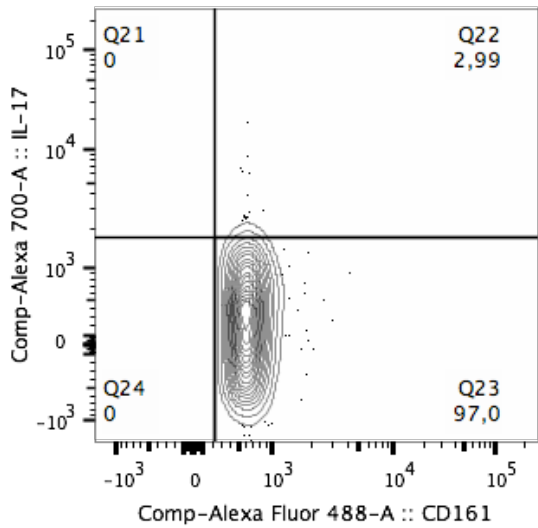

Isotype controls

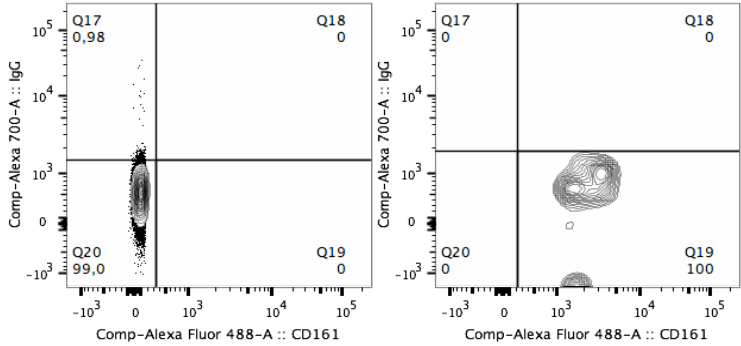

Sample ID: LTCH05

CD3+CD161-IFN $\gamma$ +

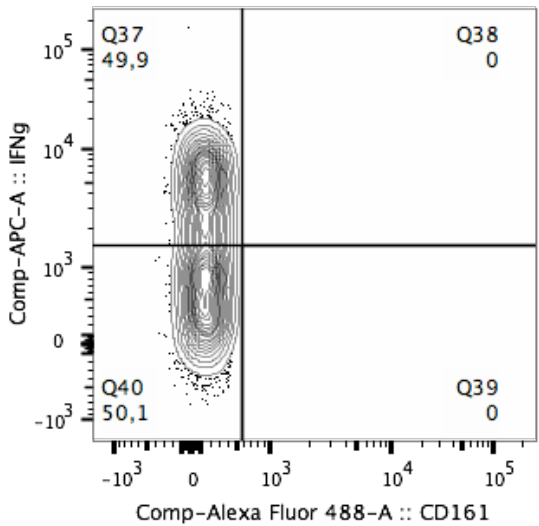

CD3+CD161+IFN $\gamma$ +

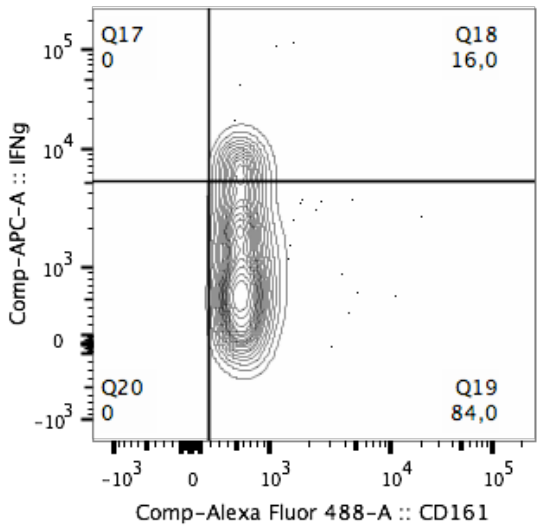

Isotype controls

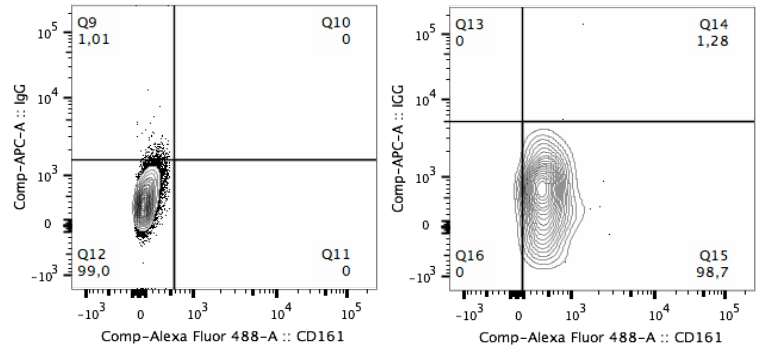

CD3+CD161-TNF $\alpha$ +

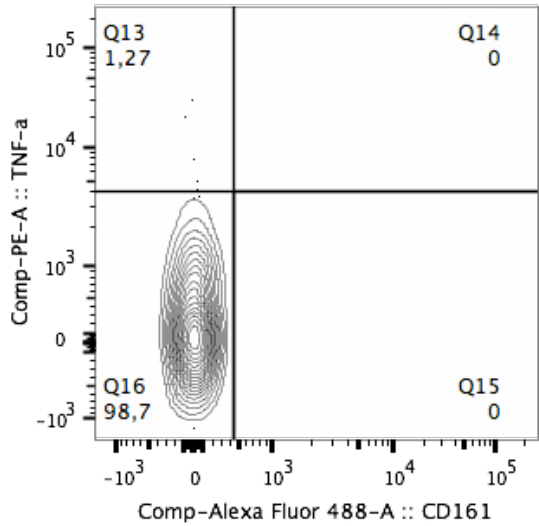

CD3+CD161+TNF $\alpha$ +

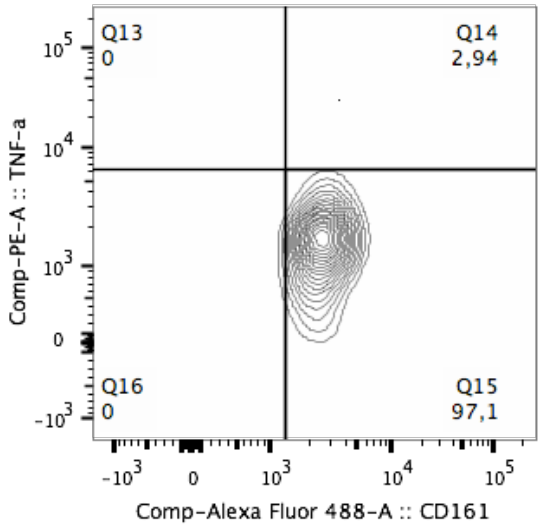

Isotype controls

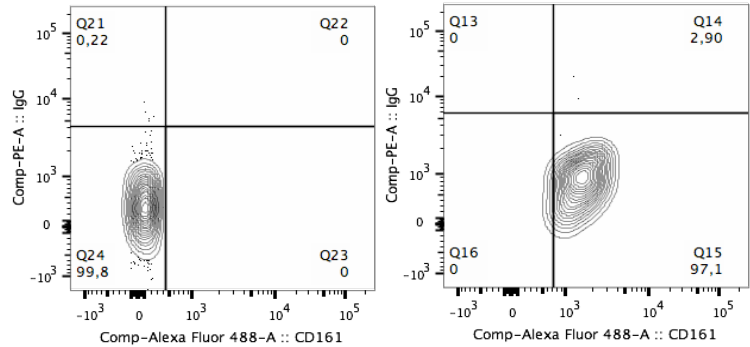

Sample ID: LTCH05

CD3+CD161-IL-17+

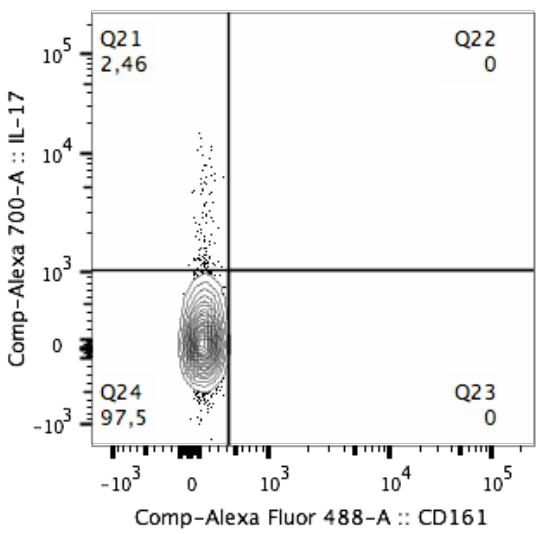

CD3+CD161+IL-17+

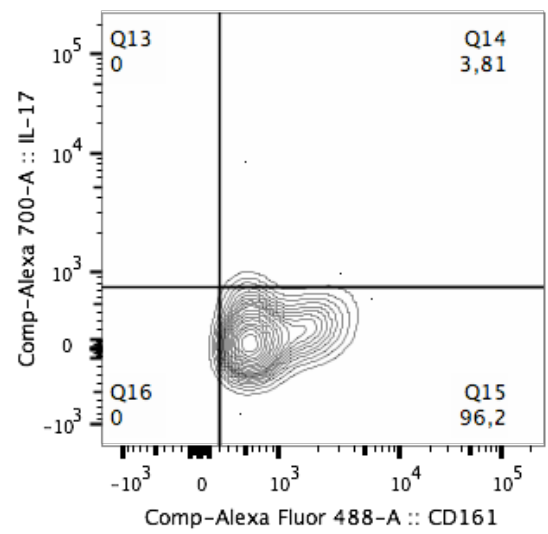

Isotype controls

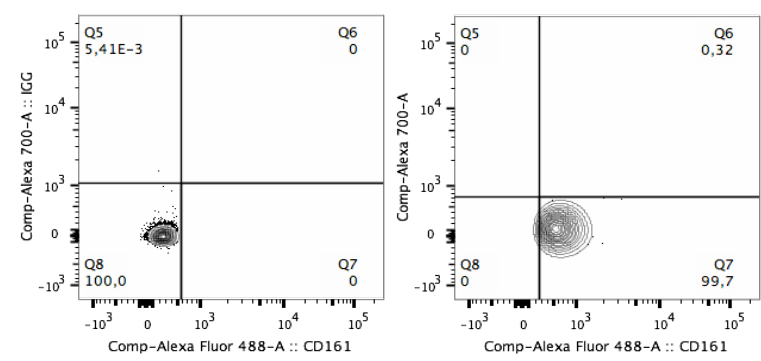

# Sample ID: PTCH05

## CD3+CD161-IFN $\gamma$ +

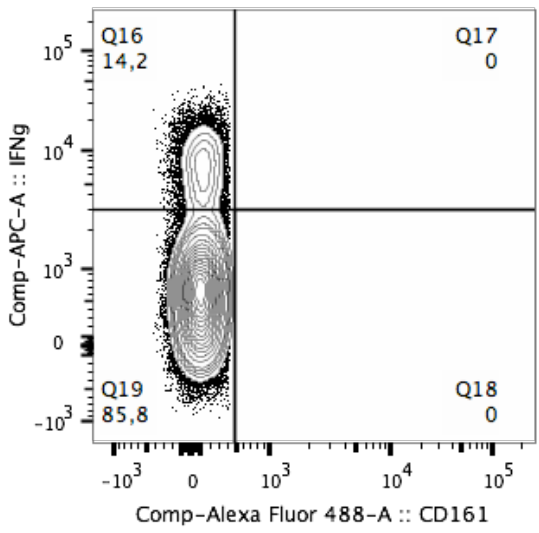

## CD3+CD161+IFN $\gamma$ +

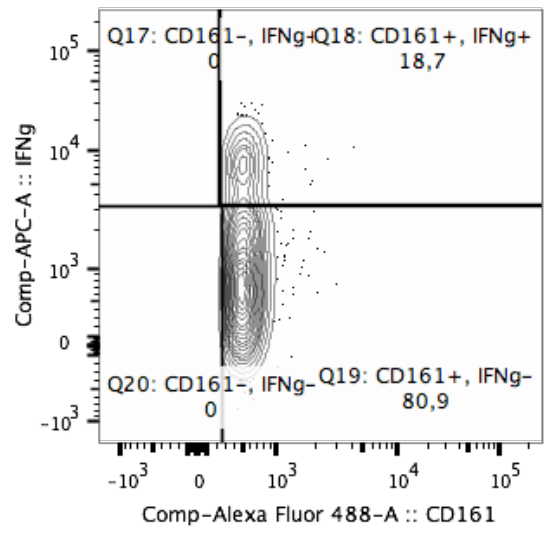

## Isotype controls

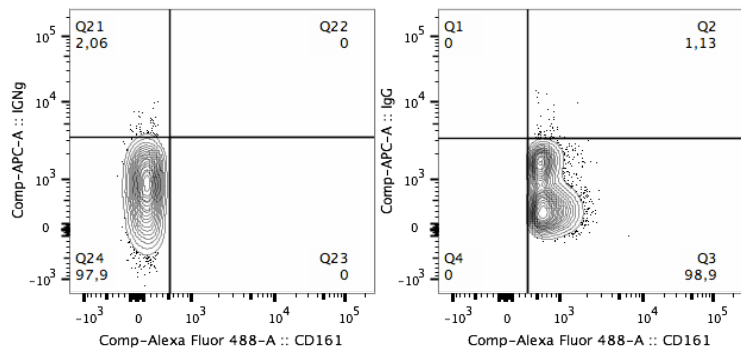

## CD3+CD161-TNF $\alpha$ +

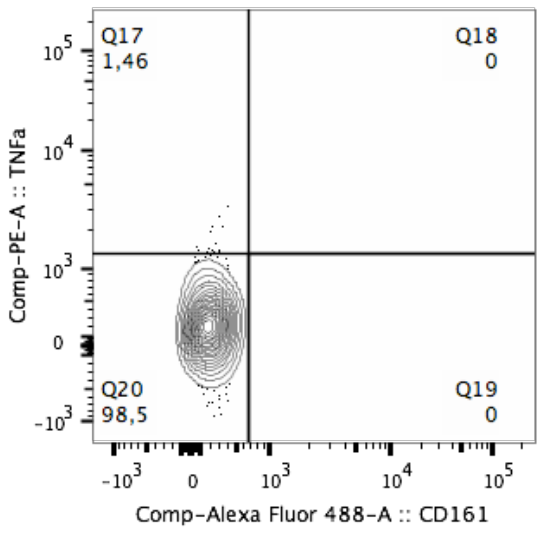

## CD3+CD161+TNF $\alpha$ +

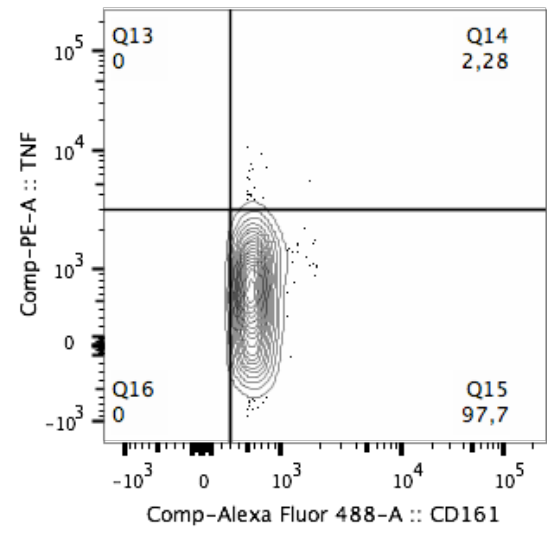

## Isotype controls

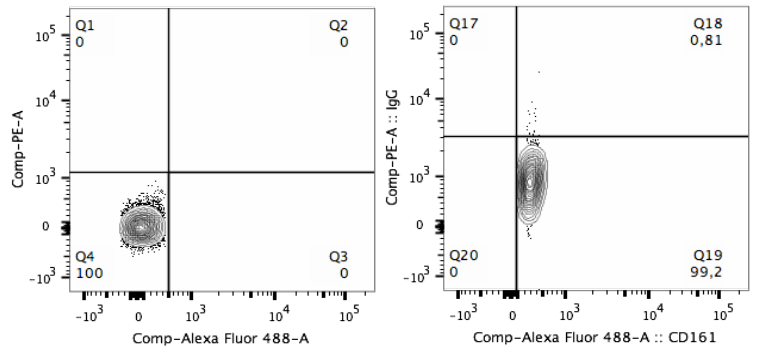



Sample ID: PTCH05

CD3+CD161-IL-17+

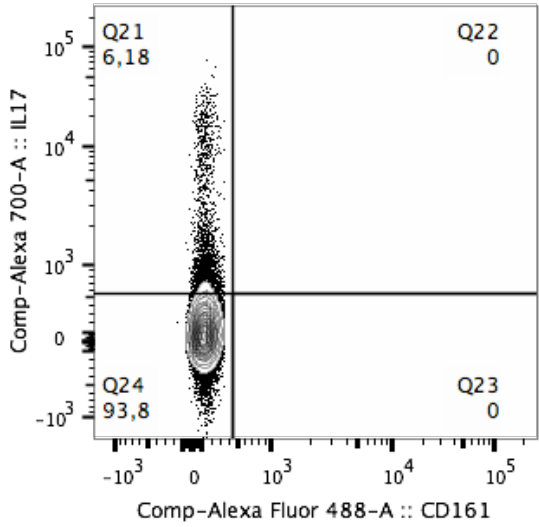

CD3+CD161+IL-17+

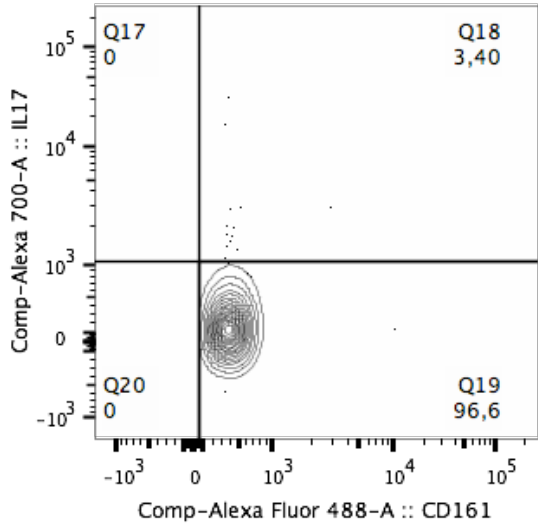

Isotype controls

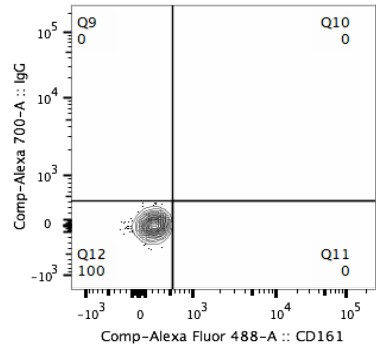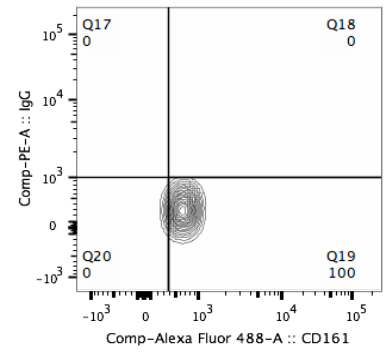

Sample ID: LTCH06

CD3+CD161-IFN $\gamma$ +

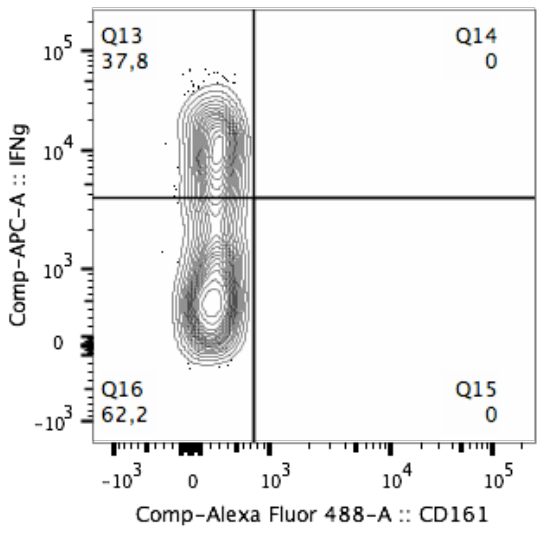

CD3+CD161+IFN $\gamma$ +

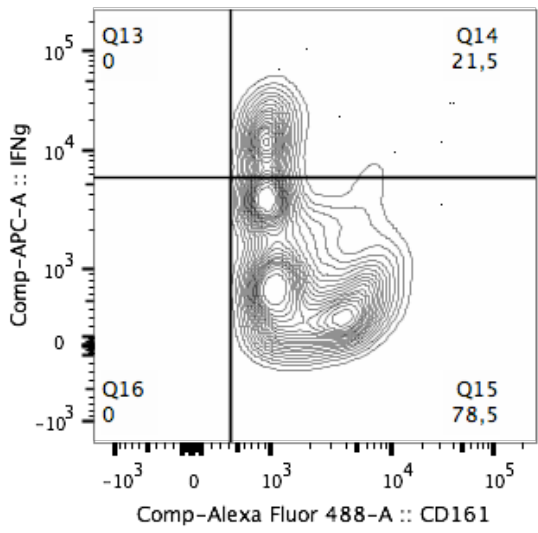

Isotype controls

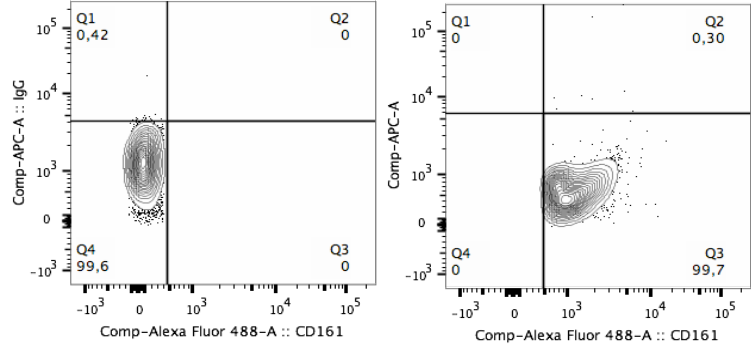

CD3+CD161-TNF $\alpha$ +

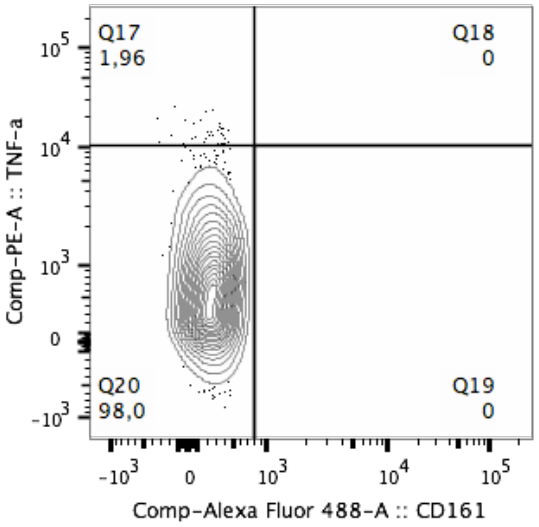

CD3+CD161+TNF $\alpha$ +

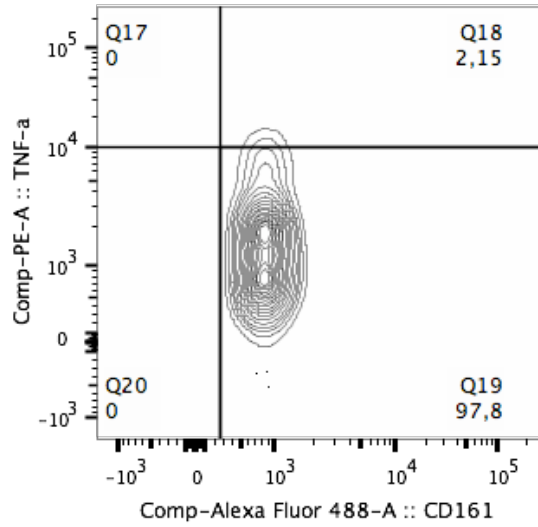

Isotype controls

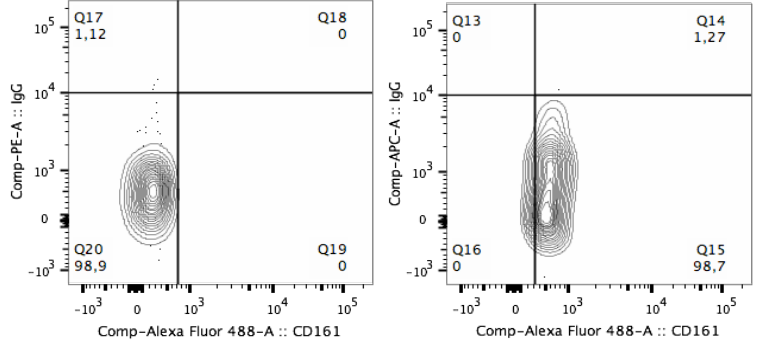

Sample ID: LTCH06

CD3+CD161-IL-17+

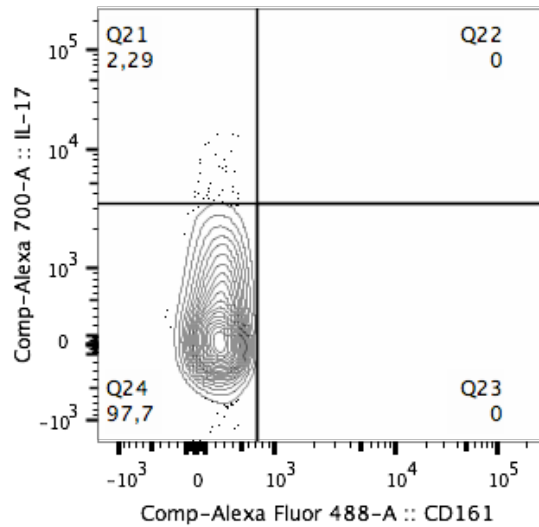

CD3+CD161+IL-17+

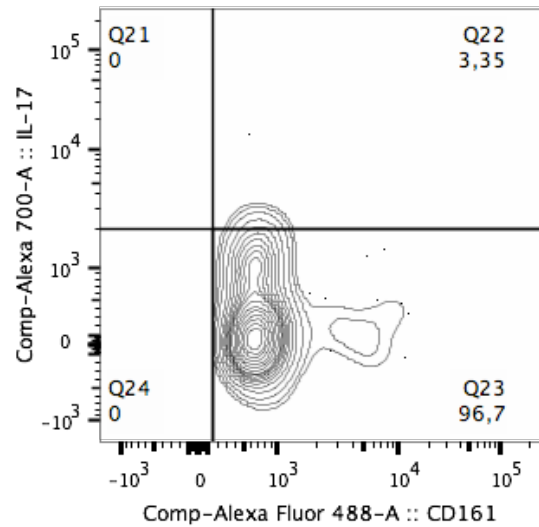

Isotype controls

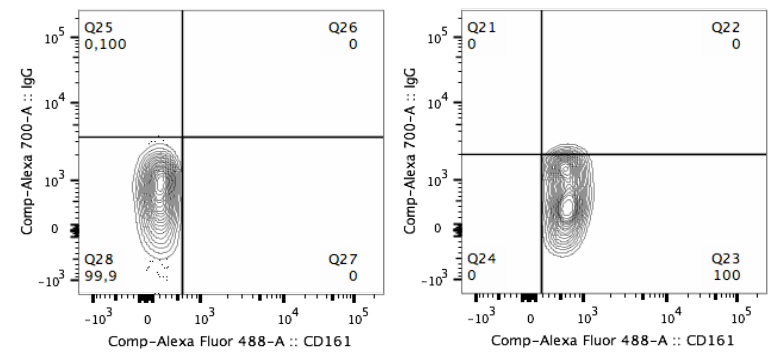

CD3+CD161-IL-4+

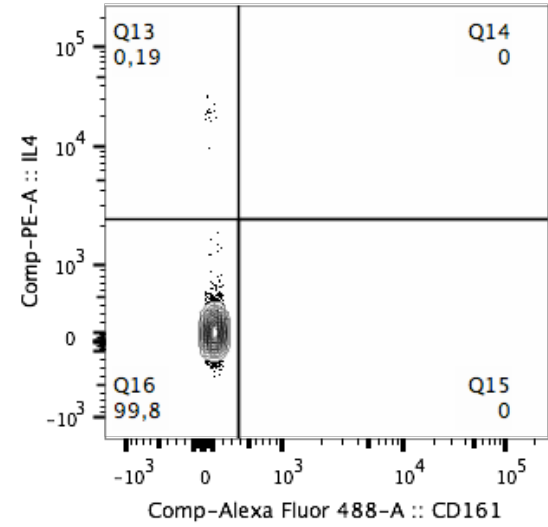

CD3+CD161+IL-4+

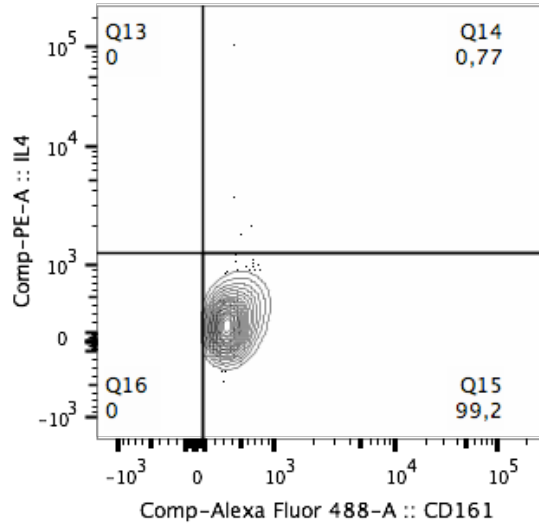

Isotype controls

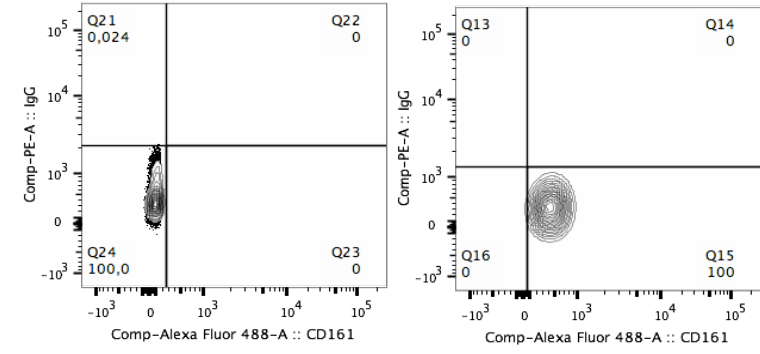

# Sample ID: PTCH06

## CD3+CD161-IFN $\gamma$ +

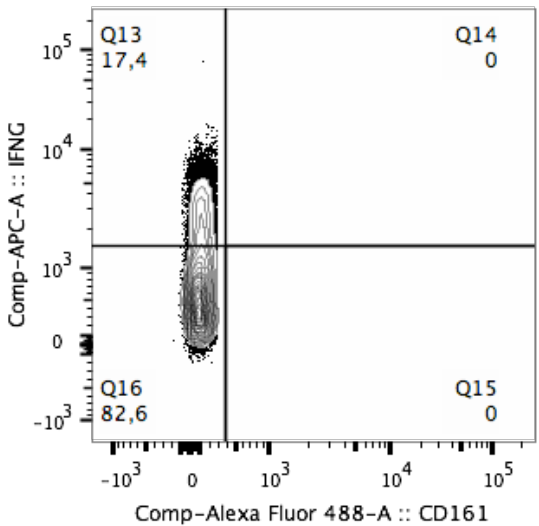

## CD3+CD161+IFN $\gamma$ +

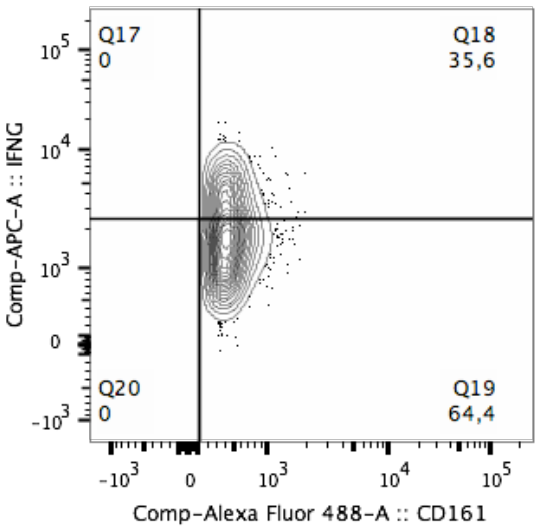

## Isotype controls

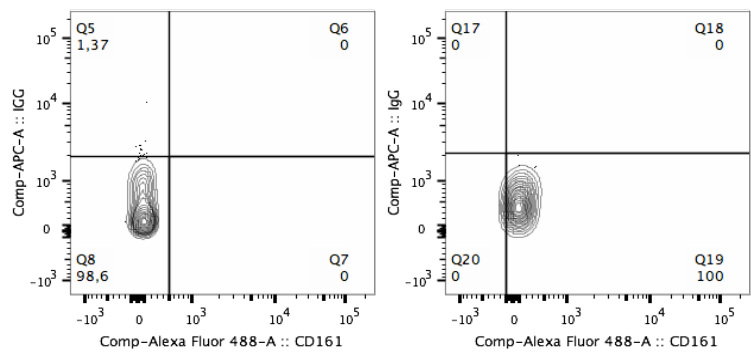

## CD3+CD161-TNF $\alpha$ +

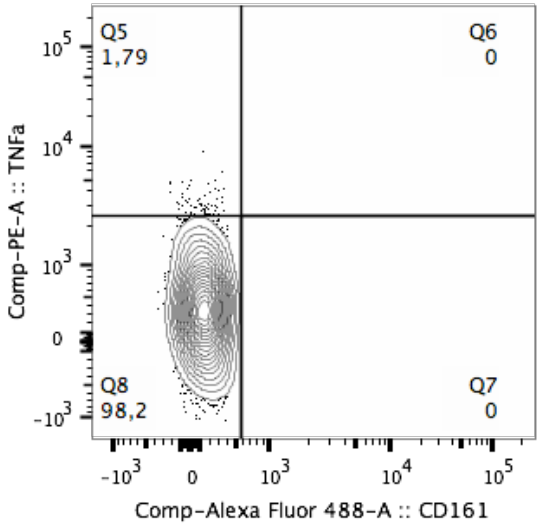

## CD3+CD161+TNF $\alpha$ +

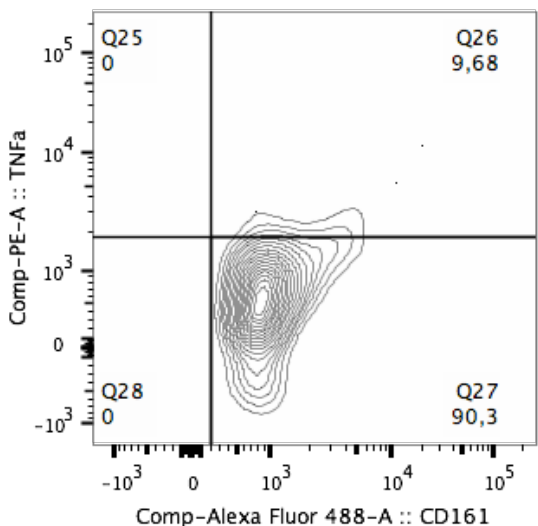

## Isotype controls

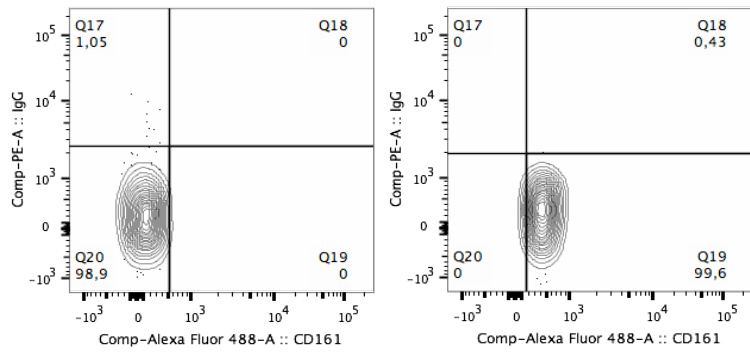

# Sample ID: PTCH06

## CD3+CD161-IL-17+

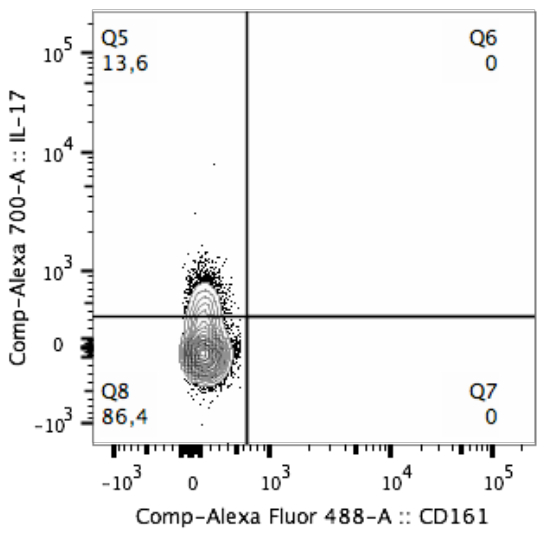

## CD3+CD161+IL-17+

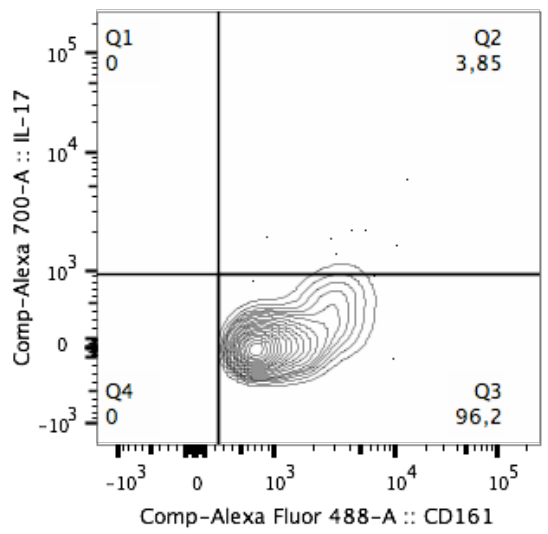

## Isotype controls

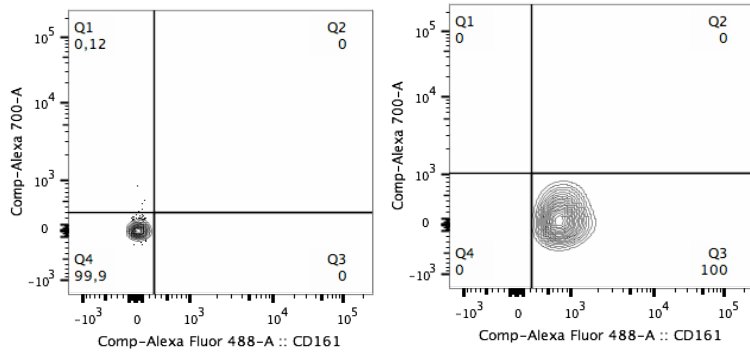

## CD3+CD161-IL-4+

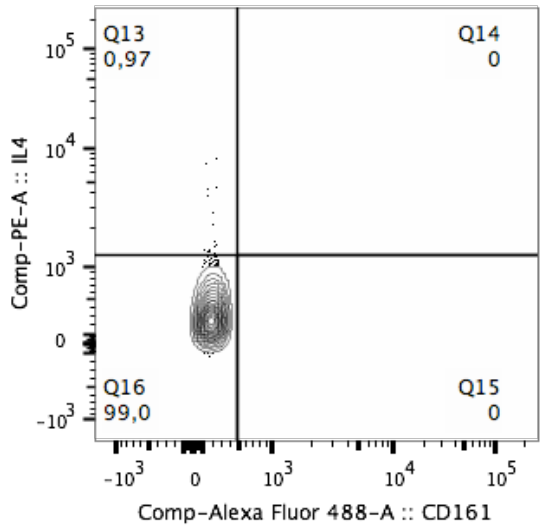

## CD3+CD161+IL-4+

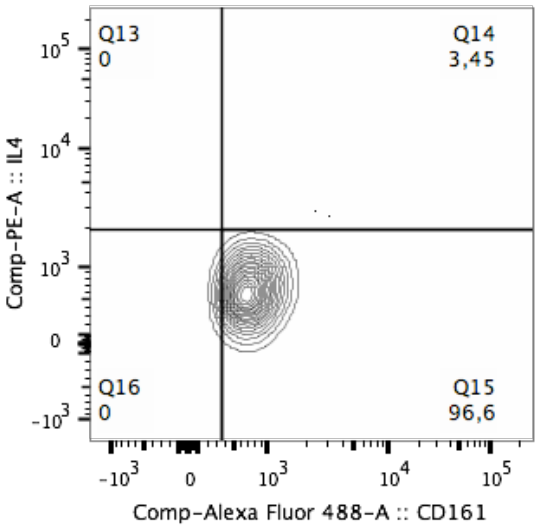

## Isotype controls

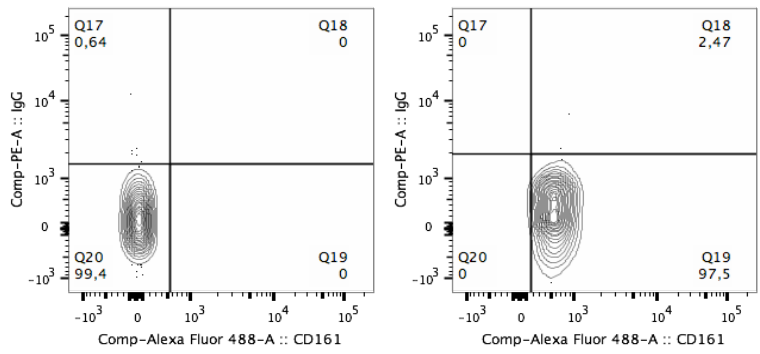

Sample ID: LTCH07

CD3+CD161-IFN $\gamma$ +

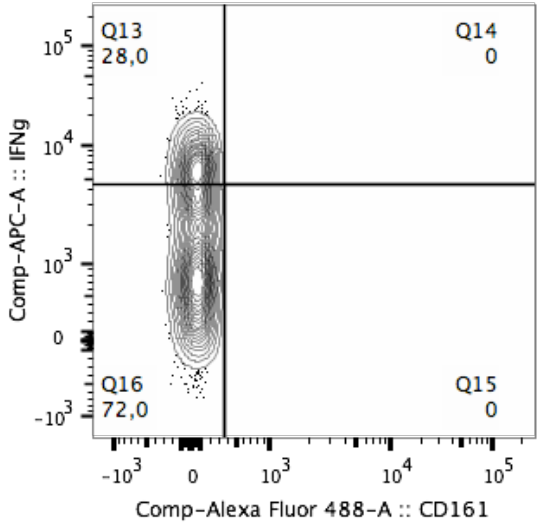

CD3+CD161+IFN $\gamma$ +

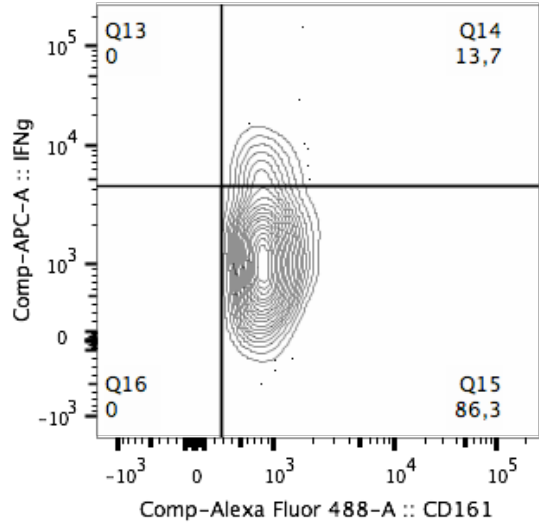

Isotype controls

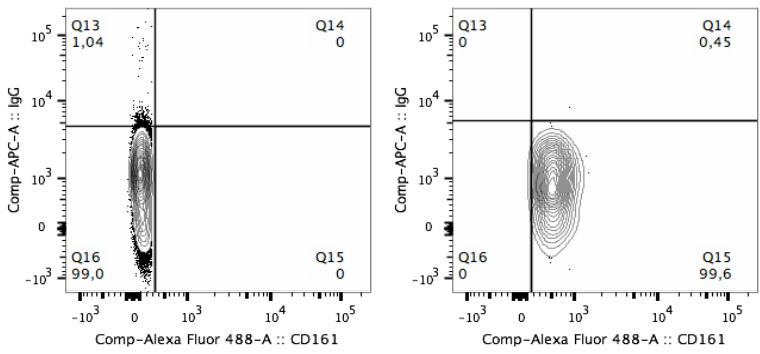

CD3+CD161-TNF $\alpha$ +

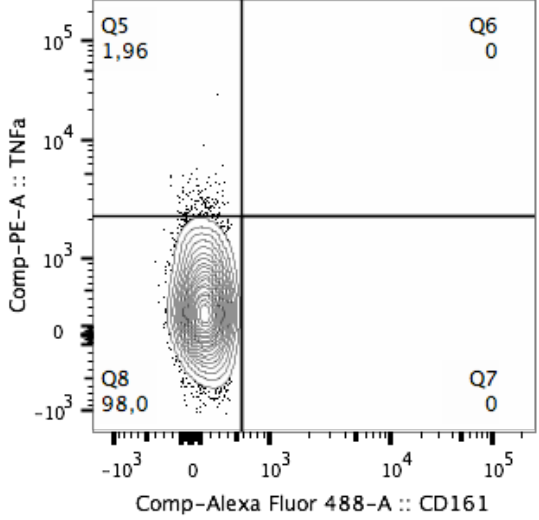

CD3+CD161+TNF $\alpha$ +

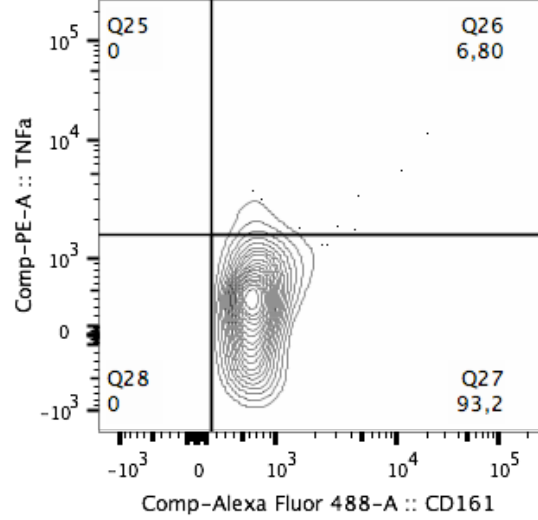

Isotype controls

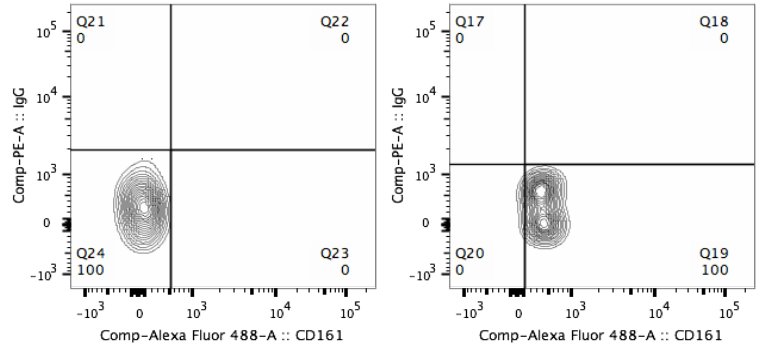

Sample ID: LTCH07

### CD3+CD161-IL-17+

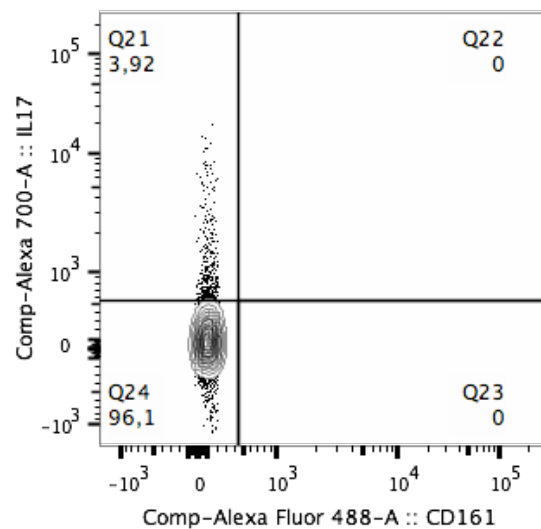

### CD3+CD161+IL-17+

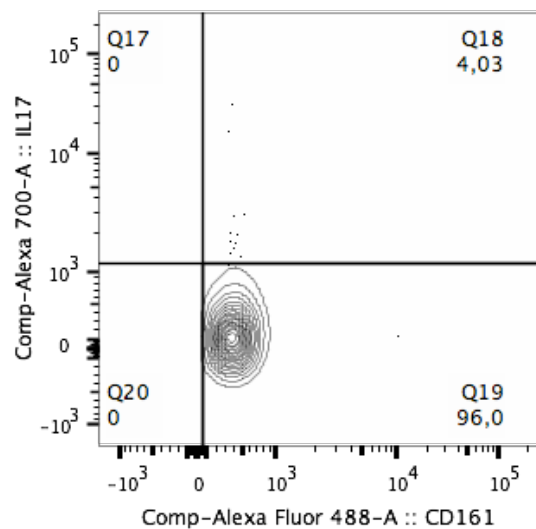

### Isotype controls

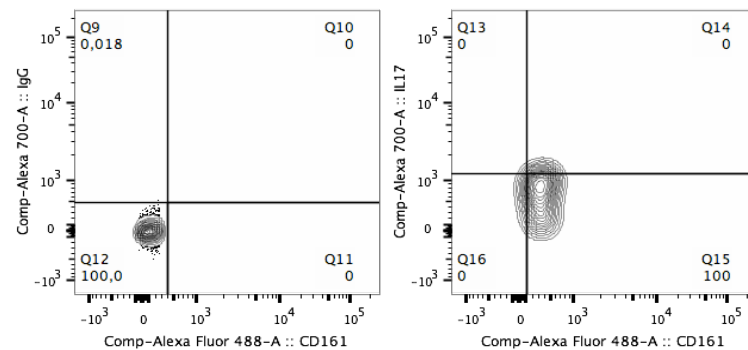

### CD3+CD161-IL-4+

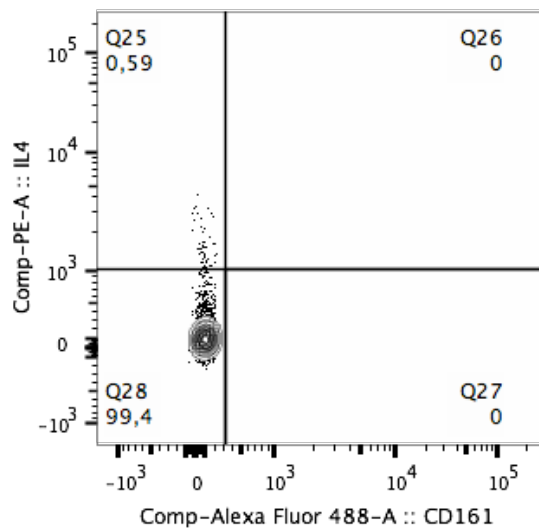

### CD3+CD161+IL-4+

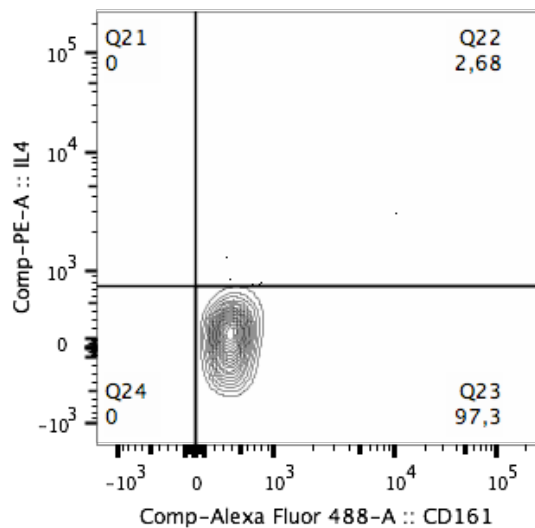

### Isotype controls

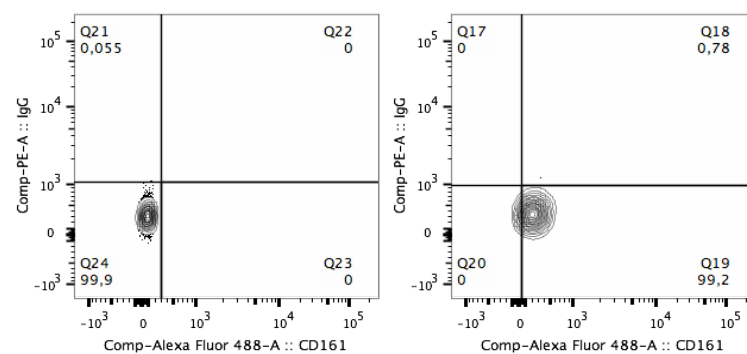

Sample ID: PTCH07

CD3+CD161-IFN $\gamma$ +

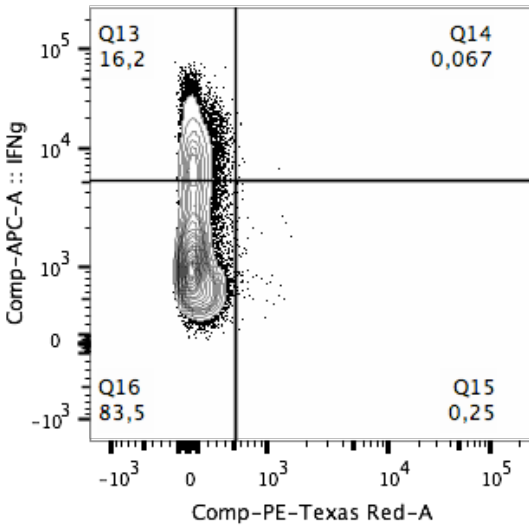

CD3+CD161+IFN $\gamma$ +

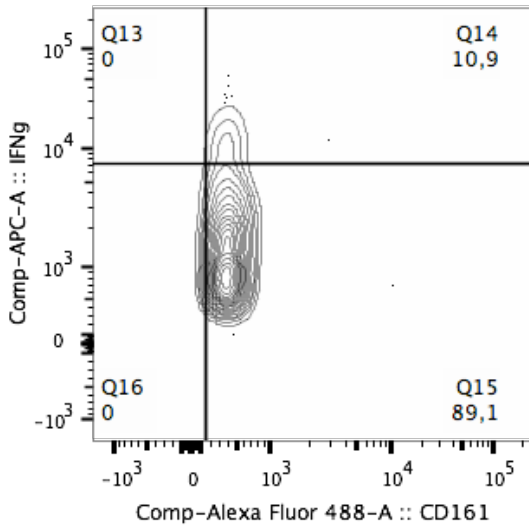

Isotype controls

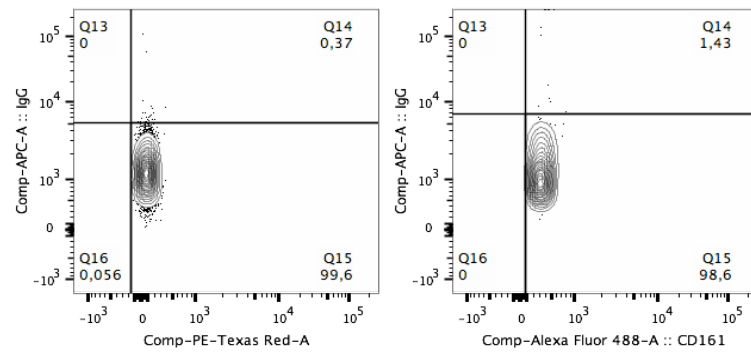

CD3+CD161-TNF $\alpha$ +

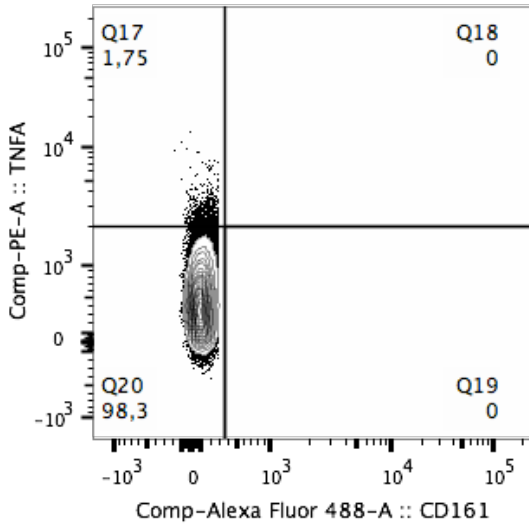

CD3+CD161+TNF $\alpha$ +

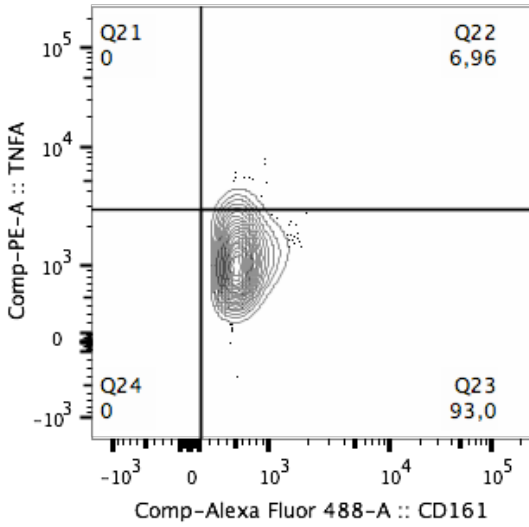

Isotype controls

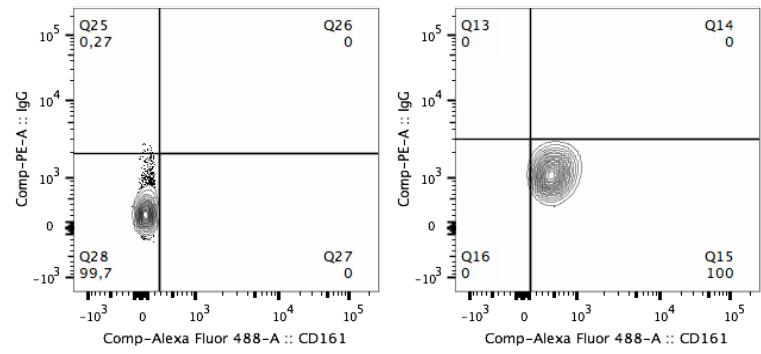



Sample ID: PTCH07

CD3+CD161-IL-17+

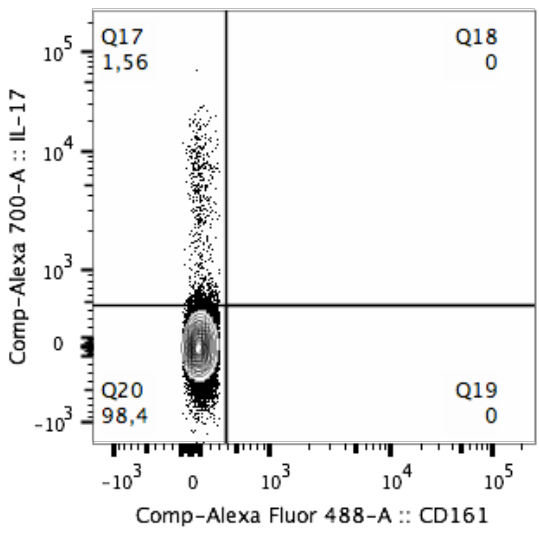

CD3+CD161+IL-17+

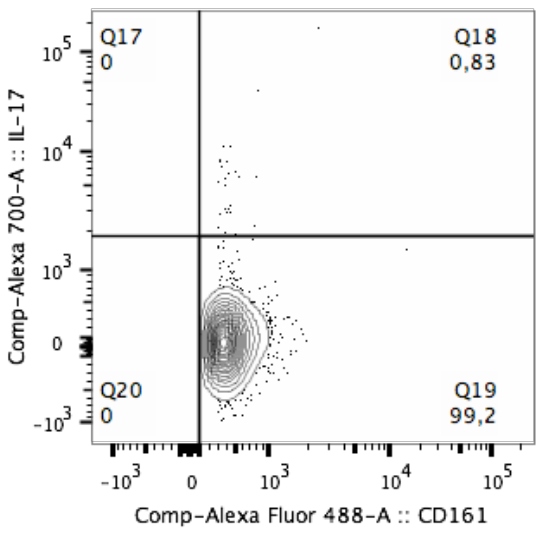

Isotype controls

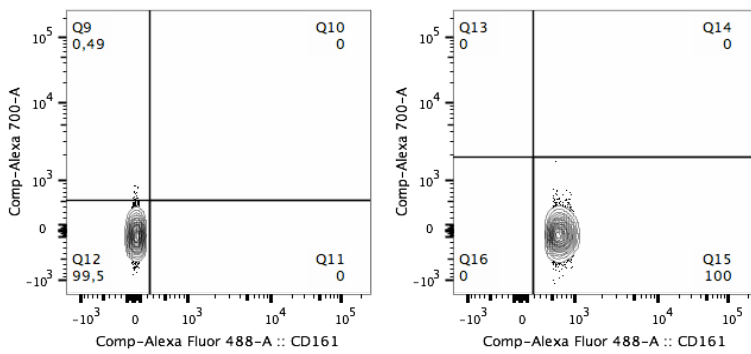

CD3+CD161-IL-4+

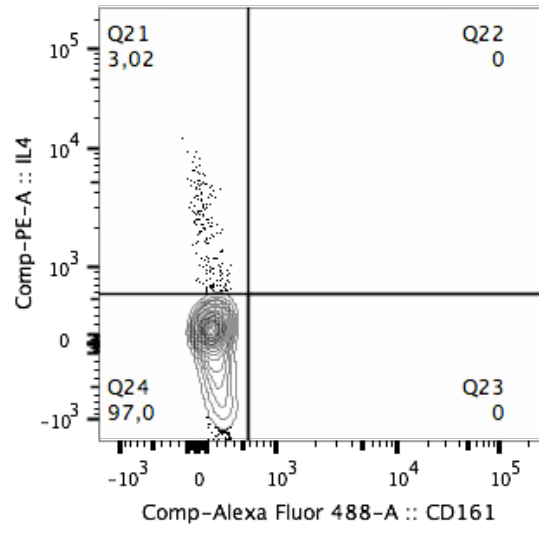

CD3+CD161+IL-4+

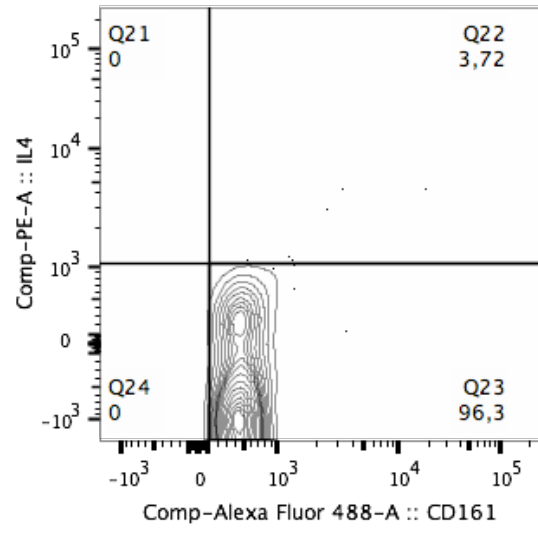

Isotype controls

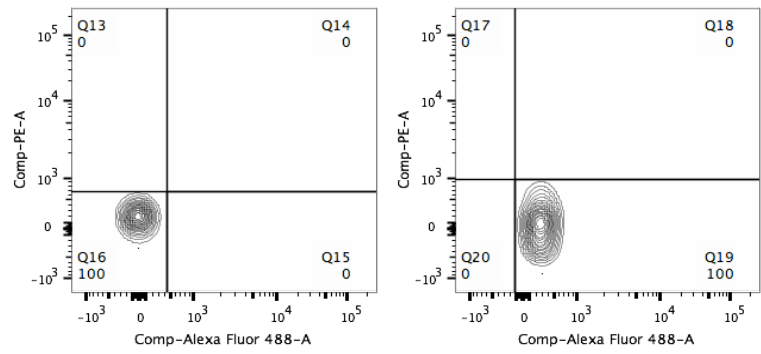

# Sample ID: LTCH08

## CD3+CD161-IFN $\gamma$ +

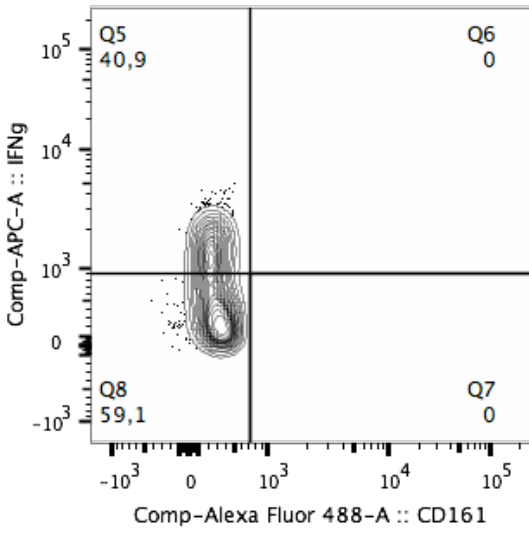

## CD3+CD161+IFN $\gamma$ +

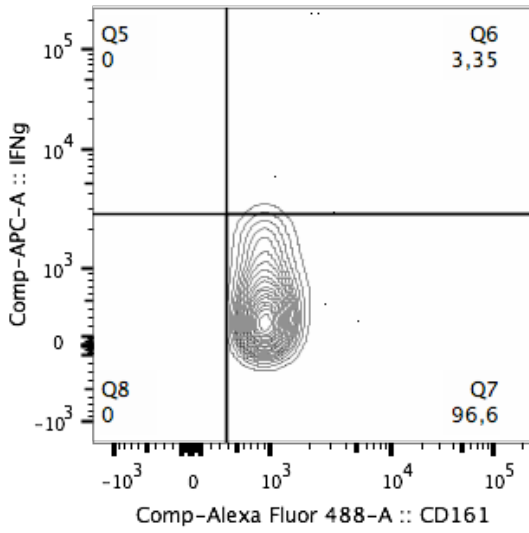

## Isotype controls

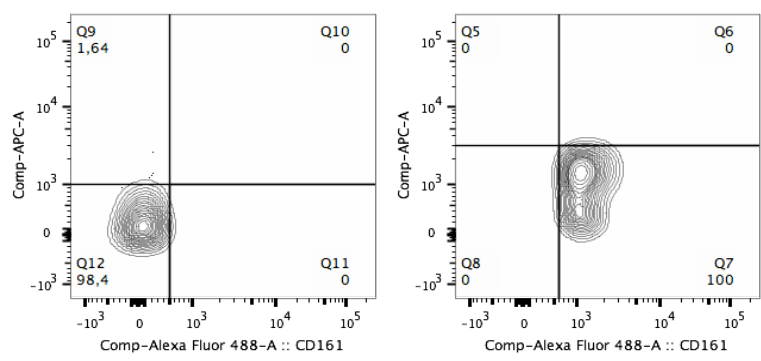

## CD3+CD161-TNF $\alpha$ +

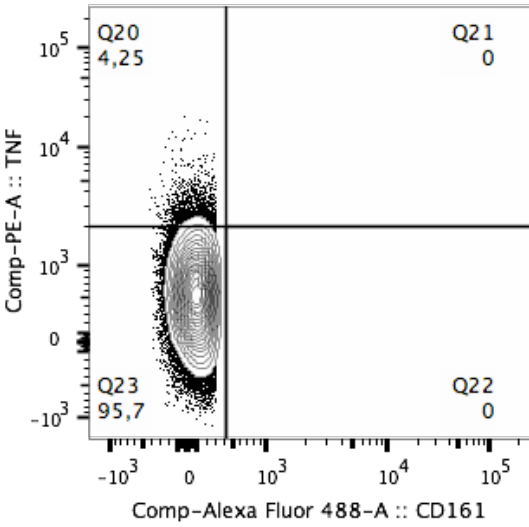

## CD3+CD161+TNF $\alpha$ +

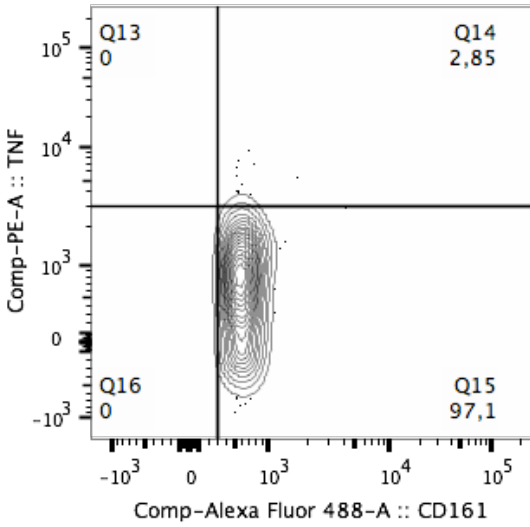

## Isotype controls

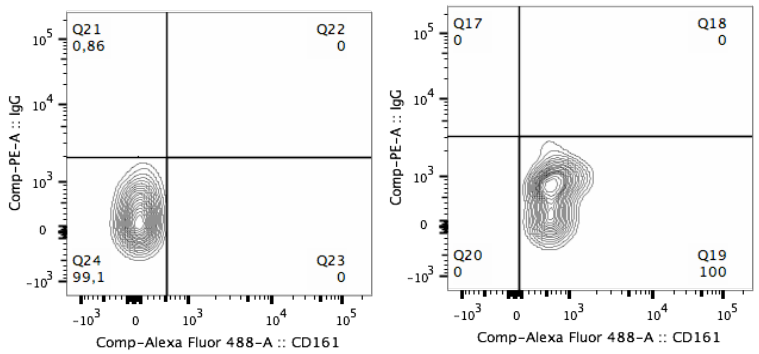

# Sample ID: LTCH08

## CD3+CD161-IL-17+

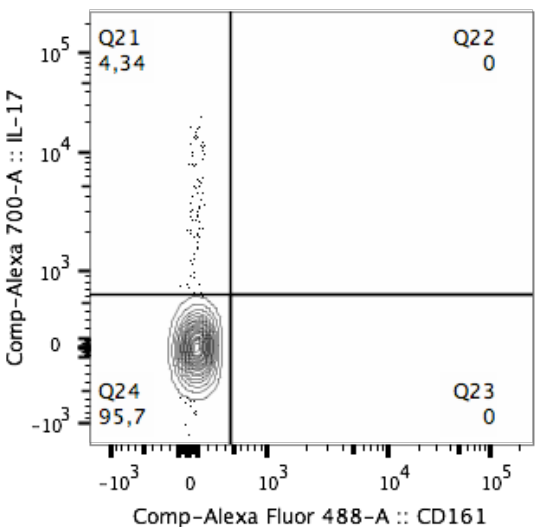

## CD3+CD161+IL-17+

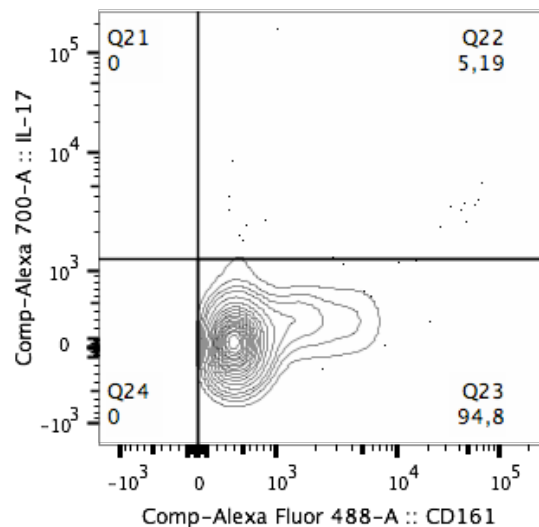

## Isotype controls

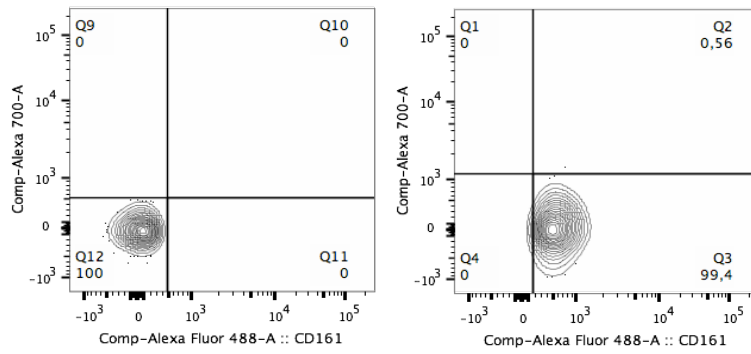

## CD3+CD161-IL-4+

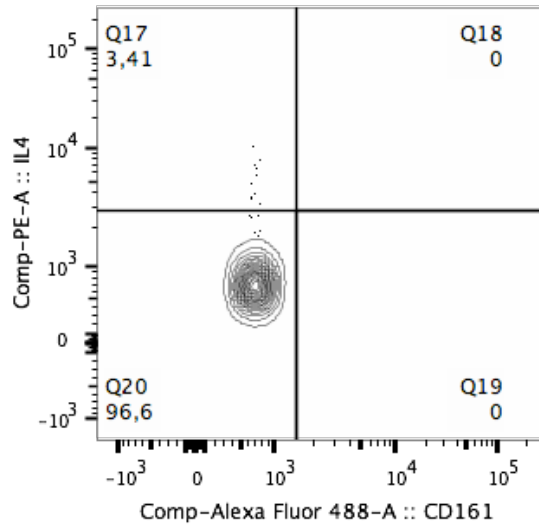

## CD3+CD161+IL-4+

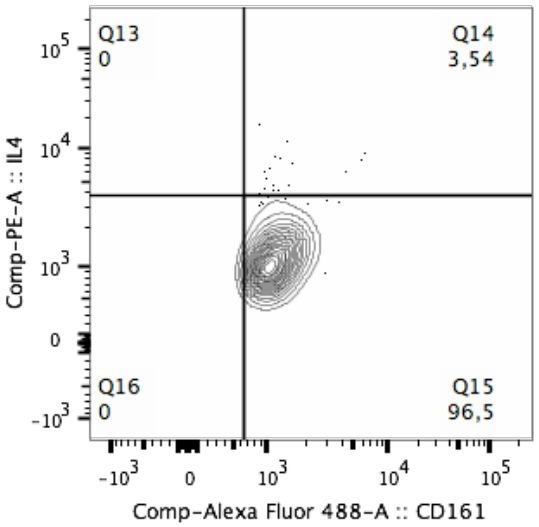

## Isotype controls

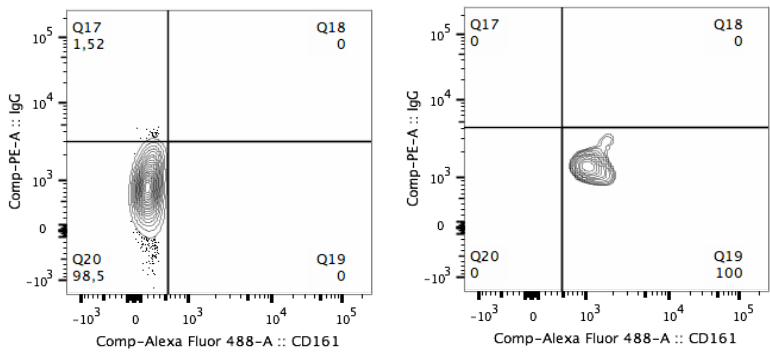

# Sample ID: PTCH08

## CD3+CD161-IFN $\gamma$ +

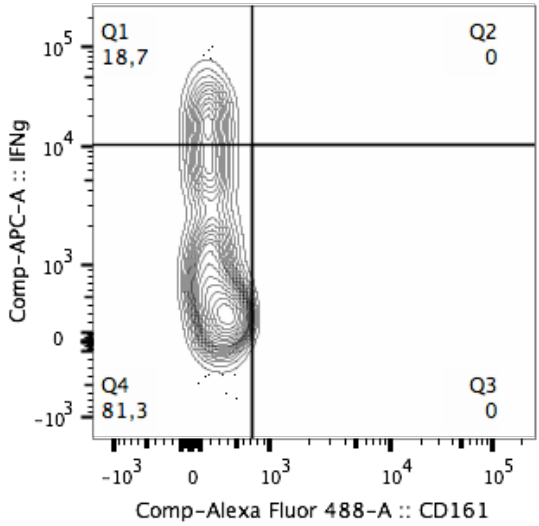

## CD3+CD161+IFN $\gamma$ +

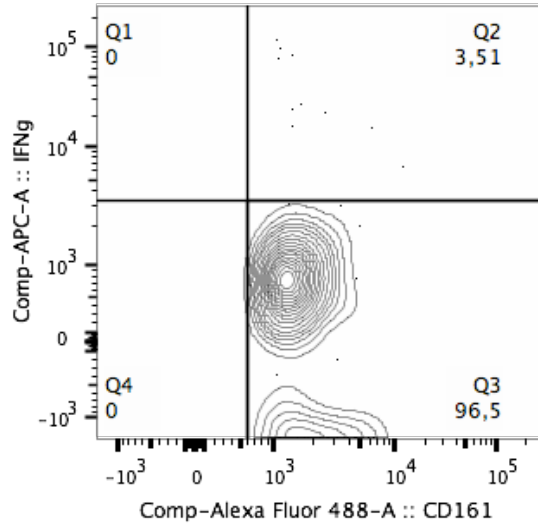

## Isotype controls

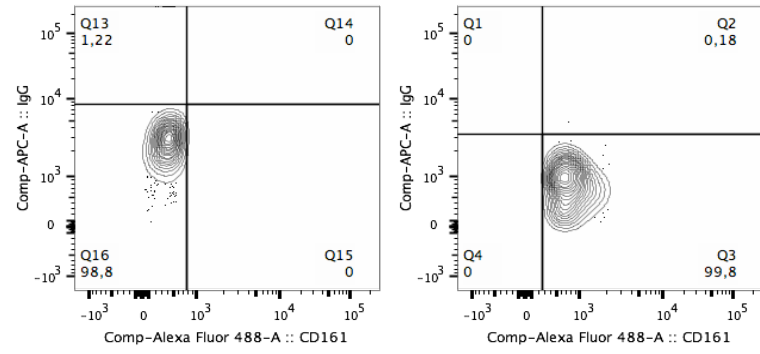

## CD3+CD161-TNF $\alpha$ +

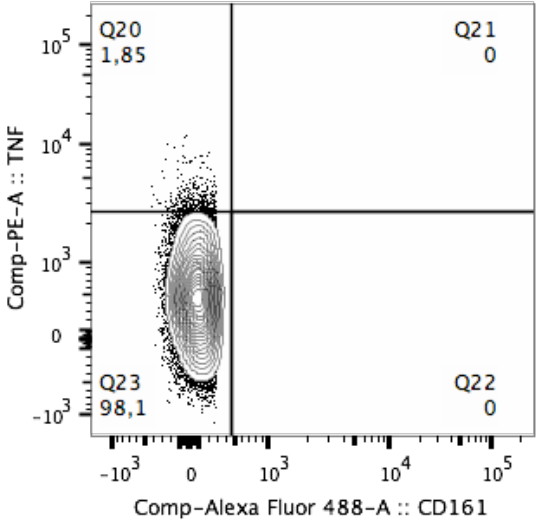

## CD3+CD161+TNF $\alpha$ +

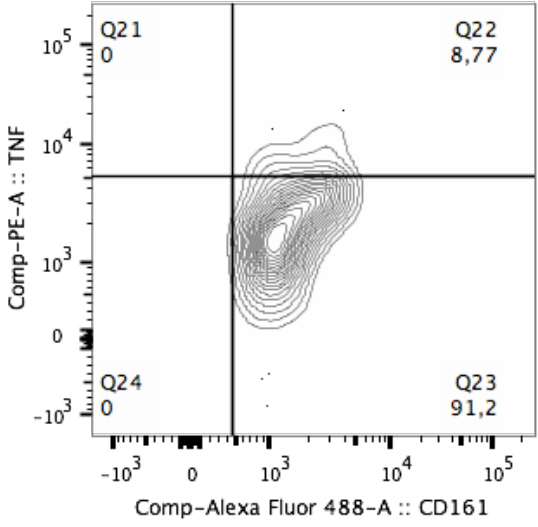

## Isotype controls

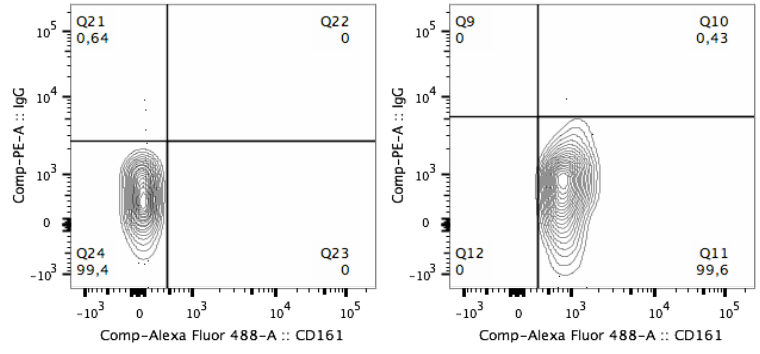

Sample ID: PTCH08

CD3+CD161-IL-17+

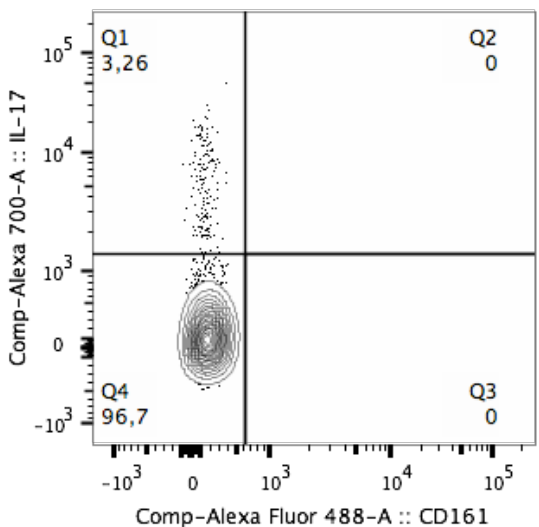

CD3+CD161+IL-17+

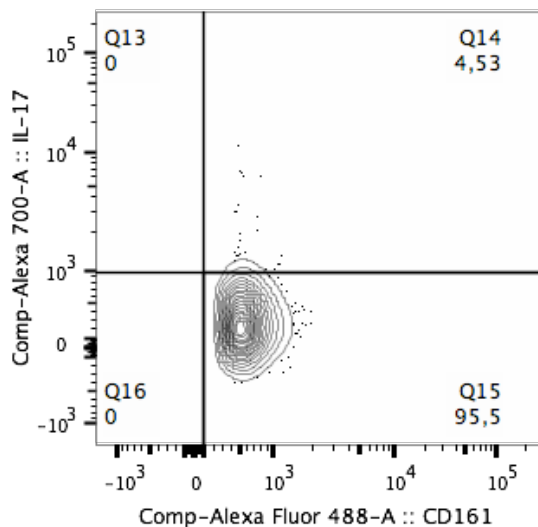

Isotype controls

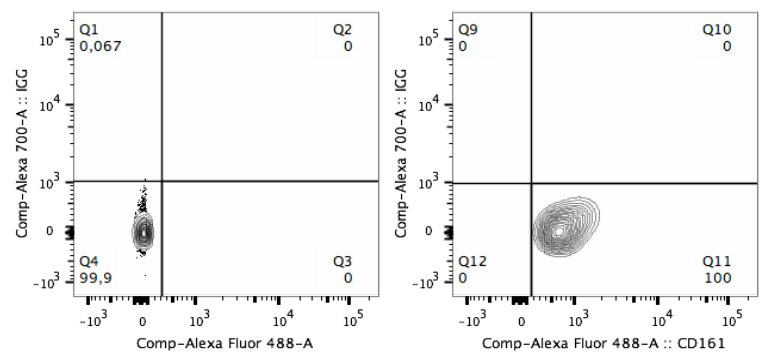

CD3+CD161-IL-4+

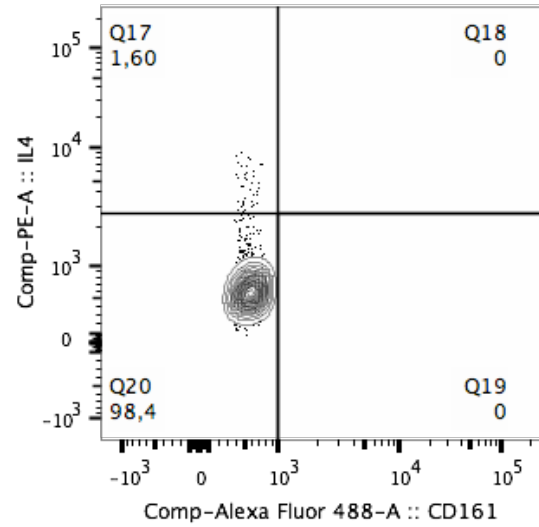

CD3+CD161+IL-4+

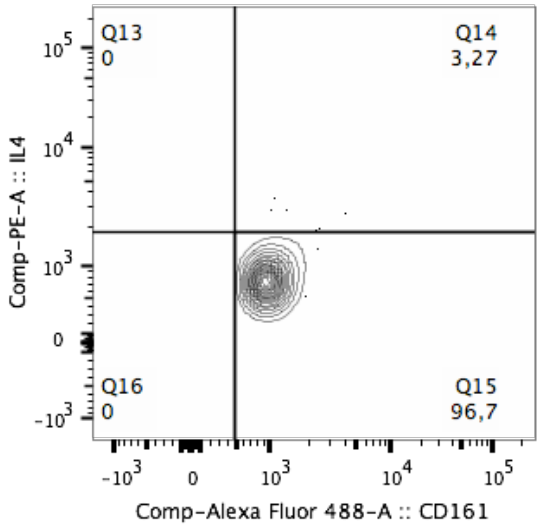

Isotype controls

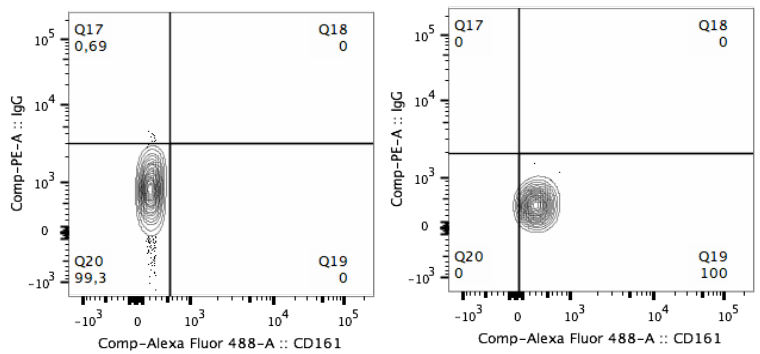

Sample ID: LTCH09

CD3+CD161-IFN $\gamma$ +

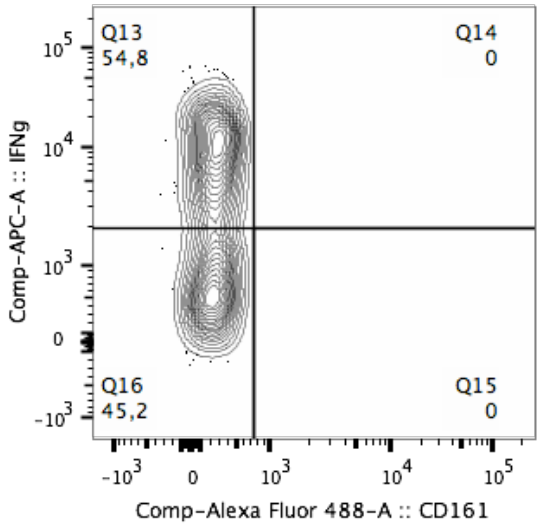

CD3+CD161+IFN $\gamma$ +

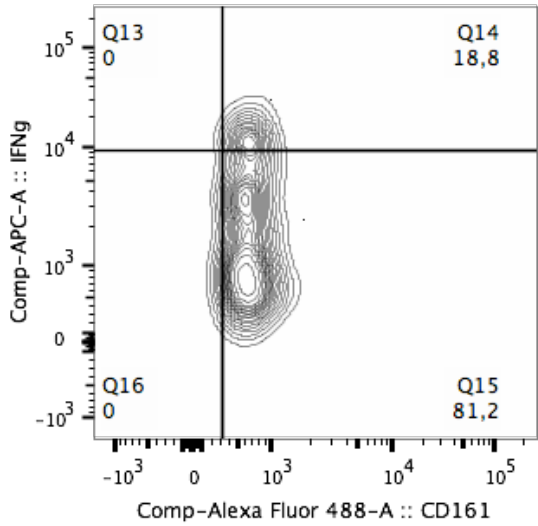

Isotype controls

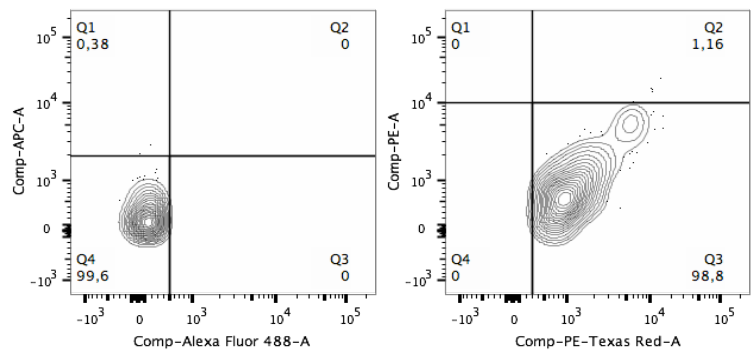

CD3+CD161-TNF $\alpha$ +

CD3+CD161+TNF $\alpha$ +

Isotype controls

Not done

Sample ID: LTCH09

CD3+CD161-IL-17+

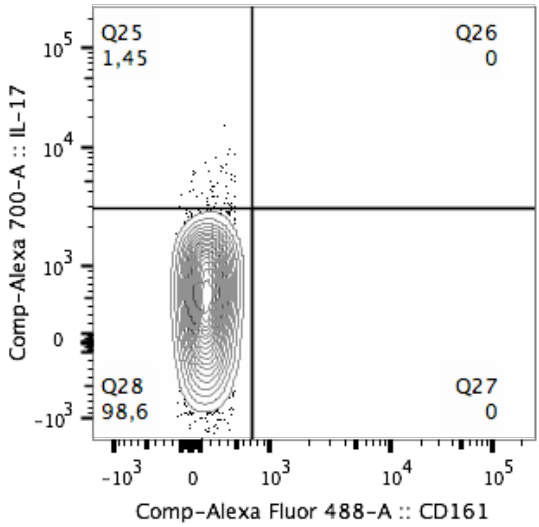

CD3+CD161+IL-17+

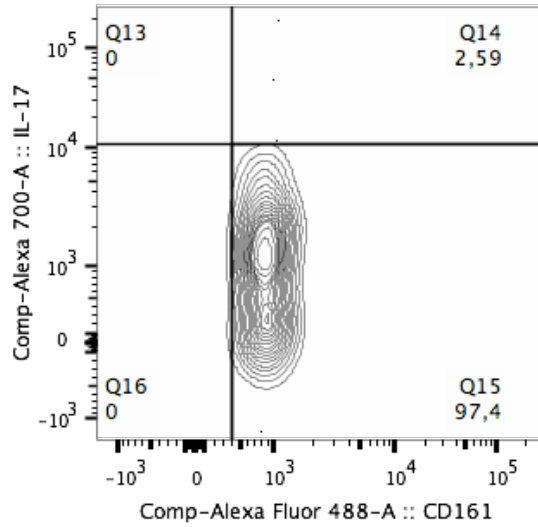

Isotype controls

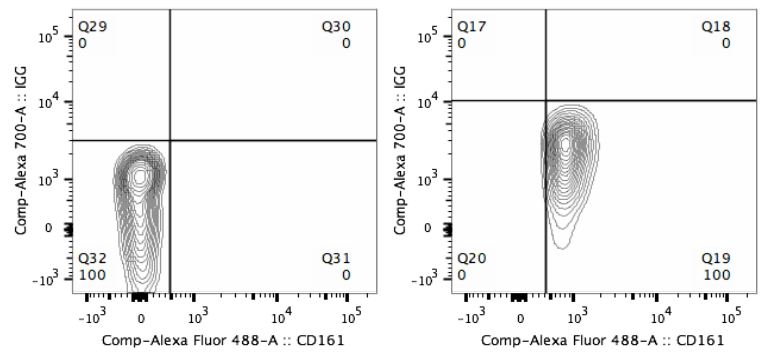

CD3+CD161-IL-4+

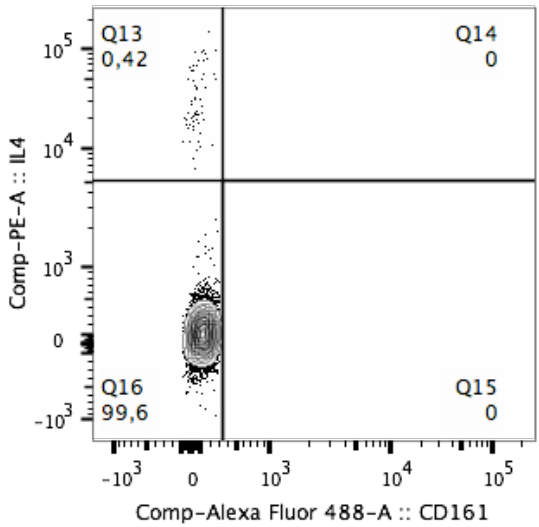

CD3+CD161+IL-4+

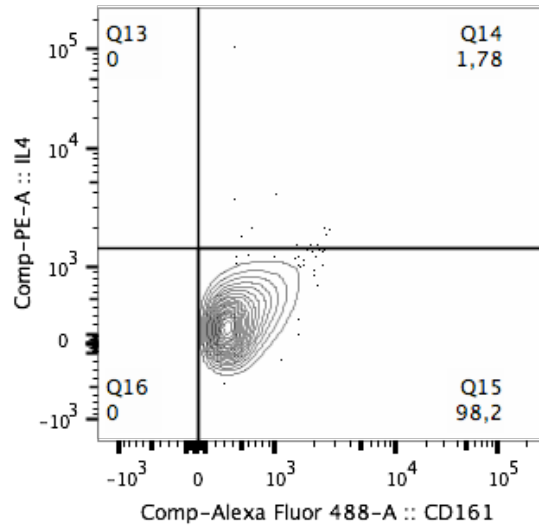

Isotype controls

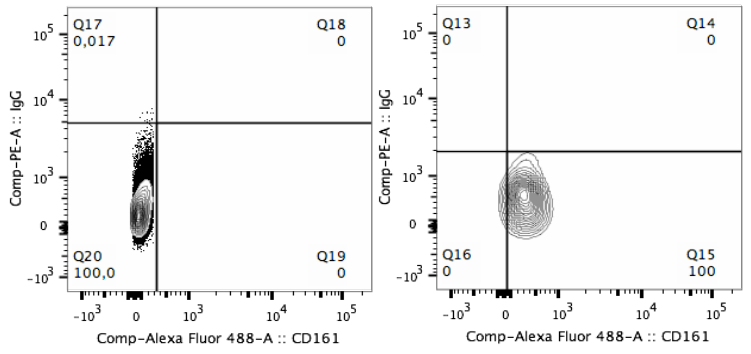

Sample ID: PTCH09

CD3+CD161-IFN $\gamma$ +

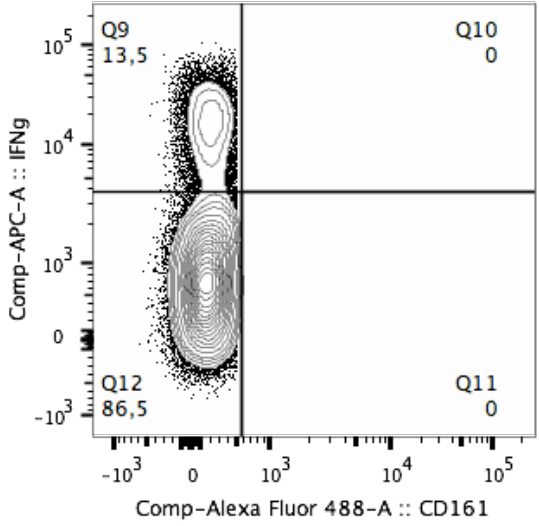

CD3+CD161+IFN $\gamma$ +

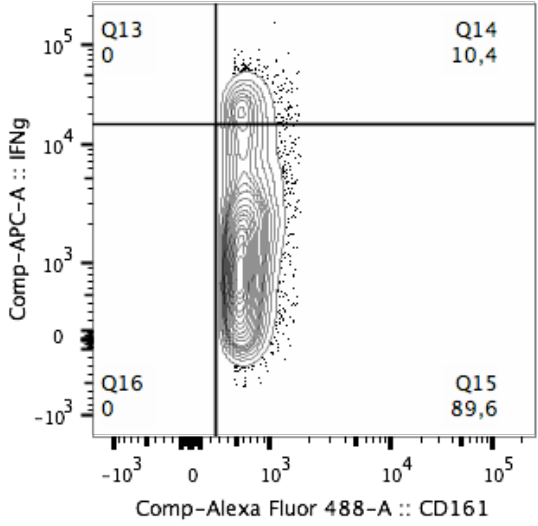

Isotype controls

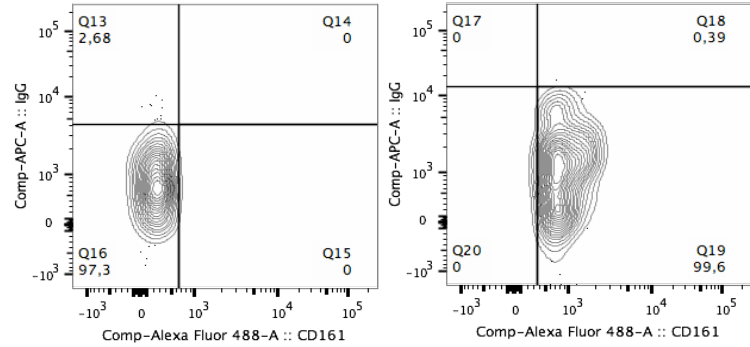

CD3+CD161-TNF $\alpha$ +

CD3+CD161+TNF $\alpha$ +

Isotype controls

Not done



Sample ID: PTCH09

CD3+CD161-IL-17+

CD3+CD161+IL-17+

Isotype controls

Not done

CD3+CD161-IL-4+

CD3+CD161+IL-4+

Isotype controls

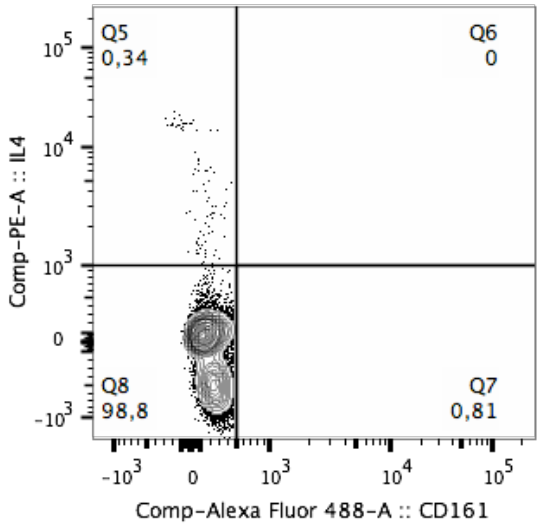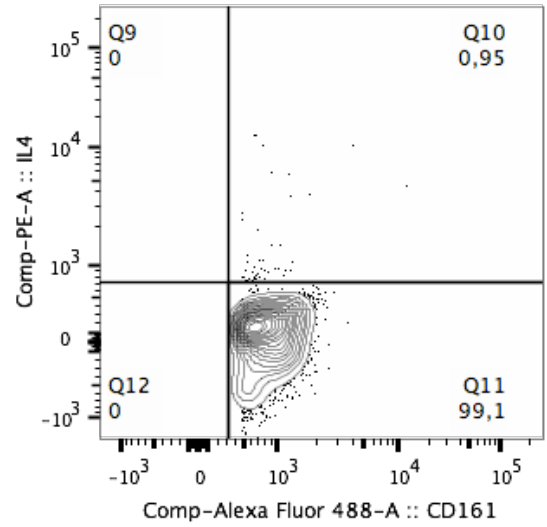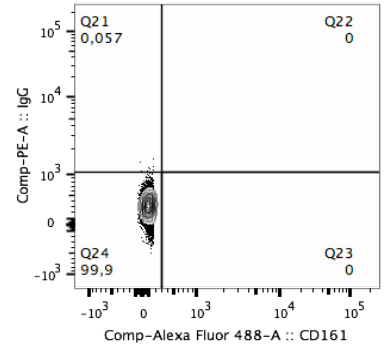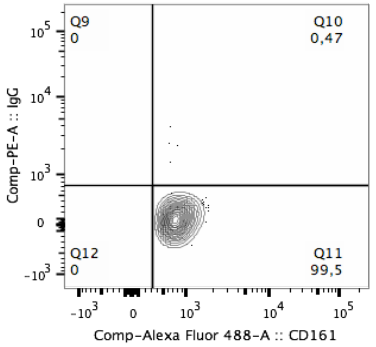

Sample ID: LTCH10

CD3+CD161-IFN $\gamma$ +

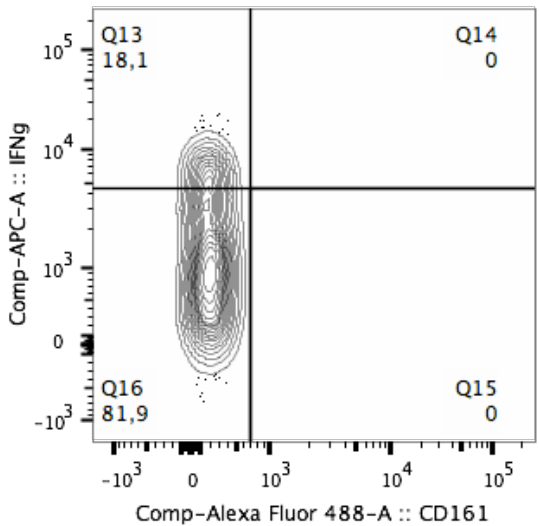

CD3+CD161+IFN $\gamma$ +

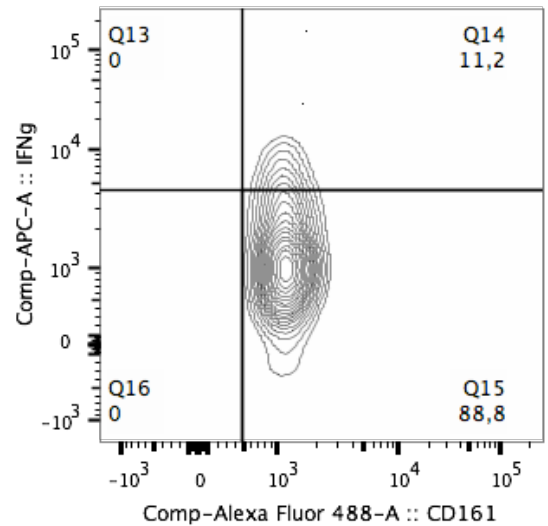

Isotype controls

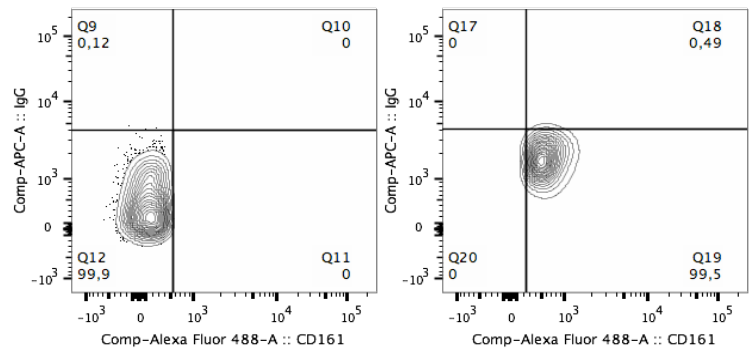

CD3+CD161-TNF $\alpha$ +

CD3+CD161+TNF $\alpha$ +

Isotype controls

Not done

6.-Individual polyfunctional CD3+CD161+ cells.

Sample ID: LTCH06

CD3+CD161-IFN $\gamma$ + / TNF $\alpha$ +

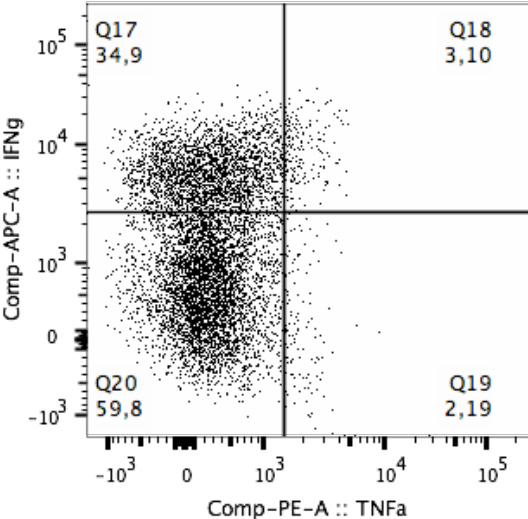

CD3+CD161+IFN $\gamma$ + / TNF $\alpha$ +

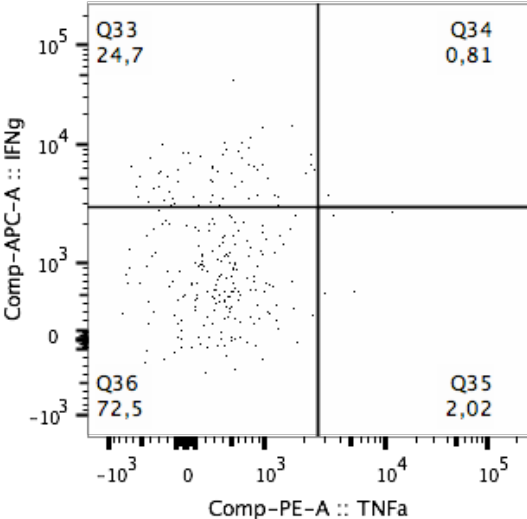

Isotype controls

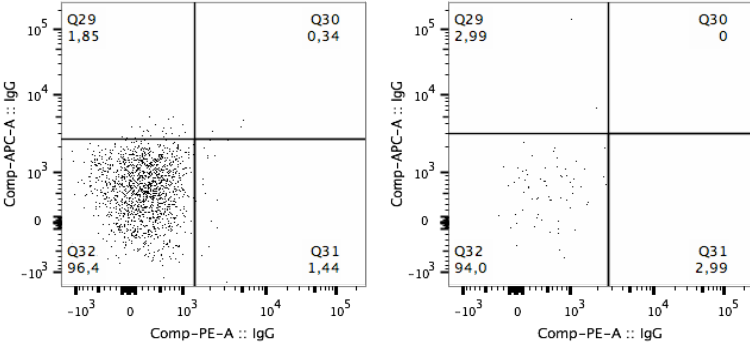

CD3+CD161-IFN $\gamma$ + / IL-17+

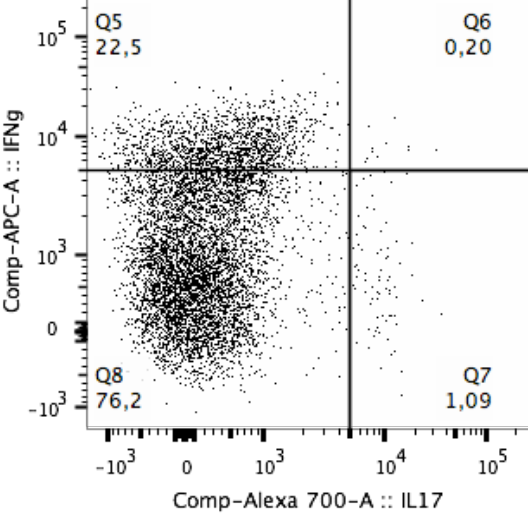

CD3+CD161+IFN $\gamma$ + / IL-17+

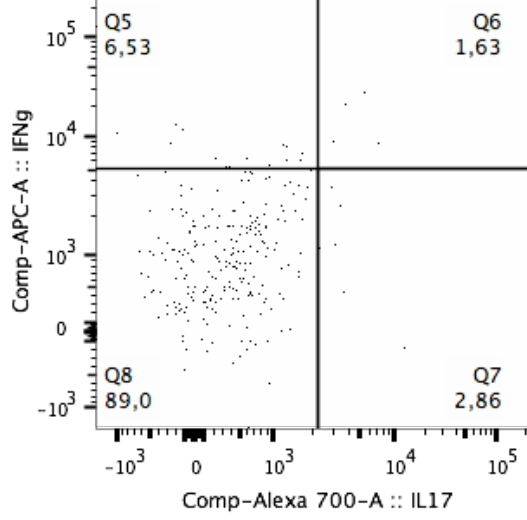

Isotype controls

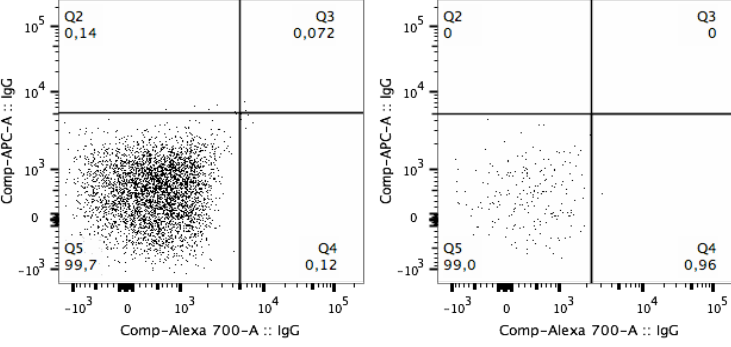

Sample ID: LTCH06

CD3+CD161-IFN $\gamma$ +/IL4

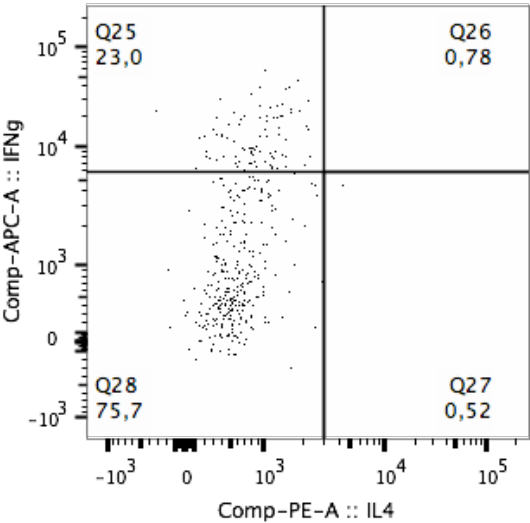

CD3+CD161+IFN $\gamma$ +/IL4

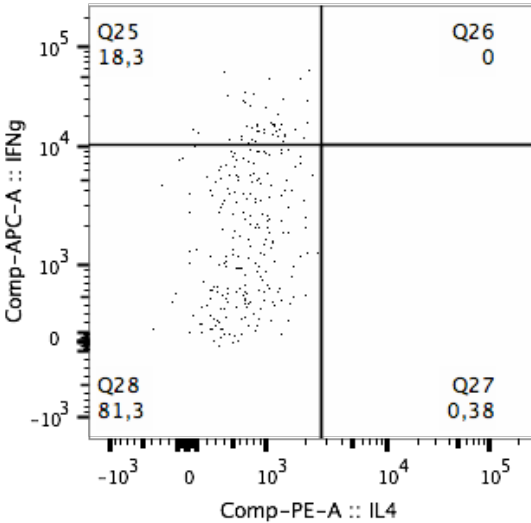

Isotype controls

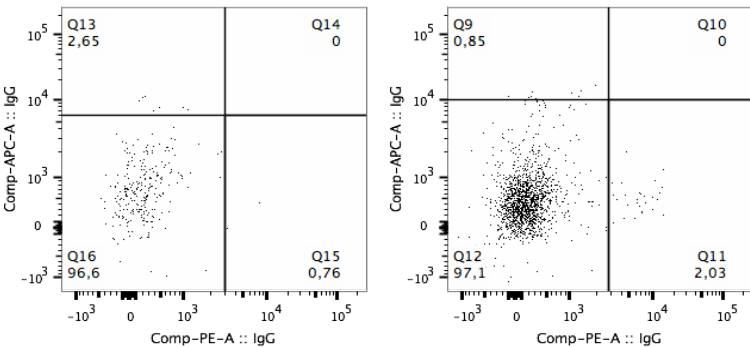

Sample ID: PTCH06

CD3+CD161-IFN $\gamma$ + / TNF $\alpha$ +

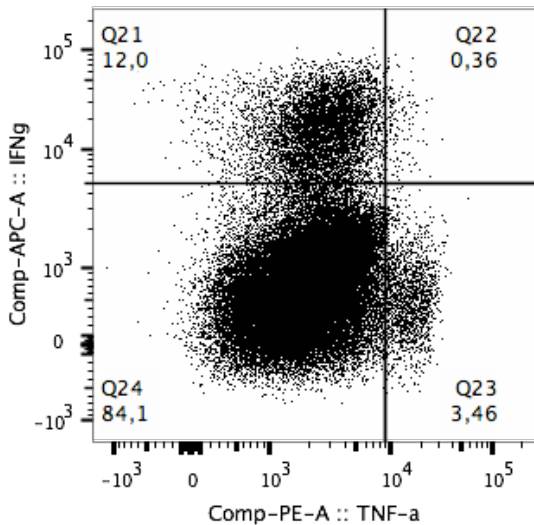

CD3+CD161+IFN $\gamma$ + / TNF $\alpha$ +

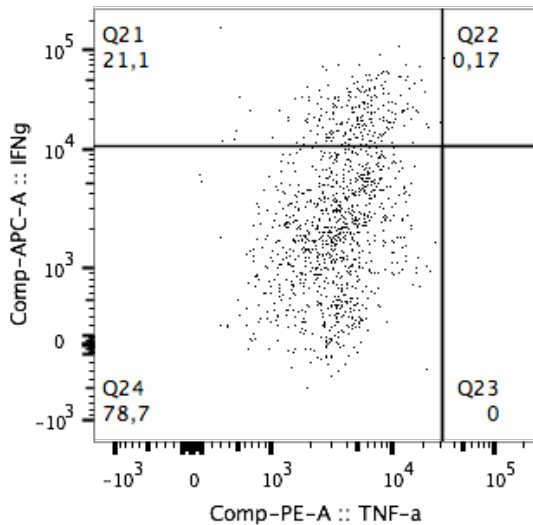

Isotype controls

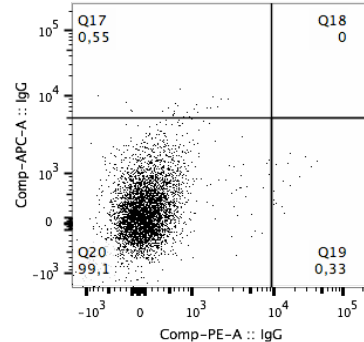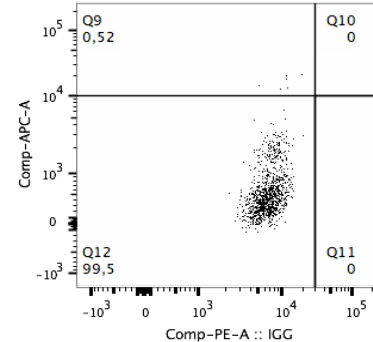

CD3+CD161-IFN $\gamma$ + / IL-17+

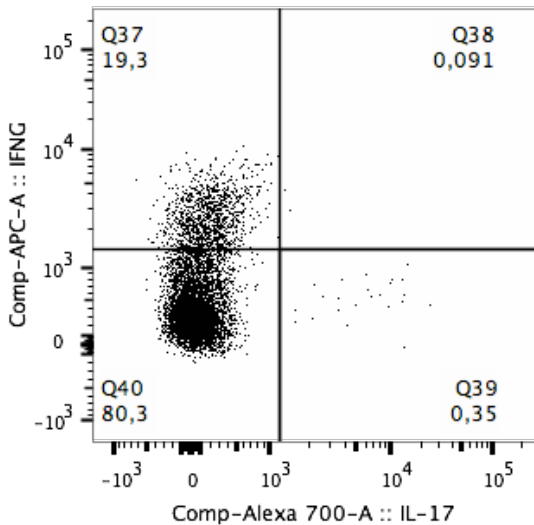

CD3+CD161+IFN $\gamma$ + / IL-17+

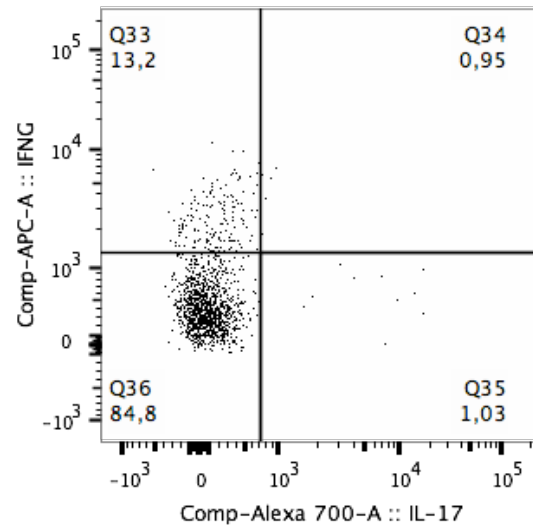

Isotype controls

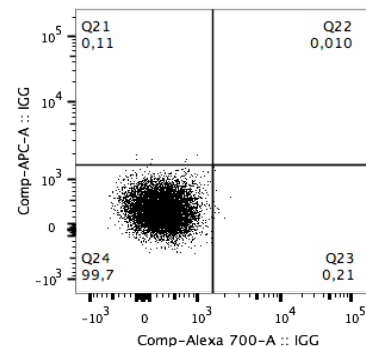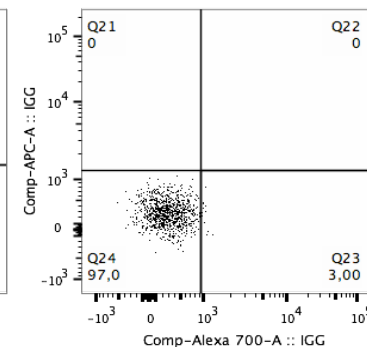

Sample ID: PTCH06

CD3+CD161-IFN $\gamma$ +/IL4

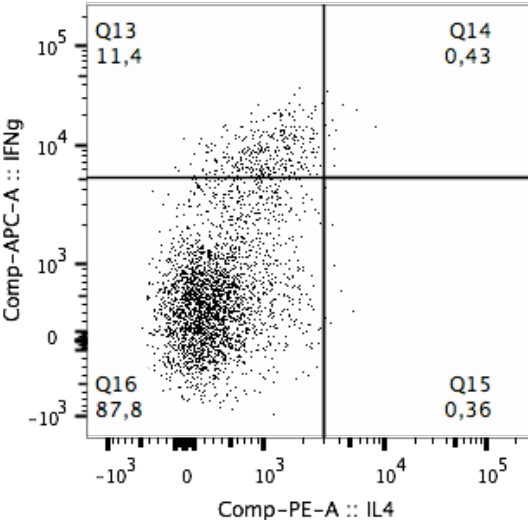

CD3+CD161+IFN $\gamma$ +/IL4

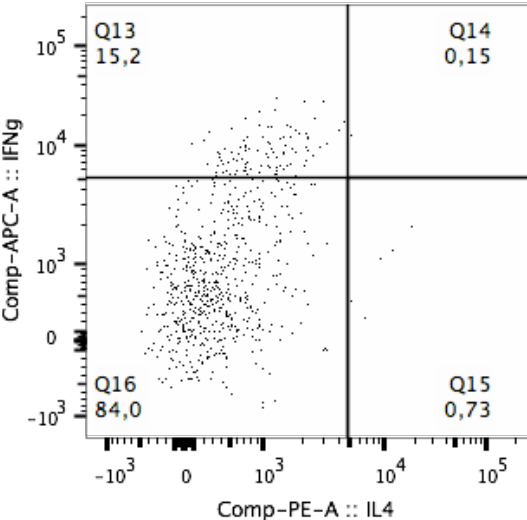

Isotype controls

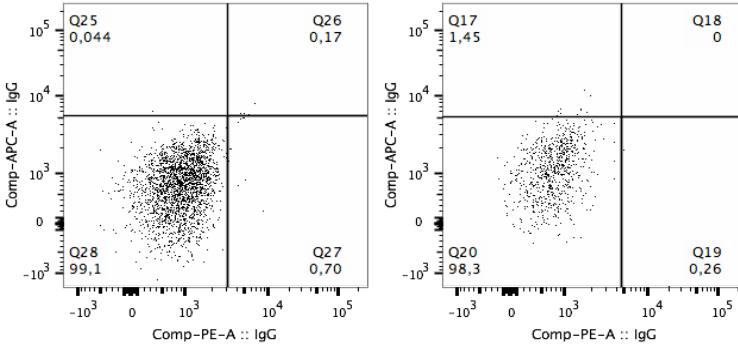

Sample ID: LTCH07

CD3+CD161-IFN $\gamma$ + / TNF $\alpha$ +

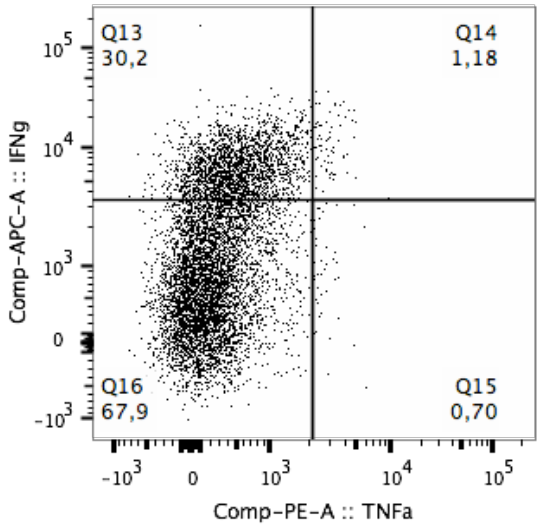

CD3+CD161+IFN $\gamma$ + / TNF $\alpha$ +

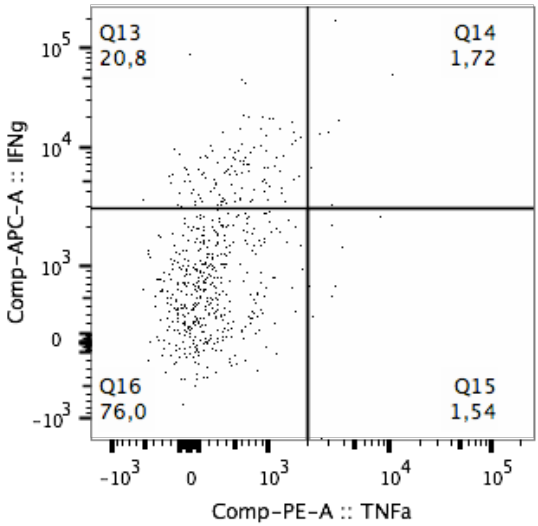

Isotype controls

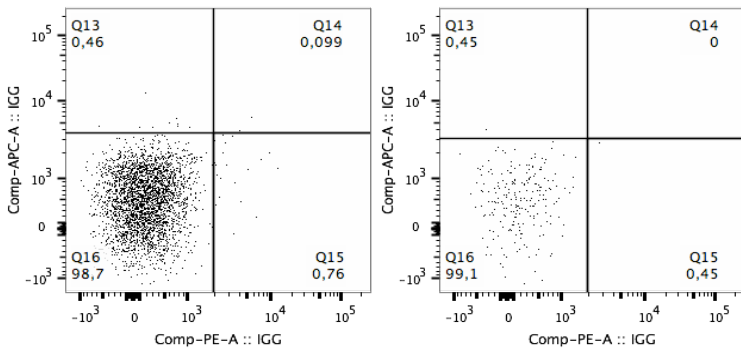

CD3+CD161-IFN $\gamma$ + / IL-17+

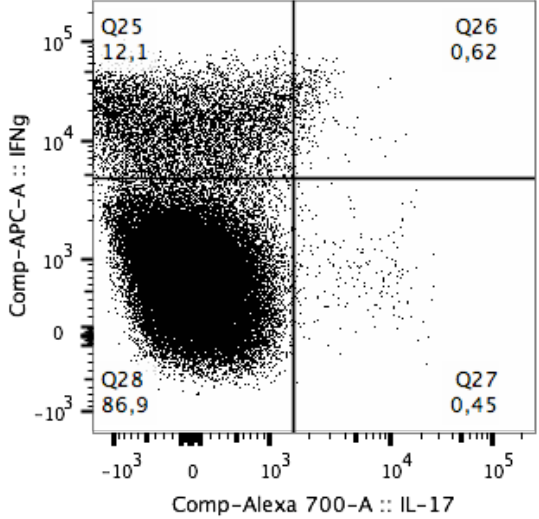

CD3+CD161+IFN $\gamma$ + / IL-17+

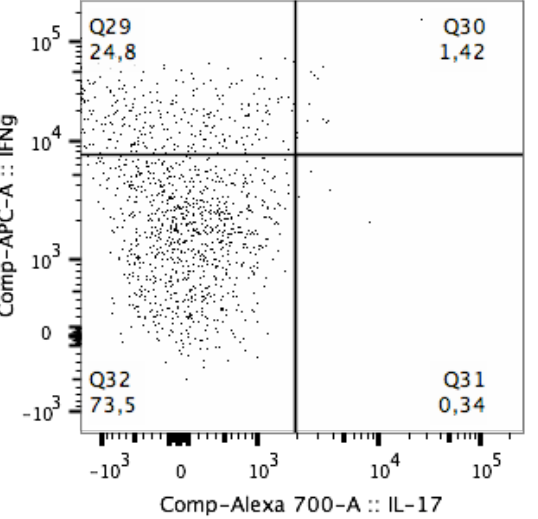

Isotype controls

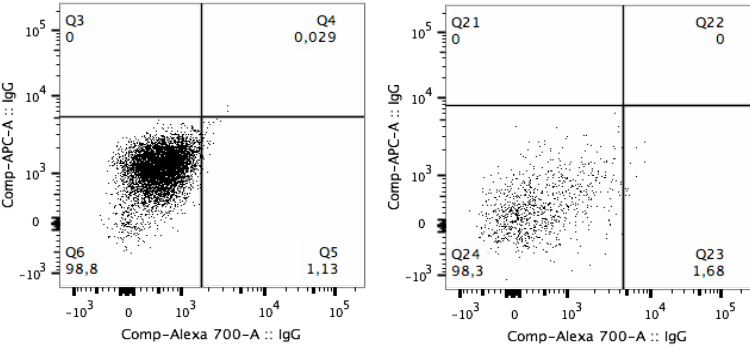



Sample ID: LTCH07

CD3+CD161-IFN $\gamma$ +/IL4

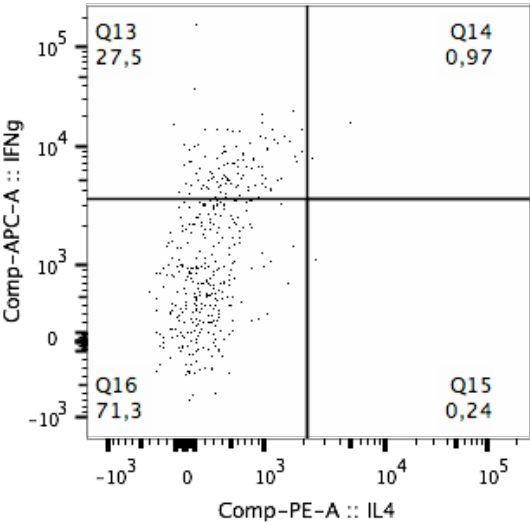

CD3+CD161+IFN $\gamma$ +/IL4

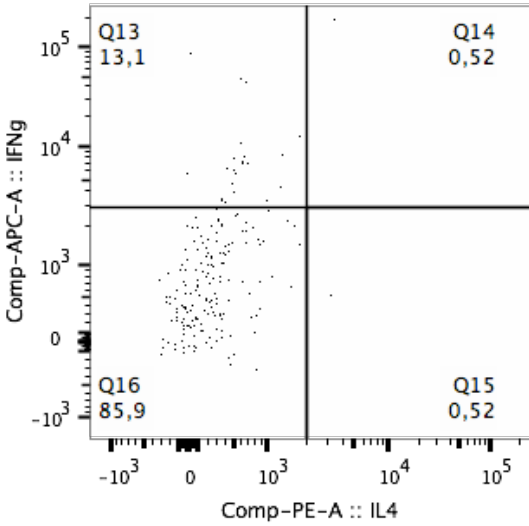

Isotype controls

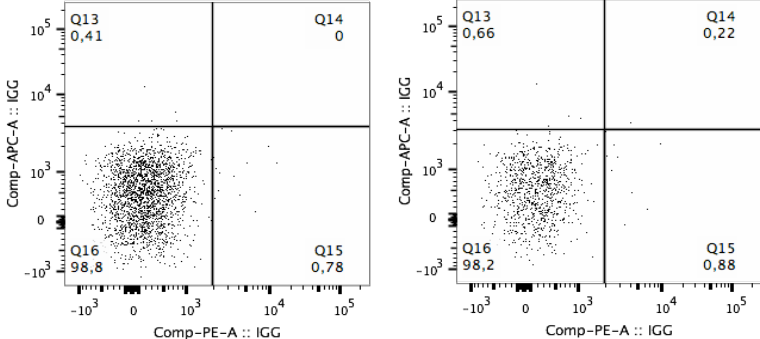

Sample ID: PTCH07

CD3+CD161-IFN $\gamma$ + / TNF $\alpha$ +

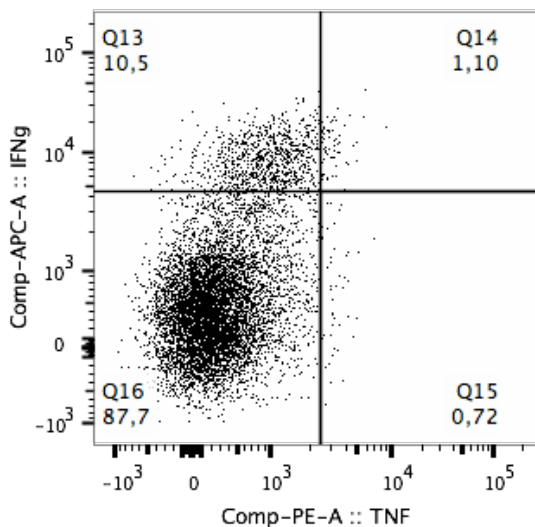

CD3+CD161+IFN $\gamma$ + / TNF $\alpha$ +

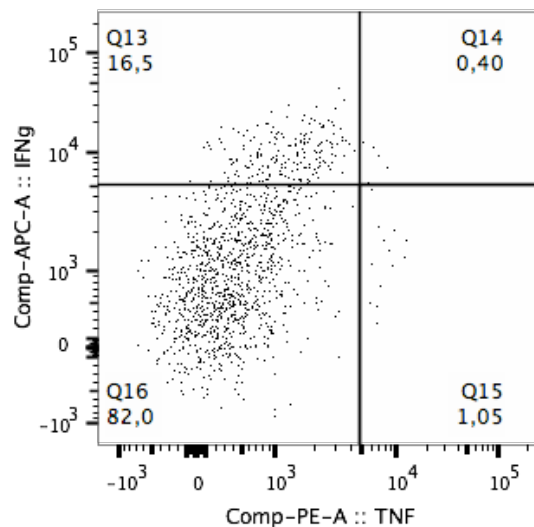

Isotype controls

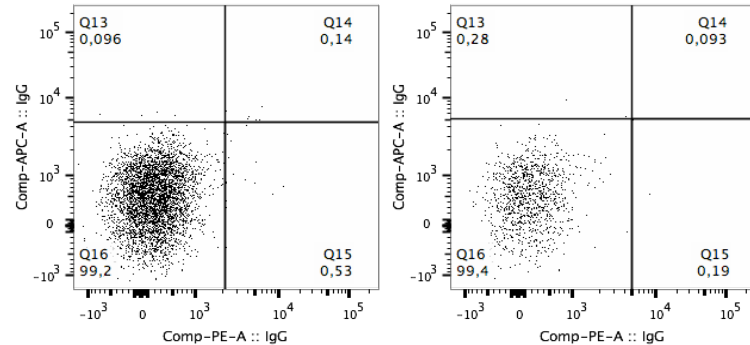

CD3+CD161-IFN $\gamma$ + / IL-17+

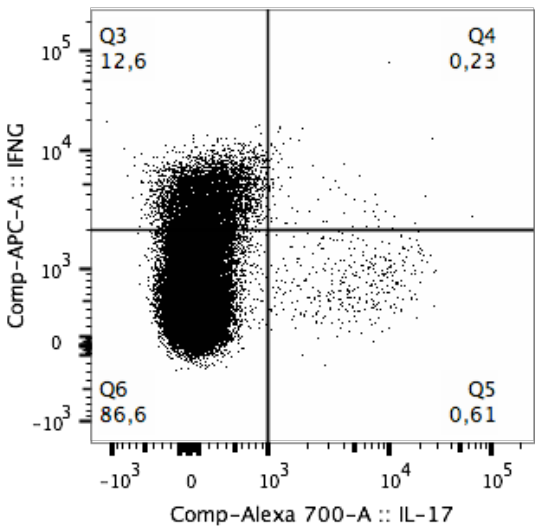

CD3+CD161+IFN $\gamma$ + / IL-17+

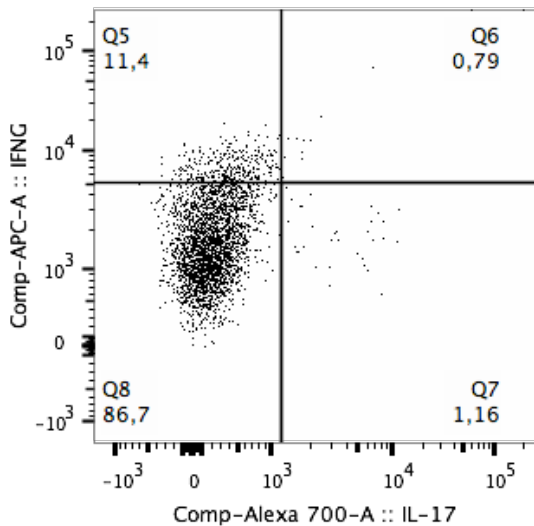

Isotype controls

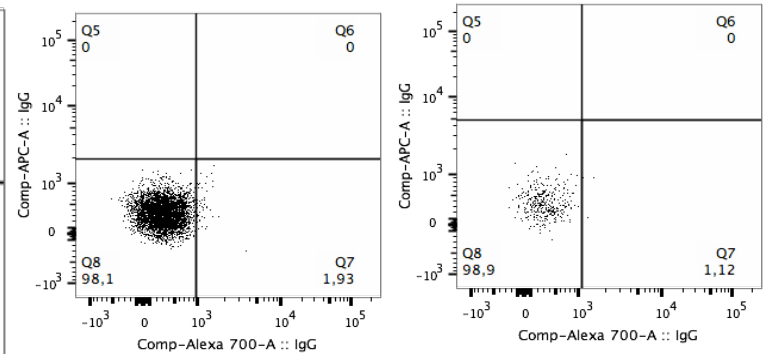

Sample ID: PTCH07

CD3+CD161-IFN $\gamma$ +/IL4

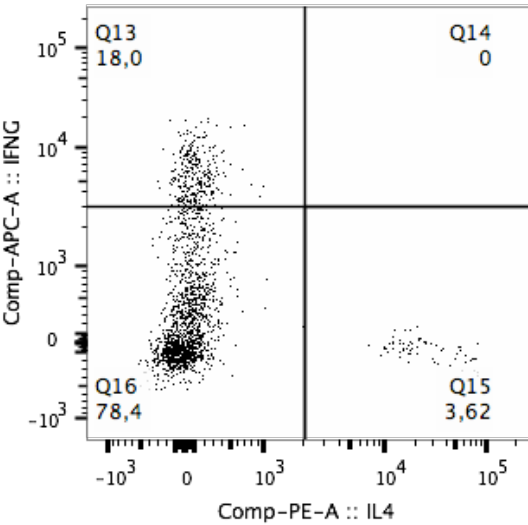

CD3+CD161+IFN $\gamma$ +/IL4

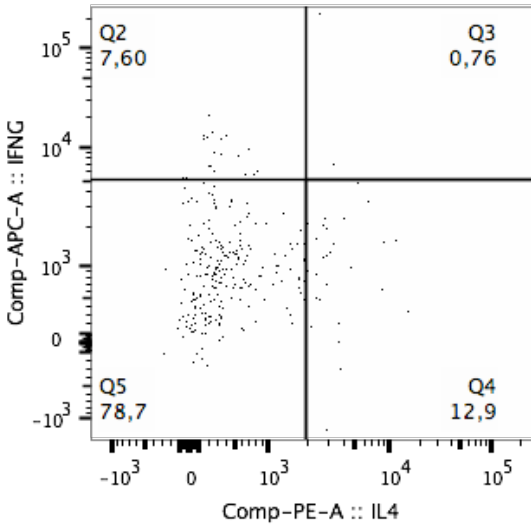

Isotype controls

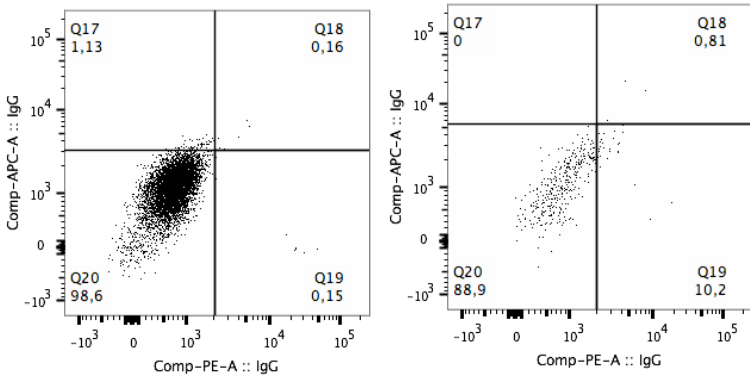

Sample ID: LTCH08

CD3+CD161-IFN $\gamma$ + / TNF $\alpha$ +

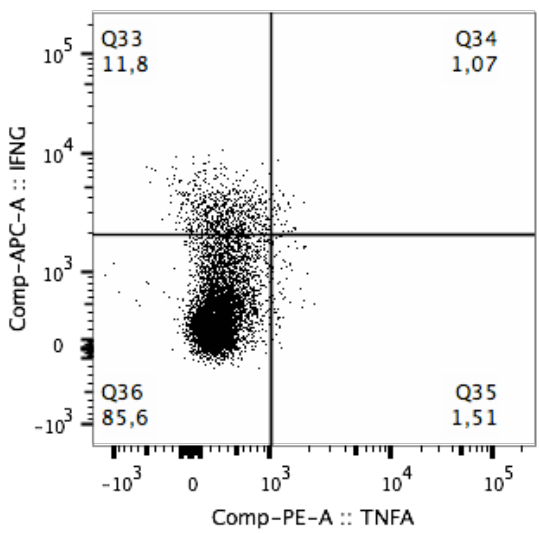

CD3+CD161+IFN $\gamma$ + / TNF $\alpha$ +

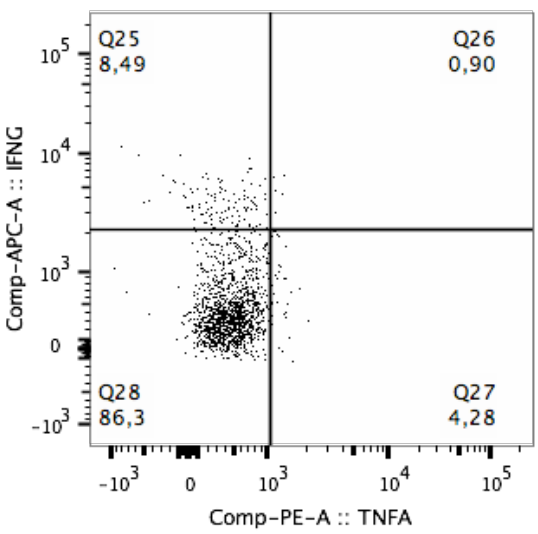

Isotype controls

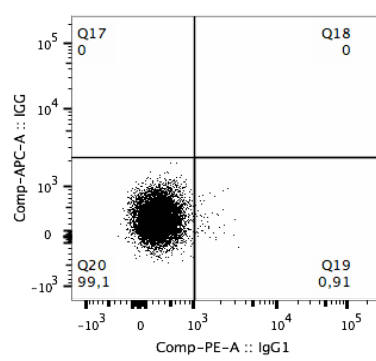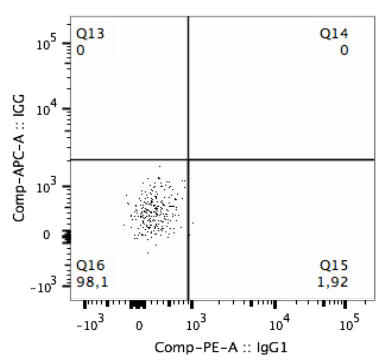

CD3+CD161-IFN $\gamma$ + / IL-17+

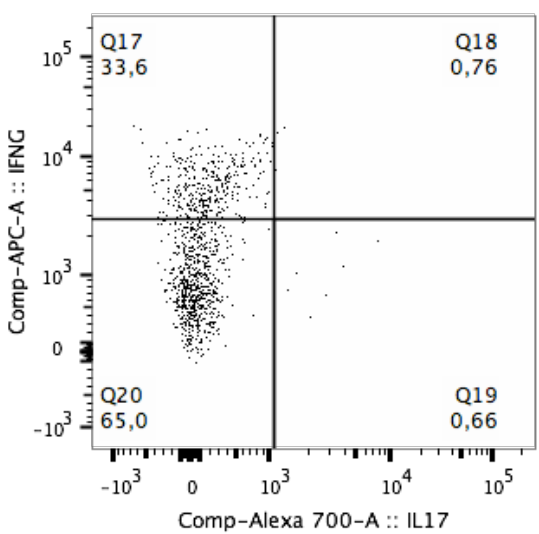

CD3+CD161+IFN $\gamma$ + / IL-17+

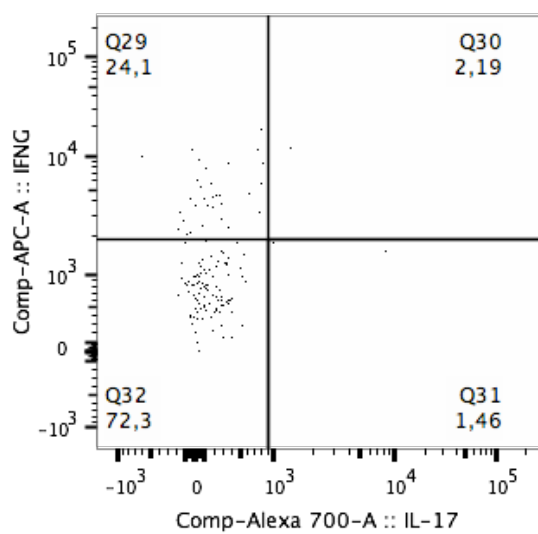

Isotype controls

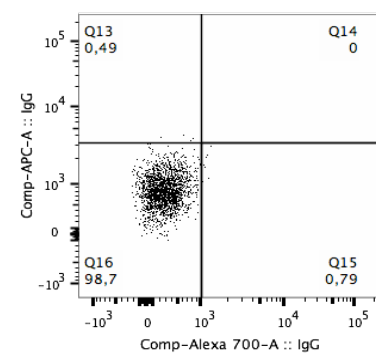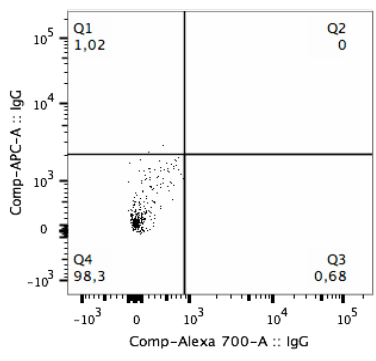

Sample ID: LTCH08

CD3+CD161-IFN $\gamma$ +/IL4

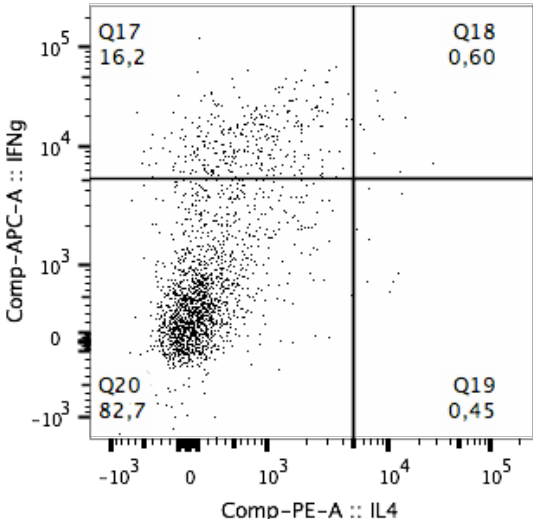

CD3+CD161+IFN $\gamma$ +/IL4

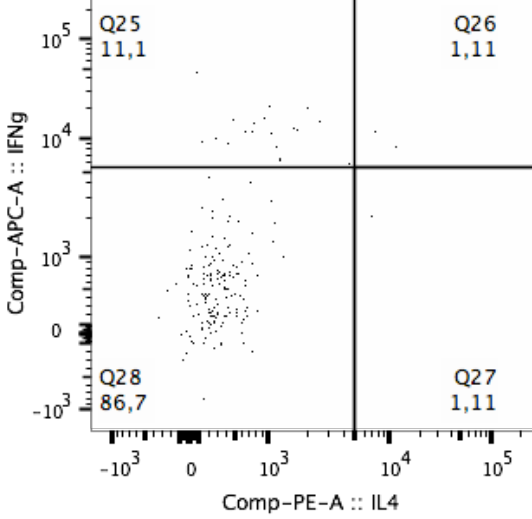

Isotype controls

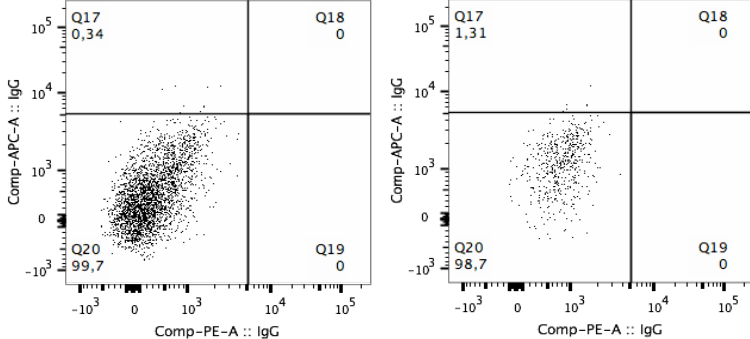

Sample ID: PTCH08

CD3+CD161-IFN $\gamma$ + / TNF $\alpha$ +

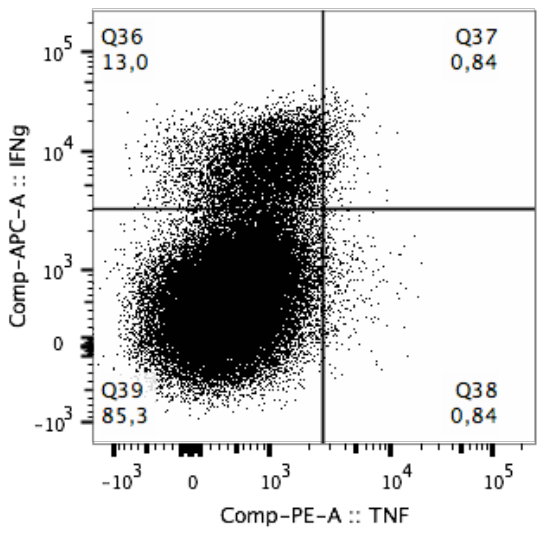

CD3+CD161+IFN $\gamma$ + / TNF $\alpha$ +

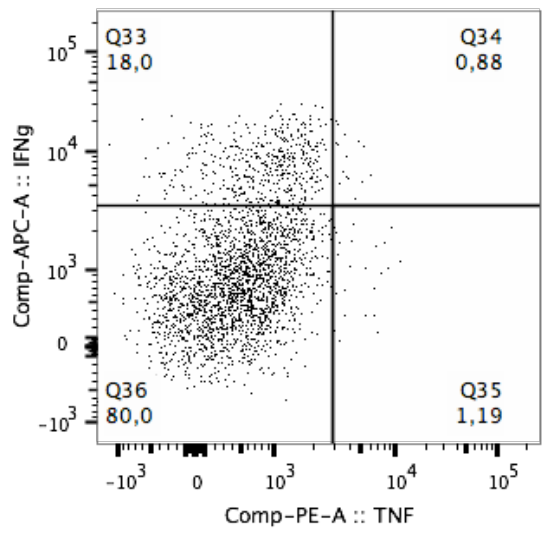

Isotype controls

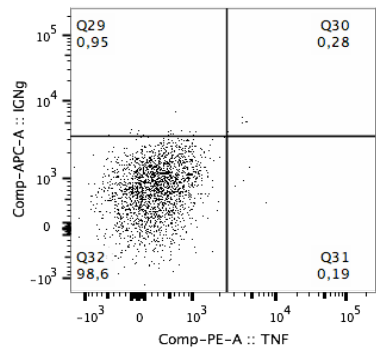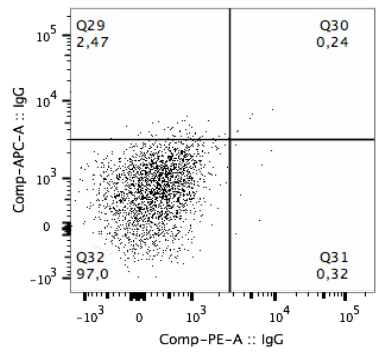

CD3+CD161-IFN $\gamma$ + / IL-17+

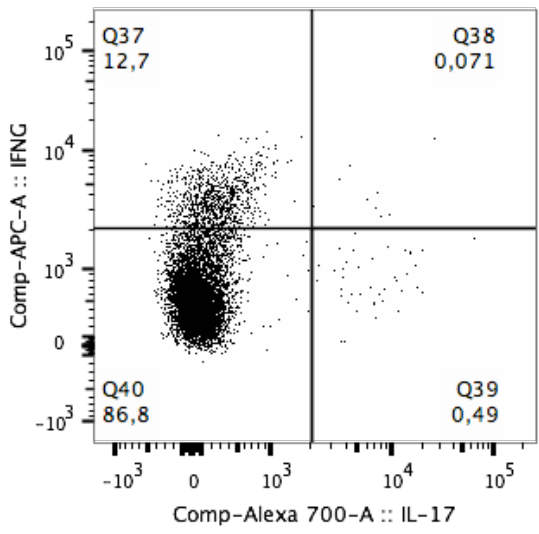

CD3+CD161+IFN $\gamma$ + / IL-17+

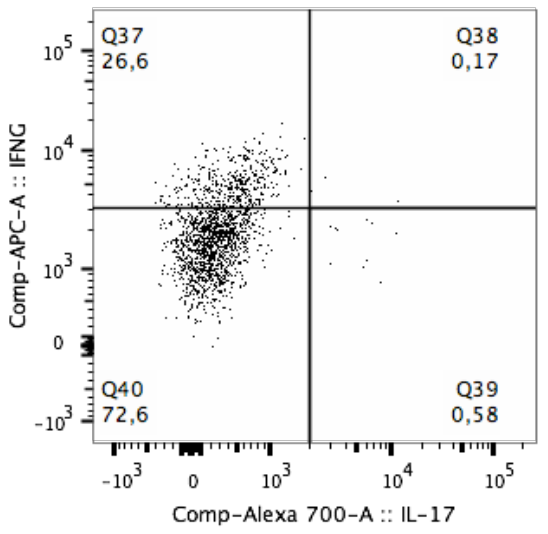

Isotype controls

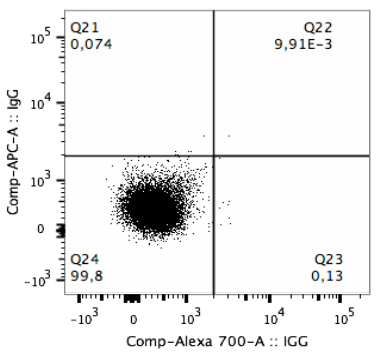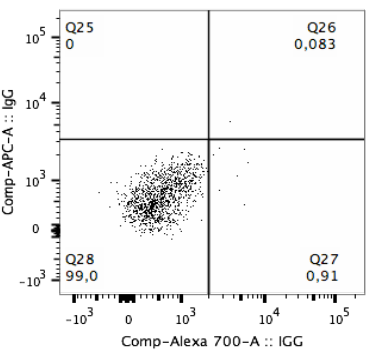

Sample ID: PTCH08

CD3+CD161-IFN $\gamma$ +/IL4

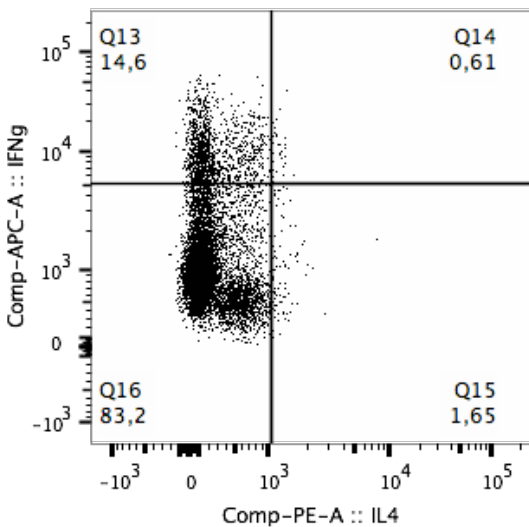

CD3+CD161+IFN $\gamma$ +/IL4

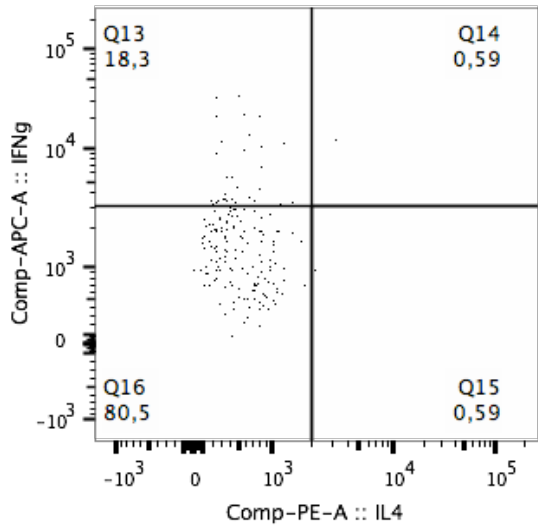

Isotype controls

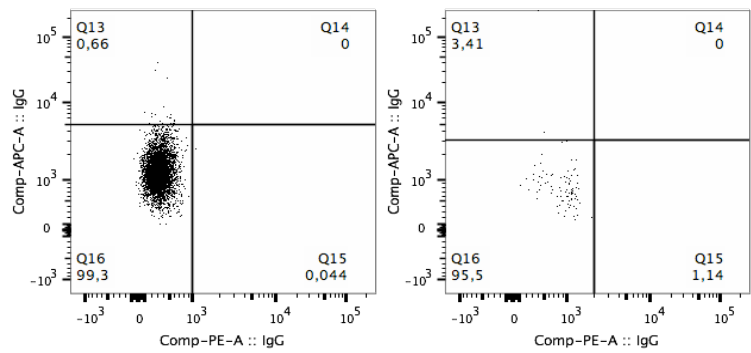

Sample ID: LTCH09

CD3+CD161-IFN $\gamma$ + / TNF $\alpha$ +

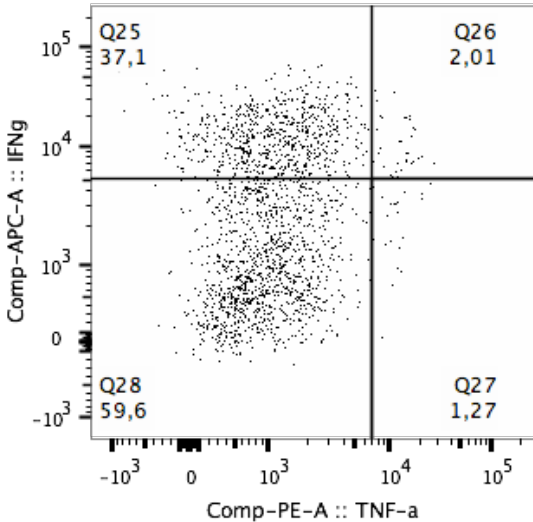

CD3+CD161+IFN $\gamma$ + / TNF $\alpha$ +

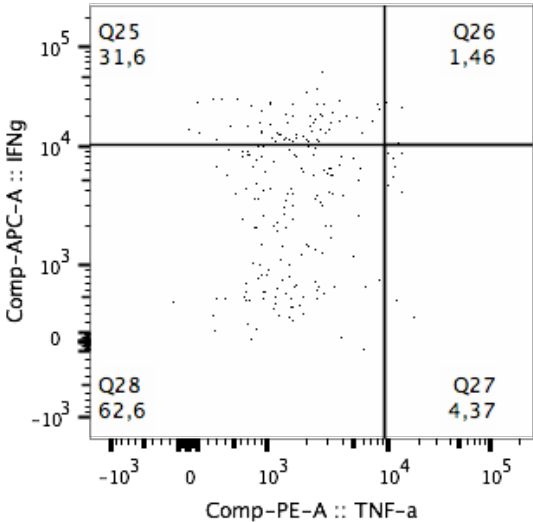

Isotype controls

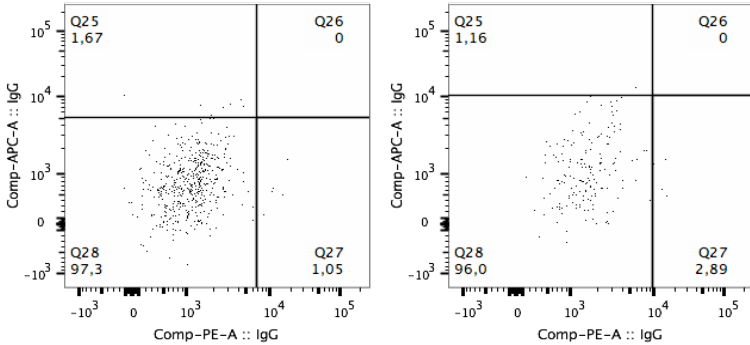

CD3+CD161-IFN $\gamma$ + / IL-17+

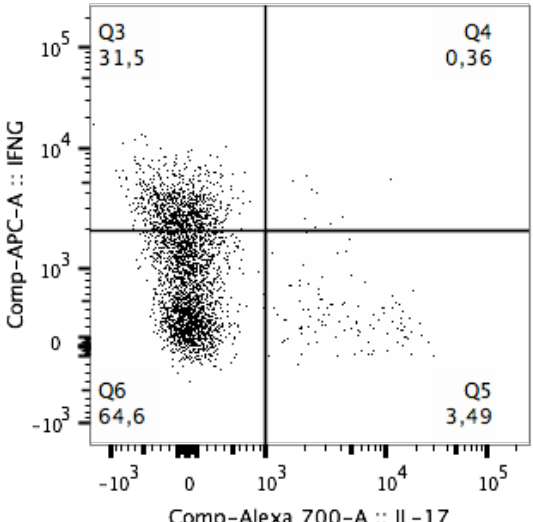

CD3+CD161+IFN $\gamma$ + / IL-17+

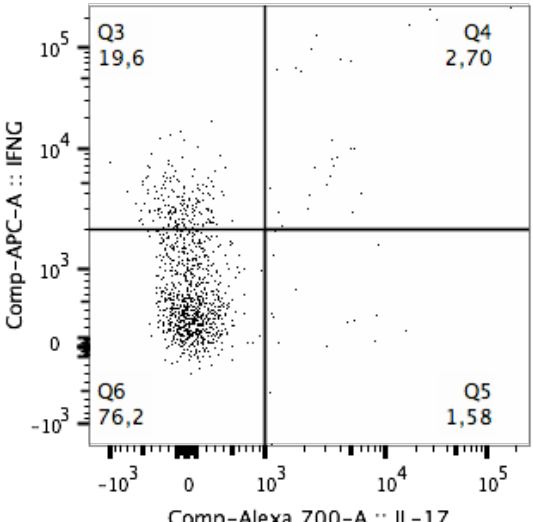

Isotype controls

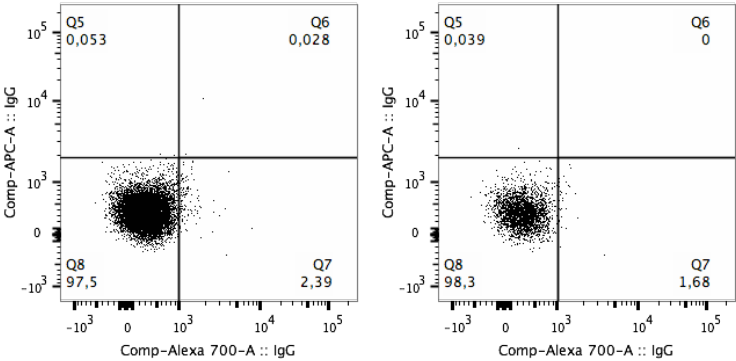



Sample ID: LTCH09

### CD3+CD161-IFN $\gamma$ +/IL4

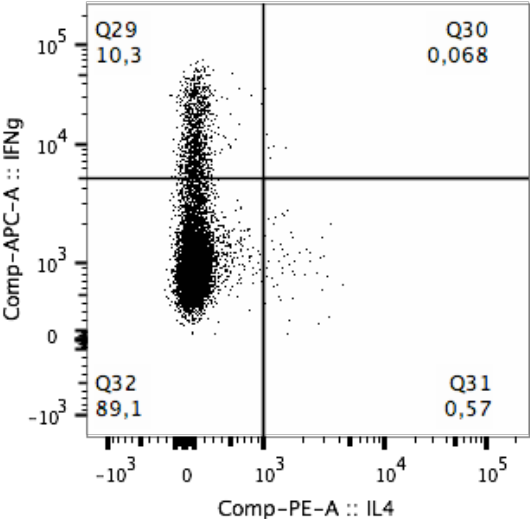

### CD3+CD161+IFN $\gamma$ +/IL4

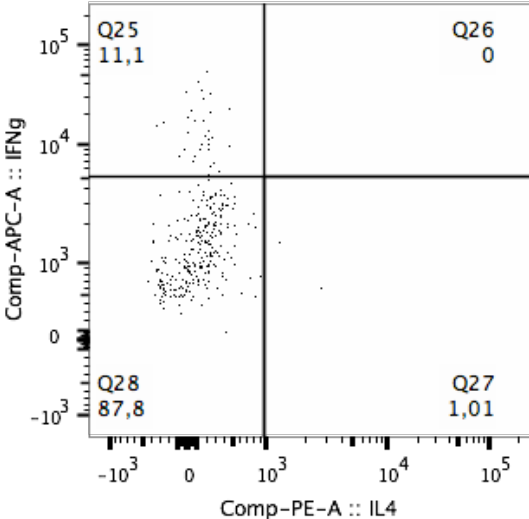

### Isotype controls

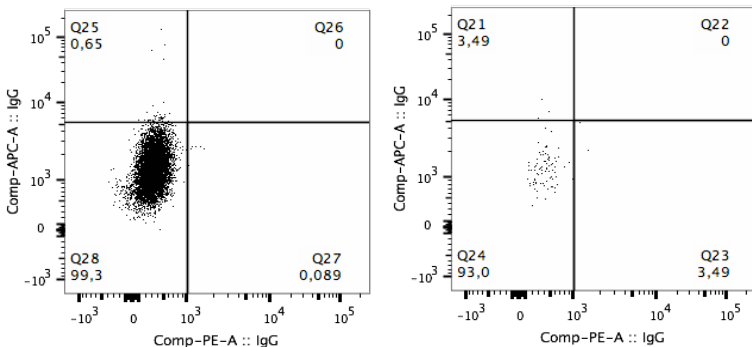

Sample ID: PTCH09

CD3+CD161-IFN $\gamma$ + / TNF $\alpha$ +

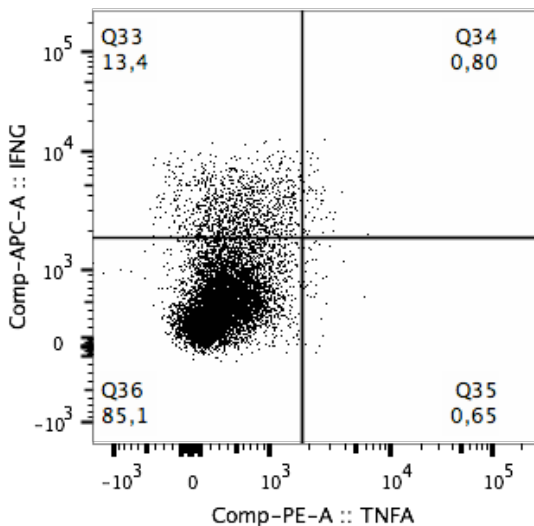

CD3+CD161+IFN $\gamma$ + / TNF $\alpha$ +

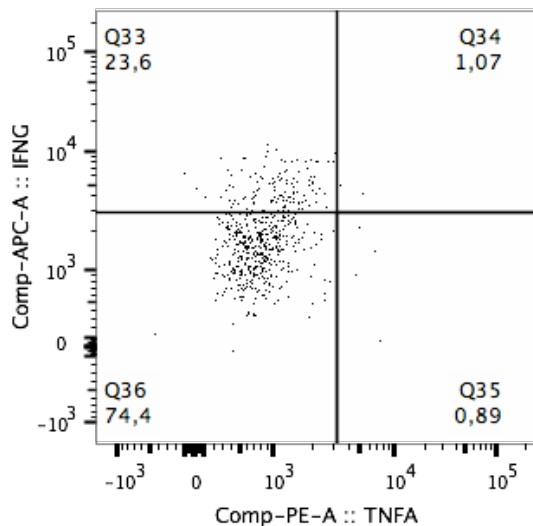

Isotype controls

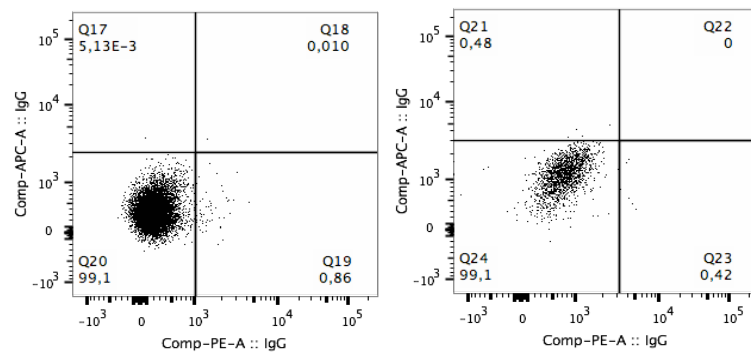

CD3+CD161-IFN $\gamma$ + / IL-17+

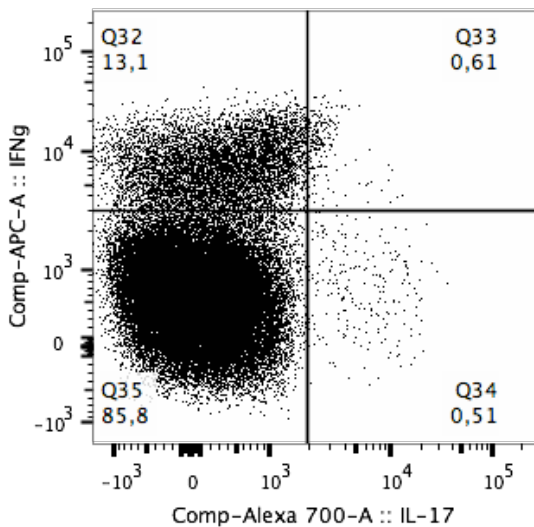

CD3+CD161+IFN $\gamma$ + / IL-17+

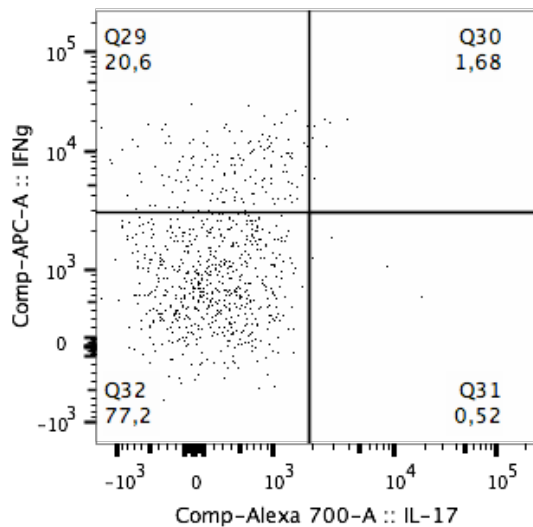

Isotype controls

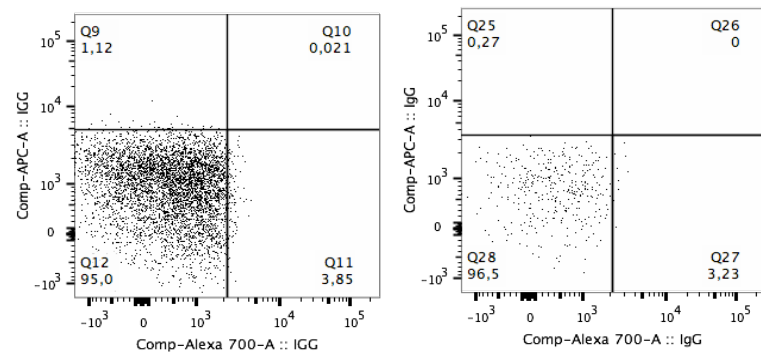

Sample ID: PTCH09

CD3+CD161-IFN $\gamma$ +/IL4

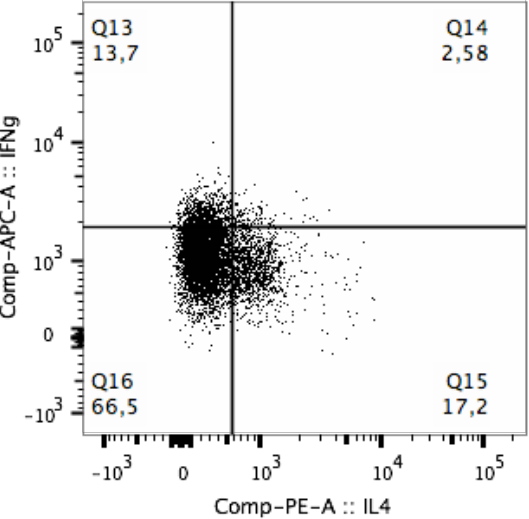

CD3+CD161+IFN $\gamma$ +/IL4

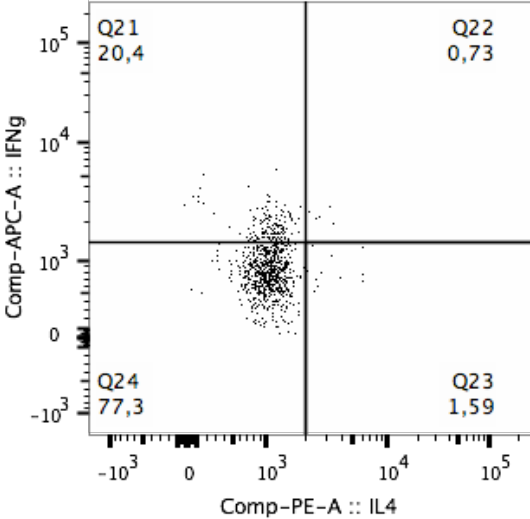

Isotype controls

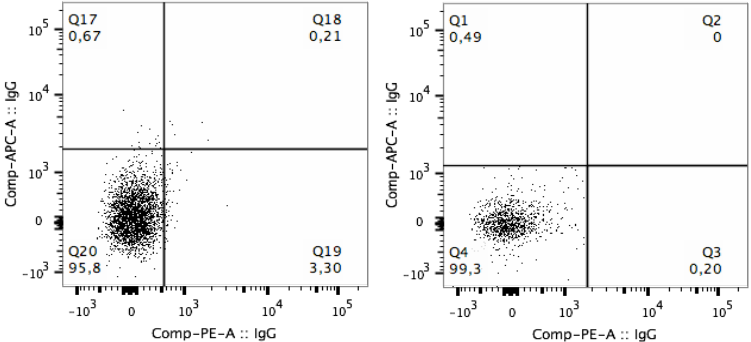

Supplement: pone.0123591.s003.pdf [file pone.0123591.s003.pdf]
